# Supplementary material
Source: publisher figshare collection journal article supplement (https://acs.figshare.com/ndownloader/files/8404067)
Supplement: Supplementary file 1 [file 8404067]

# Supporting Information

## Antimicrobial Spirotetronate Metabolites from Marine-derived

### *Micromonospora harpali* SCSIO GJ089

**Chun Gui,<sup>†,‡</sup> Shanwen Zhang,<sup>†,‡</sup> Xiangcheng Zhu,<sup>§</sup> Wenjuan Ding,<sup>†,‡</sup> Hongbo Huang,<sup>†</sup>  
Yu-Cheng Gu,<sup>⊥</sup> Yanwen Duan,<sup>§</sup> and Jianhua Ju<sup>†,‡,\*</sup>**

<sup>†</sup> CAS Key Laboratory of Tropical Marine Bio-resources and Ecology, Guangdong Key Laboratory of Marine Materia Medica, RNAM Center for Marine Microbiology, South China Sea Institute of Oceanology, Chinese Academy of Sciences, 164 West Xingang Road, Guangzhou 510301, China

<sup>‡</sup> University of Chinese Academy of Sciences, 19 Yuquan Road, Beijing 110039, China

<sup>§</sup> Xiangya International Academy of Translational Medicine, Central South University, National Engineering Research Center of Combinatorial Biosynthesis for Drug Discovery, 172 Tongzipo Road, Changsha 410013, China

<sup>⊥</sup> Syngenta Jealott's Hill International Research Centre, Bracknell, Berkshire RG42 6EY, UK

\*To whom correspondence should be addressed. Tel./Fax: +86-20-89023028; E-mail:

jju@scsio.ac.cn

## Table of Contents

|                                                                                                                                                                        | <b>Page</b> |
|------------------------------------------------------------------------------------------------------------------------------------------------------------------------|-------------|
| <b>Table S1.</b> $^1\text{H}$ (500 MHz) and $^{13}\text{C}$ (125 MHz) NMR data for compounds <b>3</b> , <b>6</b> and <b>10</b> .                                       | S3          |
| <b>Figure S1.</b> COSY (bold) and selected HMBC (arrow) correlations microsporinates B, E-F, and tetrocarcin P ( <b>4</b> , <b>7–8</b> , and <b>9</b> , respectively). | S5          |
| <b>Figure S2.</b> $^1\text{H}$ NMR (500 MHz) spectrum of compound <b>1</b> in $\text{CDCl}_3$ .                                                                        | S6          |
| <b>Figure S3.</b> $^{13}\text{C}$ NMR (125 MHz) spectrum of compound <b>1</b> in $\text{CDCl}_3$ .                                                                     | S7          |
| <b>Figure S4.</b> $^{13}\text{C}$ DEPT spectrum of compound <b>1</b> in $\text{CDCl}_3$ .                                                                              | S8          |
| <b>Figure S5.</b> $^1\text{H}$ - $^1\text{H}$ COSY spectrum of compound <b>1</b> in $\text{CDCl}_3$ .                                                                  | S9          |
| <b>Figure S6.</b> HSQC spectrum of compound <b>1</b> in $\text{CDCl}_3$ .                                                                                              | S10         |
| <b>Figure S7.</b> HMBC spectrum of compound <b>1</b> in $\text{CDCl}_3$ .                                                                                              | S11         |
| <b>Figure S8.</b> NOESY spectrum of compound <b>1</b> in $\text{CDCl}_3$ .                                                                                             | S12         |
| <b>Figure S9.</b> $^1\text{H}$ NMR (500 MHz) spectrum of compound <b>2</b> in $\text{CDCl}_3/\text{CD}_3\text{OD}$ .                                                   | S13         |
| <b>Figure S10.</b> $^{13}\text{C}$ NMR (125 MHz) spectrum of compound <b>2</b> in $\text{CDCl}_3/\text{CD}_3\text{OD}$ .                                               | S14         |
| <b>Figure S11.</b> $^{13}\text{C}$ DEPT spectrum of compound <b>2</b> in $\text{CDCl}_3/\text{CD}_3\text{OD}$ .                                                        | S15         |
| <b>Figure S12.</b> $^1\text{H}$ - $^1\text{H}$ COSY spectrum of compound <b>2</b> in $\text{CDCl}_3/\text{CD}_3\text{OD}$ .                                            | S16         |
| <b>Figure S13.</b> HSQC spectrum of compound <b>2</b> in $\text{CDCl}_3/\text{CD}_3\text{OD}$ .                                                                        | S17         |
| <b>Figure S14.</b> HMBC spectrum of compound <b>2</b> in $\text{CDCl}_3/\text{CD}_3\text{OD}$ .                                                                        | S18         |
| <b>Figure S15.</b> NOESY spectrum of compound <b>2</b> in $\text{CDCl}_3/\text{CD}_3\text{OD}$ .                                                                       | S19         |
| <b>Figure S16.</b> $^1\text{H}$ NMR (500 MHz) spectrum of compound <b>3</b> in $\text{CDCl}_3$ .                                                                       | S20         |
| <b>Figure S17.</b> $^{13}\text{C}$ NMR (125 MHz) spectrum of compound <b>3</b> in $\text{CDCl}_3$ .                                                                    | S21         |
| <b>Figure S18.</b> $^{13}\text{C}$ DEPT spectrum of compound <b>3</b> in $\text{CDCl}_3$ .                                                                             | S22         |
| <b>Figure S19.</b> $^1\text{H}$ - $^1\text{H}$ COSY spectrum of compound <b>3</b> in $\text{CDCl}_3$ .                                                                 | S23         |
| <b>Figure S20.</b> HSQC spectrum of compound <b>3</b> in $\text{CDCl}_3$ .                                                                                             | S24         |
| <b>Figure S21.</b> HMBC spectrum of compound <b>3</b> in $\text{CDCl}_3$ .                                                                                             | S25         |
| <b>Figure S22.</b> NOESY spectrum of compound <b>3</b> in $\text{CDCl}_3$ .                                                                                            | S26         |
| <b>Figure S23.</b> $^1\text{H}$ NMR (500 MHz) spectrum of compound <b>4</b> in $\text{CDCl}_3$ .                                                                       | S27         |
| <b>Figure S24.</b> $^{13}\text{C}$ NMR (125 MHz) spectrum of compound <b>4</b> in $\text{CDCl}_3$ .                                                                    | S28         |
| <b>Figure S25.</b> $^{13}\text{C}$ DEPT spectrum of compound <b>4</b> in $\text{CDCl}_3$ .                                                                             | S29         |
| <b>Figure S26.</b> $^1\text{H}$ - $^1\text{H}$ COSY spectrum of compound <b>4</b> in $\text{CDCl}_3$ .                                                                 | S30         |
| <b>Figure S27.</b> HSQC spectrum of compound <b>4</b> in $\text{CDCl}_3$ .                                                                                             | S31         |
| <b>Figure S28.</b> HMBC spectrum of compound <b>4</b> in $\text{CDCl}_3$ .                                                                                             | S32         |
| <b>Figure S29.</b> NOESY spectrum of compound <b>4</b> in $\text{CDCl}_3$ .                                                                                            | S33         |
| <b>Figure S30.</b> $^1\text{H}$ NMR (500 MHz) spectrum of compound <b>5</b> in $\text{CDCl}_3$ .                                                                       | S34         |
| <b>Figure S31.</b> $^{13}\text{C}$ NMR (125 MHz) spectrum of compound <b>5</b> in $\text{CDCl}_3$ .                                                                    | S35         |
| <b>Figure S32.</b> $^{13}\text{C}$ DEPT spectrum of compound <b>5</b> in $\text{CDCl}_3$ .                                                                             | S36         |
| <b>Figure S33.</b> $^1\text{H}$ - $^1\text{H}$ COSY spectrum of compound <b>5</b> in $\text{CDCl}_3$ .                                                                 | S37         |
| <b>Figure S34.</b> HSQC spectrum of compound <b>5</b> in $\text{CDCl}_3$ .                                                                                             | S38         |
| <b>Figure S35.</b> HMBC spectrum of compound <b>5</b> in $\text{CDCl}_3$ .                                                                                             | S39         |
| <b>Figure S36.</b> NOESY spectrum of compound <b>5</b> in $\text{CDCl}_3$ .                                                                                            | S40         |
| <b>Figure S37.</b> $^1\text{H}$ NMR (500 MHz) spectrum of compound <b>6</b> in $\text{CD}_3\text{OD}$ .                                                                | S41         |
| <b>Figure S38.</b> $^{13}\text{C}$ NMR (125 MHz) spectrum of compound <b>6</b> in $\text{CD}_3\text{OD}$ .                                                             | S42         |
| <b>Figure S39.</b> $^{13}\text{C}$ DEPT spectrum of compound <b>6</b> in $\text{CD}_3\text{OD}$ .                                                                      | S43         |
| <b>Figure S40.</b> $^1\text{H}$ - $^1\text{H}$ COSY spectrum of compound <b>6</b> in $\text{CD}_3\text{OD}$ .                                                          | S44         |

|                    |                                                                                          |     |
|--------------------|------------------------------------------------------------------------------------------|-----|
| <b>Figure S41.</b> | HSQC spectrum of compound <b>6</b> in CD <sub>3</sub> OD.                                | S45 |
| <b>Figure S42.</b> | HMBC spectrum of compound <b>6</b> in CD <sub>3</sub> OD.                                | S46 |
| <b>Figure S43.</b> | <sup>1</sup> H NMR (700 MHz) spectrum of compound <b>7</b> in CD <sub>3</sub> OD.        | S47 |
| <b>Figure S44.</b> | <sup>13</sup> C NMR (176 MHz) spectrum of compound <b>7</b> in CD <sub>3</sub> OD.       | S48 |
| <b>Figure S45.</b> | <sup>13</sup> C DEPT spectrum of compound <b>7</b> in CD <sub>3</sub> OD.                | S49 |
| <b>Figure S46.</b> | <sup>1</sup> H- <sup>1</sup> H COSY spectrum of compound <b>7</b> in CD <sub>3</sub> OD. | S50 |
| <b>Figure S47.</b> | HSQC spectrum of compound <b>7</b> in CD <sub>3</sub> OD.                                | S51 |
| <b>Figure S48.</b> | HMBC spectrum of compound <b>7</b> in CD <sub>3</sub> OD.                                | S52 |
| <b>Figure S49.</b> | NOESY spectrum of compound <b>7</b> in CD <sub>3</sub> OD.                               | S53 |
| <b>Figure S50.</b> | <sup>1</sup> H NMR (700 MHz) spectrum of compound <b>8</b> in CD <sub>3</sub> OD.        | S54 |
| <b>Figure S51.</b> | <sup>13</sup> C NMR (176 MHz) spectrum of compound <b>8</b> in CD <sub>3</sub> OD.       | S55 |
| <b>Figure S52.</b> | <sup>13</sup> C DEPT spectrum of compound <b>8</b> in CD <sub>3</sub> OD.                | S56 |
| <b>Figure S53.</b> | <sup>1</sup> H- <sup>1</sup> H COSY spectrum of compound <b>8</b> in CD <sub>3</sub> OD. | S57 |
| <b>Figure S54.</b> | HSQC spectrum of compound <b>8</b> in CD <sub>3</sub> OD.                                | S58 |
| <b>Figure S55.</b> | HMBC spectrum of compound <b>8</b> in CD <sub>3</sub> OD.                                | S59 |
| <b>Figure S56.</b> | NOESY spectrum of compound <b>8</b> in CD <sub>3</sub> OD.                               | S60 |
| <b>Figure S57.</b> | <sup>1</sup> H NMR (700 MHz) spectrum of compound <b>9</b> in CD <sub>3</sub> OD.        | S61 |
| <b>Figure S58.</b> | <sup>13</sup> C NMR (176 MHz) spectrum of compound <b>9</b> in CD <sub>3</sub> OD.       | S62 |
| <b>Figure S59.</b> | <sup>13</sup> C DEPT spectrum of compound <b>9</b> in CD <sub>3</sub> OD.                | S63 |
| <b>Figure S60.</b> | <sup>1</sup> H- <sup>1</sup> H COSY spectrum of compound <b>9</b> in CD <sub>3</sub> OD. | S64 |
| <b>Figure S61.</b> | HSQC spectrum of compound <b>9</b> in CD <sub>3</sub> OD.                                | S65 |
| <b>Figure S62.</b> | HMBC spectrum of compound <b>9</b> in CD <sub>3</sub> OD.                                | S66 |
| <b>Figure S63.</b> | NOESY spectrum of compound <b>9</b> in CD <sub>3</sub> OD.                               | S67 |
| <b>Figure S64.</b> | The CD spectra of compounds <b>1-12</b> .                                                | S68 |

**Table S1.**  $^1\text{H}$  (500 MHz) and  $^{13}\text{C}$  (125 MHz) NMR data for compounds **3**, **6** and **10**.

| position    | <b>3<sup>a</sup></b>     |                                             | <b>6<sup>b</sup></b>     |                                             | <b>10<sup>a</sup></b> (tetrocarcin A) |                                             |
|-------------|--------------------------|---------------------------------------------|--------------------------|---------------------------------------------|---------------------------------------|---------------------------------------------|
|             | $\delta_{\text{C}}$ type | $\delta_{\text{H}}$ mult. ( <i>J</i> in Hz) | $\delta_{\text{C}}$ type | $\delta_{\text{H}}$ mult. ( <i>J</i> in Hz) | $\delta_{\text{C}}$ type              | $\delta_{\text{H}}$ mult. ( <i>J</i> in Hz) |
| 1           | 166.8, C                 |                                             | 177.2, C                 |                                             | 177.3, C                              |                                             |
| 2           | 100.9, C                 |                                             | 98.9, C                  |                                             | 98.8, C                               |                                             |
| 3           | 206.6, C                 |                                             | 199.5, C                 |                                             | 200.2, C                              |                                             |
| 4           | 51.3, C                  |                                             | 52.8, C                  |                                             | 52.8, C                               |                                             |
| 5           | 43.3, CH                 | 2.0, m                                      | 45.5, CH                 | 2.10, m                                     | 40.3, CH                              | 2.04, m                                     |
| 6           | 31.3, CH                 | 1.58, overlapped                            | 32.6, CH                 | 1.49, overlapped                            | 32.6, CH                              | 1.49, m                                     |
| 7 $\alpha$  | 41.7, CH <sub>2</sub>    | 1.52, overlapped                            | 43.3, CH <sub>2</sub>    | 1.49, overlapped                            | 43.2, CH <sub>2</sub>                 | 1.59, m                                     |
| 7 $\beta$   |                          | 1.56, overlapped                            |                          | 1.59, m                                     |                                       | 1.47, m                                     |
| 8           | 34.7, CH                 | 2.20, m                                     | 36.2, CH                 | 2.20, m                                     | 36.2, CH                              | 2.20, m                                     |
| 9           | 84.4, CH                 | 3.45, m                                     | 86.6, CH                 | 3.43, dd (10.1, 4.4)                        | 86.7, CH                              | 3.42, dd (10.9, 5.2)                        |
| 10          | 38.6, CH                 | 2.08, overlapped                            | 40.4, CH                 | 2.04, m                                     | 45.5, CH                              | 2.1, t (9.7)                                |
| 11          | 126.5, CH                | 5.75, d (10.5)                              | 127.0, CH                | 5.76, d (10.1)                              | 129.0, CH                             | 5.39,ddd (10.0, 5.1, 2.4)                   |
| 12          | 126.1, CH                | 5.41, ddd (9.8, 4.8, 2.1)                   | 128.9, CH                | 5.40, m                                     | 126.9, CH                             | 5.73, d (10.4)                              |
| 13          | 54.3, CH                 | 3.25, m                                     | 53.0, CH                 | 3.64, overlapped                            | 52.9, CH                              | 3.64, m                                     |
| 14          | 136.1, C                 |                                             | 138.4, C                 |                                             | 138.2, C                              |                                             |
| 15          | 123.1, CH                | 5.15, d (9.1)                               | 123.0, CH                | 5.21, d (5.3)                               | 123.2, CH                             | 5.23, m                                     |
| 16          | 30.8, CH <sub>2</sub>    | 2.22, m; 2.31, m                            | 32.1, CH <sub>2</sub>    | 2.23, m; 2.32, m                            | 32.2, CH <sub>2</sub>                 | 2.22, m; 2.29, m                            |
| 17          | 78.0, CH                 | 4.27, br s                                  | 80.0, CH                 | 4.27, br s                                  | 79.9, CH                              | 4.20, br s                                  |
| 18          | 141.3, C                 |                                             | 139.4, C                 |                                             | 139.2, C                              |                                             |
| 19          | 118.7, CH                | 5.21, d (10.0)                              | 122.3, CH                | 5.15, d (9.3)                               | 122.0, CH                             | 5.23, m                                     |
| 20          | 44.9, CH                 | 3.0, t (9.7)                                | 46.6, CH                 | 2.80, t (9.5)                               | 46.5, CH                              | 2.81, t (9.5)                               |
| 21          | 69.7, CH                 | 4.72, dm (8.7)                              | 72.2, CH                 | 4.38, d (9.3)                               | 71.4, CH                              | 4.58, dm (9.3)                              |
| 22          | 139.6, CH                | 6.35, s                                     | 140.8, CH                | 6.3, s                                      | 151.9, CH                             | 6.87, s                                     |
| 23          | 130.9, C                 |                                             | 134.3, C                 |                                             | 139.3, C                              |                                             |
| 24 $\alpha$ | 32.3, CH <sub>2</sub>    | 2.43, d (17.7)                              | 33.4, CH <sub>2</sub>    | 2.26, overlapped                            | 30.7, CH <sub>2</sub>                 | 2.24, d (18.5)                              |
| 24 $\beta$  |                          | 2.88, d (17.7)                              |                          | 2.87, d (18.0)                              |                                       | 2.75, dd (18.7, 2.6)                        |
| 25          | 84.5, C                  |                                             | 85.8, C                  |                                             | 85.4, C                               |                                             |
| 26          | 201.9, C                 |                                             | 200.5, C                 |                                             | 200.8, C                              |                                             |
| 27          | 15.6, CH <sub>3</sub>    | 1.63, s                                     | 15.5, CH <sub>3</sub>    | 1.49, s                                     | 15.6, CH <sub>3</sub>                 | 1.48, s                                     |
| 28          | 22.2, CH <sub>3</sub>    | 0.65, d (4.5)                               | 23.2, CH <sub>3</sub>    | 0.66, d (3.9)                               | 23.0, CH <sub>3</sub>                 | 0.64, d (5.9)                               |
| 29          | 14.1, CH <sub>3</sub>    | 1.08, d (7.0)                               | 14.7, CH <sub>3</sub>    | 1.11, d (8.4)                               | 14.7, CH <sub>3</sub>                 | 1.10, d (7.0)                               |
| 30          | 14.5, CH <sub>3</sub>    | 1.35, s                                     | 15.2, CH <sub>3</sub>    | 1.38, s                                     | 15.0, CH <sub>3</sub>                 | 1.36, s                                     |
| 31          | 16.2, CH <sub>3</sub>    | 1.52, s                                     | 16.4, CH <sub>3</sub>    | 1.50, s                                     | 16.3, CH <sub>3</sub>                 | 1.47, s                                     |
| 32          | 143.8, CH                | 7.18, d (16.2)                              | 146.3, CH                | 7.30, d (16.0)                              | 195.3, C                              | 9.52, s                                     |
| 33          | 127.2, CH                | 6.07, d (16.2)                              | 127.6, CH                | 6.22, d (16.1)                              |                                       |                                             |
| 34          | 198.4, C                 |                                             | 201.2, C                 |                                             |                                       |                                             |
| 35          | 27.7, CH <sub>3</sub>    | 2.29, s                                     | 27.9, CH <sub>3</sub>    | 2.29, s                                     |                                       |                                             |
| NS1         | 96.6, CH                 | 4.44, dd (9.8, 1.6)                         | 96.6, CH                 | 4.79, d (10.0)                              | 98.1, CH                              | 4.63, dd (9.6, 2.0)                         |
| NS2         | 36.1, CH <sub>2</sub>    | 1.64, m; 2.69, d (14.7)                     | 37.8, CH <sub>2</sub>    | 1.79, m; 1.92, m                            | 36.7, CH <sub>2</sub>                 | 1.74, m; 2.72, m                            |



|                                       |                       |                       |                       |                      |                       |                               |
|---------------------------------------|-----------------------|-----------------------|-----------------------|----------------------|-----------------------|-------------------------------|
| NS3                                   | 91.6, C               |                       | 58.0, C               |                      | 92.2, C               |                               |
| NS4                                   | 53.8, CH              | 4.36, d (9.8)         | 55.4, CH              | 3.62, br s           | 55.2, CH              | 4.34, br s                    |
| NS5                                   | 69.4, CH              | 3.48, m               | 68.9, CH              | 3.93, m              | 70.0, CH              | 3.57, m                       |
| NS6                                   | 17.9, CH <sub>3</sub> | 1.16, d (6.1)         | 17.3, CH <sub>3</sub> | 1.17, d (6.0)        | 17.9, CH <sub>3</sub> | 1.12, d (6.1)                 |
| NS3-CH <sub>3</sub>                   | 25.4, CH <sub>3</sub> | 1.58, s               | 24.7, CH <sub>3</sub> | 1.35, s              | 26.0, CH <sub>3</sub> | 1.52, s                       |
| NS4-NHCO <sub>2</sub> -               | 157.4, C              |                       | 160.0, C              |                      | 160.1, C              |                               |
| NS4-NHCO <sub>2</sub> CH <sub>3</sub> | 52.9, CH <sub>3</sub> | 3.70, s               | 52.9, CH <sub>3</sub> | 3.68, s              | 53.0, CH <sub>3</sub> | 3.68, s                       |
| DG1                                   | 98.6, CH              | 4.83, d (4.1)         | 99.9, CH              | 4.83, d (3.7)        | 99.9, CH              | 4.82, d (4.4)                 |
| DG2                                   | 31.6, CH <sub>2</sub> | 1.77, m; 2.23, m      | 32.1, CH <sub>2</sub> | 1.75, m; 2.30, m     | 32.2, CH <sub>2</sub> | 1.75, m; 2.20, dd (15.1, 2.5) |
| DG3                                   | 66.8, CH              | 4.15, dt (3.0, 2.9)   | 67.8, CH              | 4.16, m              | 67.8, CH              | 4.16, dt (3.1, 3.0)           |
| DG4                                   | 74.5, CH              | 4.58, dd (9.8, 2.8)   | 76.1, CH              | 4.54, dd (9.8, 2.3)  | 76.1, CH              | 4.53, dd (9.6, 3.1)           |
| DG5                                   | 62.2, CH              | 4.35, dd (9.8, 1.4)   | 63.5, CH              | 4.39, m              | 63.5, CH              | 4.39, dq (9.6, 6.4)           |
| DG6                                   | 18.2, CH <sub>3</sub> | 1.13, d (6.3)         | 18.3, CH <sub>3</sub> | 1.13, overlapped     | 18.2, CH <sub>3</sub> | 1.13, d (6.4)                 |
| DG4-O <sub>2</sub> C-                 | 170.6, C              |                       | 172.1, C              |                      | 172.1, C              |                               |
| DG4-O <sub>2</sub> CCH <sub>3</sub>   | 21.2, CH <sub>3</sub> | 2.08, s               | 21.1, CH <sub>3</sub> | 2.09, s              | 21.0, CH <sub>3</sub> | 2.08, s                       |
| AM/DG'1                               | 92.7, CH              | 4.88, d (2.8)         | 93.7, CH              | 4.93, overlapped     | 92.9, CH              | 4.92, d (3.5)                 |
| AM/DG'2                               | 29.7, CH <sub>2</sub> | 1.75, m; 1.87, m      | 27.5, CH <sub>2</sub> | 1.87, m; 1.99, m     | 28.3, CH <sub>2</sub> | 1.73, m; 1.80, m              |
| AM/DG'3                               | 26.4, CH <sub>2</sub> | 1.95, m; 2.0, m       | 30.4, CH <sub>2</sub> | 1.86, m; 1.89, m     | 30.4, CH <sub>2</sub> | 1.86, m; 1.89, m              |
| AM/DG'4                               | 81.3, CH              | 3.20, ddd (10.4, 4.7) | 82.1, CH              | 3.21, ddd (9.8, 5.4) | 82.1, CH              | 3.21, ddd (9.4, 4.5)          |
| AM/DG'5                               | 68.0, CH              | 3.70, m               | 69.3, CH              | 3.66, overlapped     | 69.3, CH              | 3.66, m                       |
| AM/DG'6                               | 17.6, CH <sub>3</sub> | 1.13, d (6.3)         | 17.4, CH <sub>3</sub> | 1.13, overlapped     | 17.3, CH <sub>3</sub> | 1.11, d (6.3)                 |
| DG''1                                 | 99.5, CH              | 4.89, dd (9.8, 1.8)   | 100.6, CH             | 4.93, overlapped     | 100.6, CH             | 4.93, d (9.0)                 |
| DG''2                                 | 37.1, CH <sub>2</sub> | 1.67, m; 2.14, m      | 39.2, CH <sub>2</sub> | 1.62, m; 2.01, m     | 39.2, CH <sub>2</sub> | 1.62, m; 2.01, m              |
| DG''3                                 | 64.0, CH              | 4.25, dt (3.1, 2.7)   | 64.0, CH              | 4.26, overlapped     | 64.0, CH              | 4.26, dt (3.1, 2.9)           |
| DG''4                                 | 75.3, CH              | 3.44, m               | 76.4, CH              | 3.28, dd (9.5, 2.0)  | 76.4, CH              | 3.27, dd (9.5, 2.7)           |
| DG''5                                 | 67.9, CH              | 3.85, dq (9.5, 6.3)   | 69.5, CH              | 3.91, m              | 69.5, CH              | 3.91, dq (9.5, 6.2)           |
| DG''6                                 | 19.0, CH <sub>3</sub> | 1.31, d (6.2)         | 19.3, CH <sub>3</sub> | 1.29, d (6.2)        | 19.3, CH <sub>3</sub> | 1.29, d (6.1)                 |
| AM'1                                  | 92.0, CH              | 4.92, br s            | 92.9, CH              | 4.92, br s           | 93.7, CH              | 4.93, br s                    |
| AM'2                                  | 27.5, CH <sub>2</sub> | 1.72, m; 1.88, m      | 28.3, CH <sub>2</sub> | 1.73, m; 1.80, m     | 27.5, CH <sub>2</sub> | 1.87, m; 1.99, m              |
| AM'3                                  | 29.8, CH <sub>2</sub> | 1.80, m; 1.87, m      | 30.4, CH <sub>2</sub> | 1.72, m; 1.75, m     | 30.4, CH <sub>2</sub> | 1.72, m; 1.75, m              |
| AM'4                                  | 71.8, CH              | 3.28, dd (4.3, 10.5)  | 72.6, CH              | 3.13, dd (9.7, 4.9)  | 72.6, CH              | 3.13, ddd (9.8, 4.5)          |
| AM'5                                  | 70.4, CH              | 3.62, dq (9.1, 6.3)   | 71.4, CH              | 3.59, m              | 71.4, CH              | 3.59, m                       |
| AM'6                                  | 17.8, CH <sub>3</sub> | 1.23, d (6.2)         | 18.4, CH <sub>3</sub> | 1.20, d (6.1)        | 18.4, CH <sub>3</sub> | 1.19, d (6.1)                 |

<sup>a</sup> Recorded in CDCl<sub>3</sub>; <sup>b</sup> recorded in CD<sub>3</sub>OD.

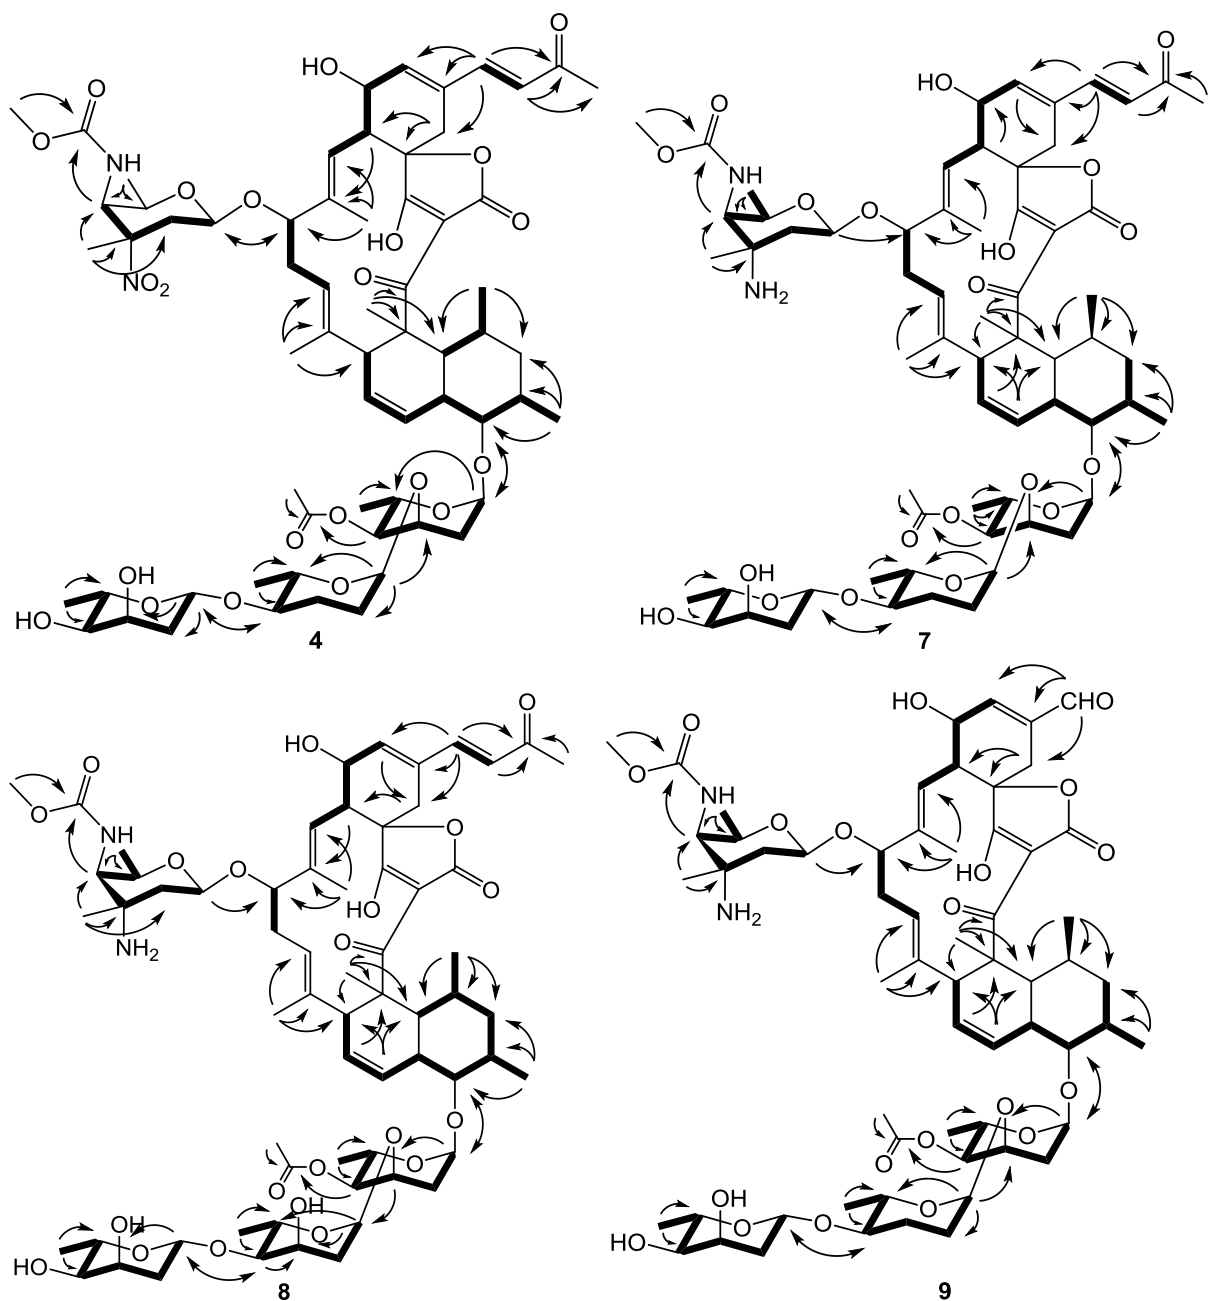

**Figure S1.** COSY (bold) and selected HMBC (arrow) correlations for microsporanates B, E–F, and tetrocarcin P (4, 7–8, and 9, respectively).

**Figure S2.**  $^1\text{H}$  NMR (500 MHz) spectrum of compound **1** in  $\text{CDCl}_3$ .

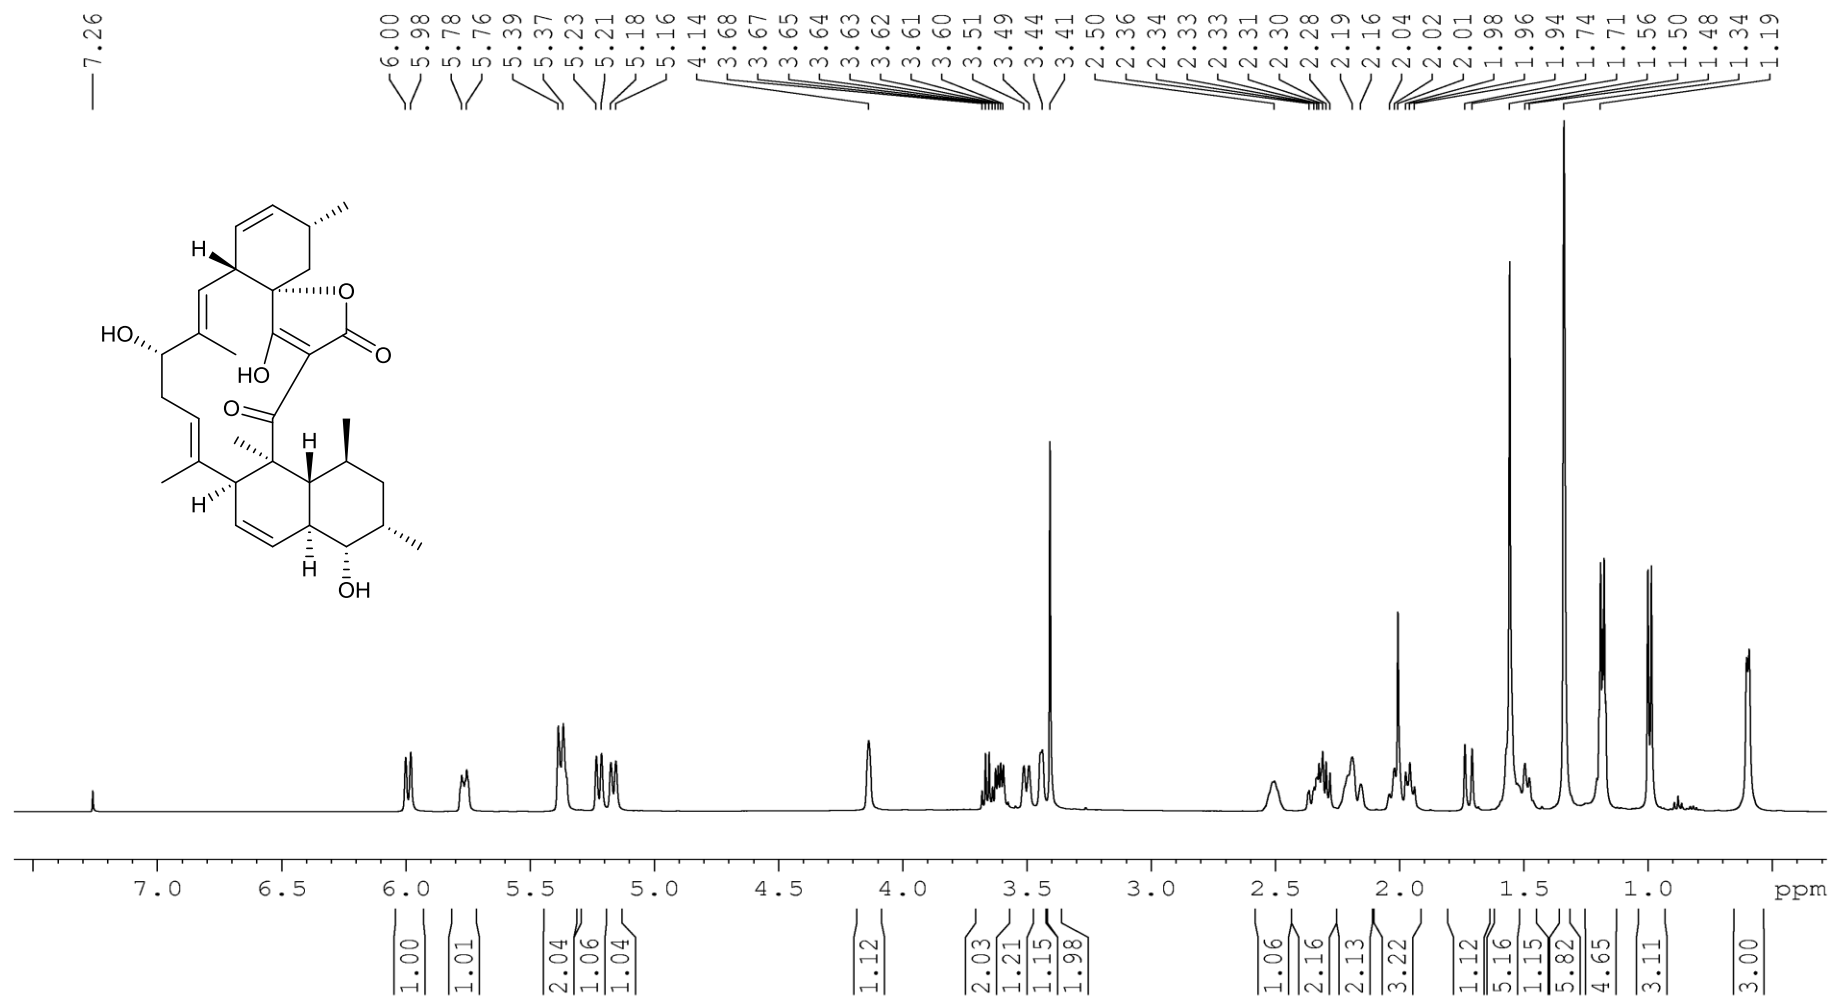

**Figure S3.**  $^{13}\text{C}$  NMR (125 MHz) spectrum of compound **1** in  $\text{CDCl}_3$ .

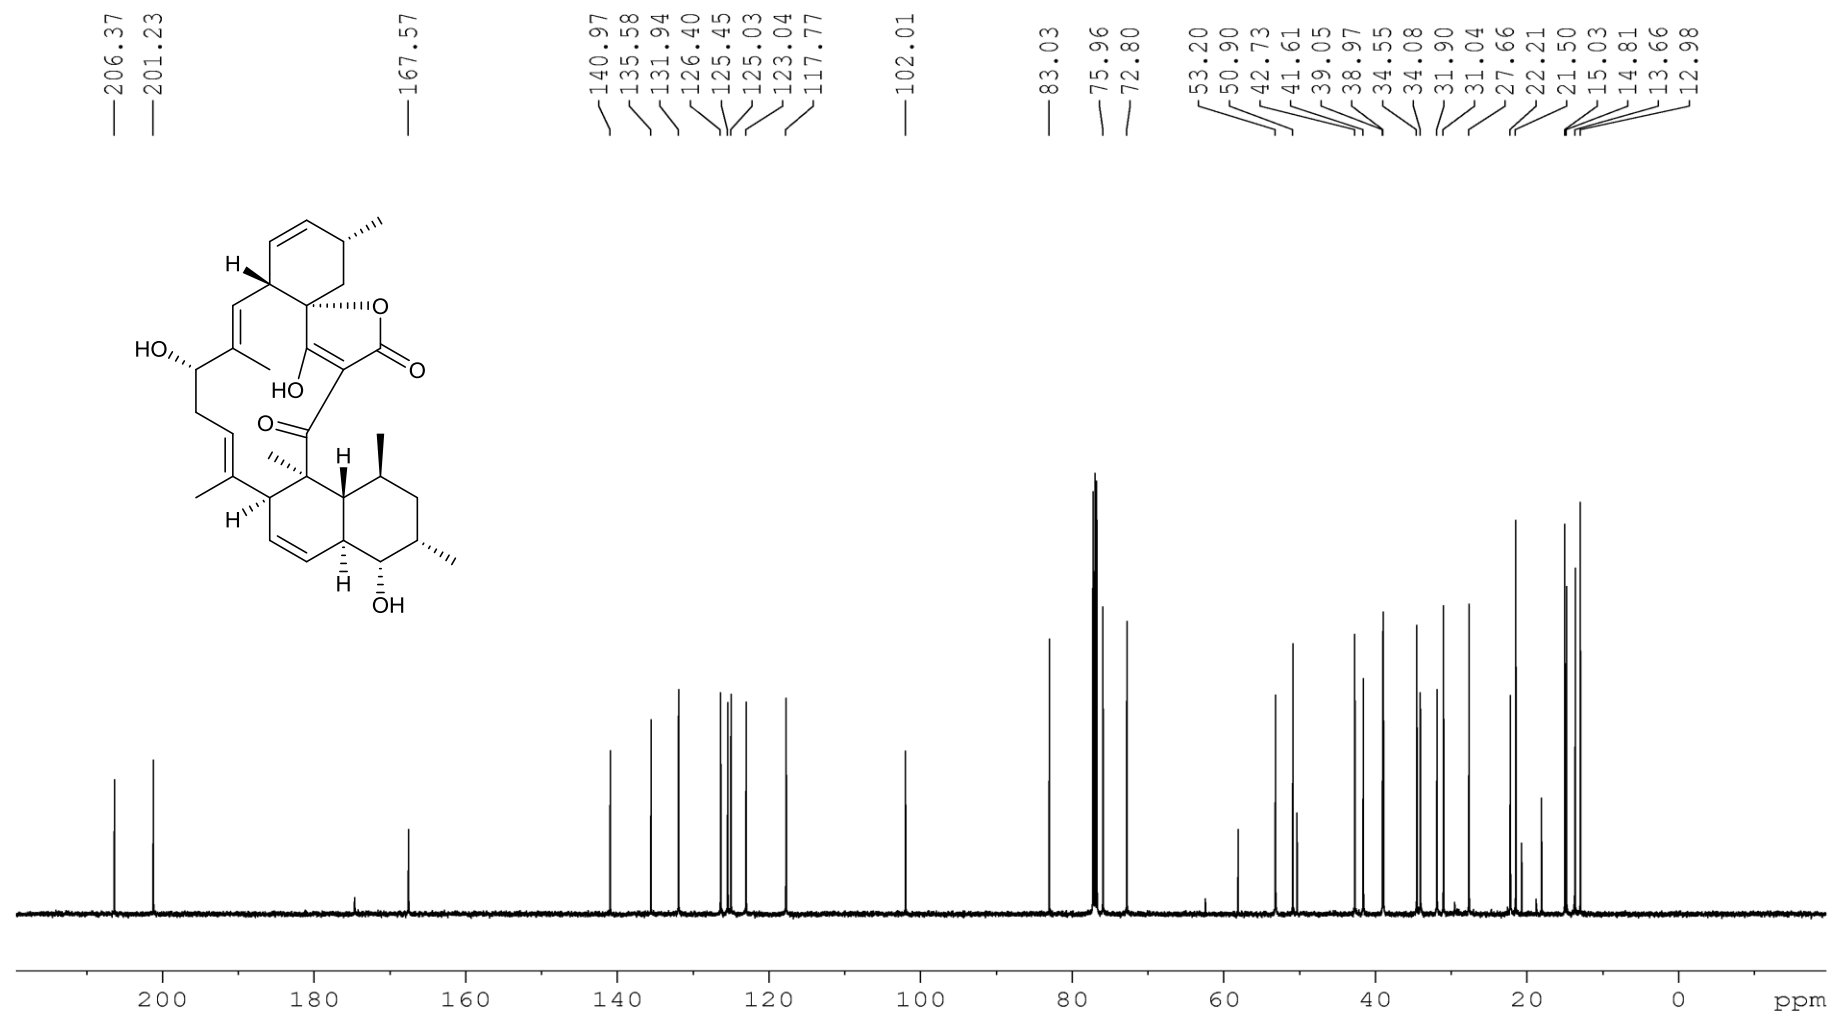

**Figure S4.**  $^{13}\text{C}$  DEPT spectrum of compound **1** in  $\text{CDCl}_3$ .

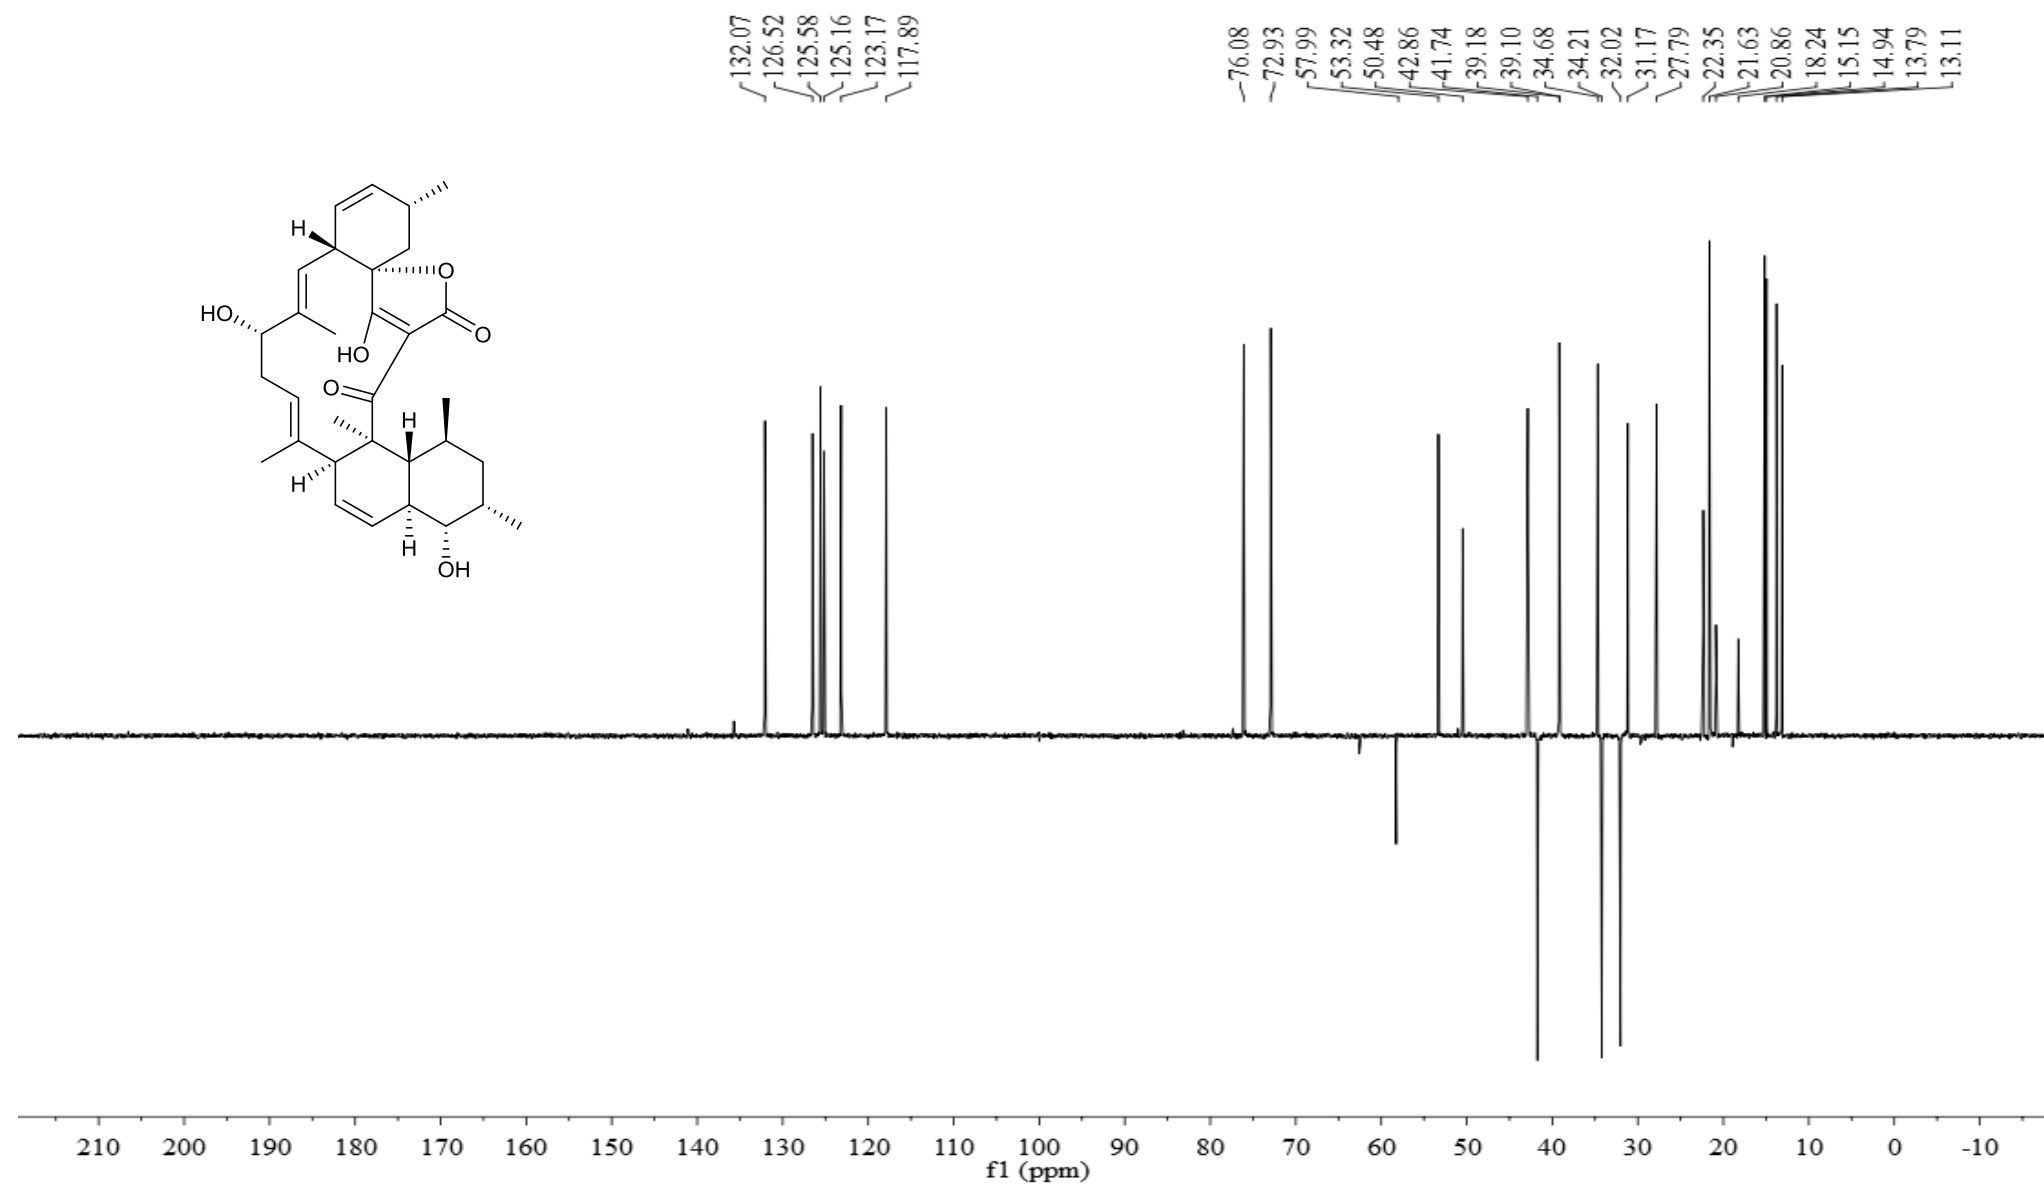

**Figure S5.**  $^1\text{H}$ - $^1\text{H}$  COSY spectrum of compound **1** in  $\text{CDCl}_3$ .

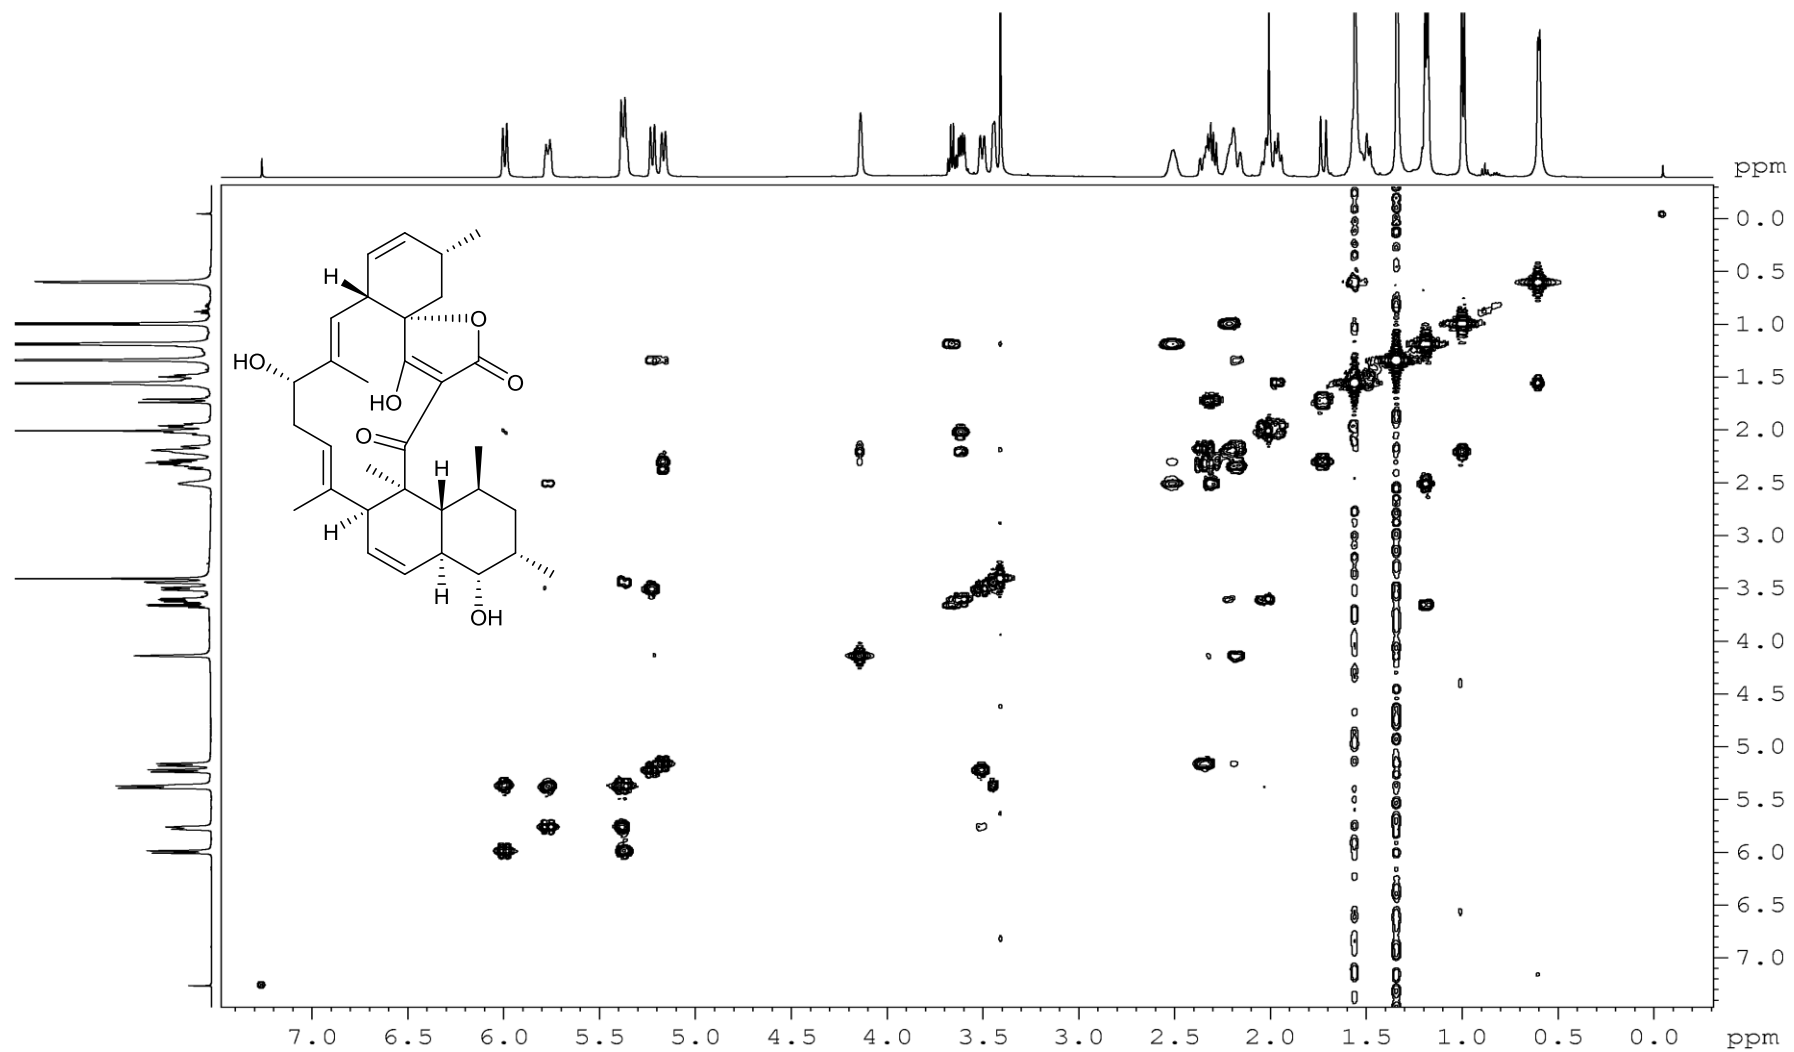

**Figure S6.** HSQC spectrum of compound **1** in CDCl<sub>3</sub>.

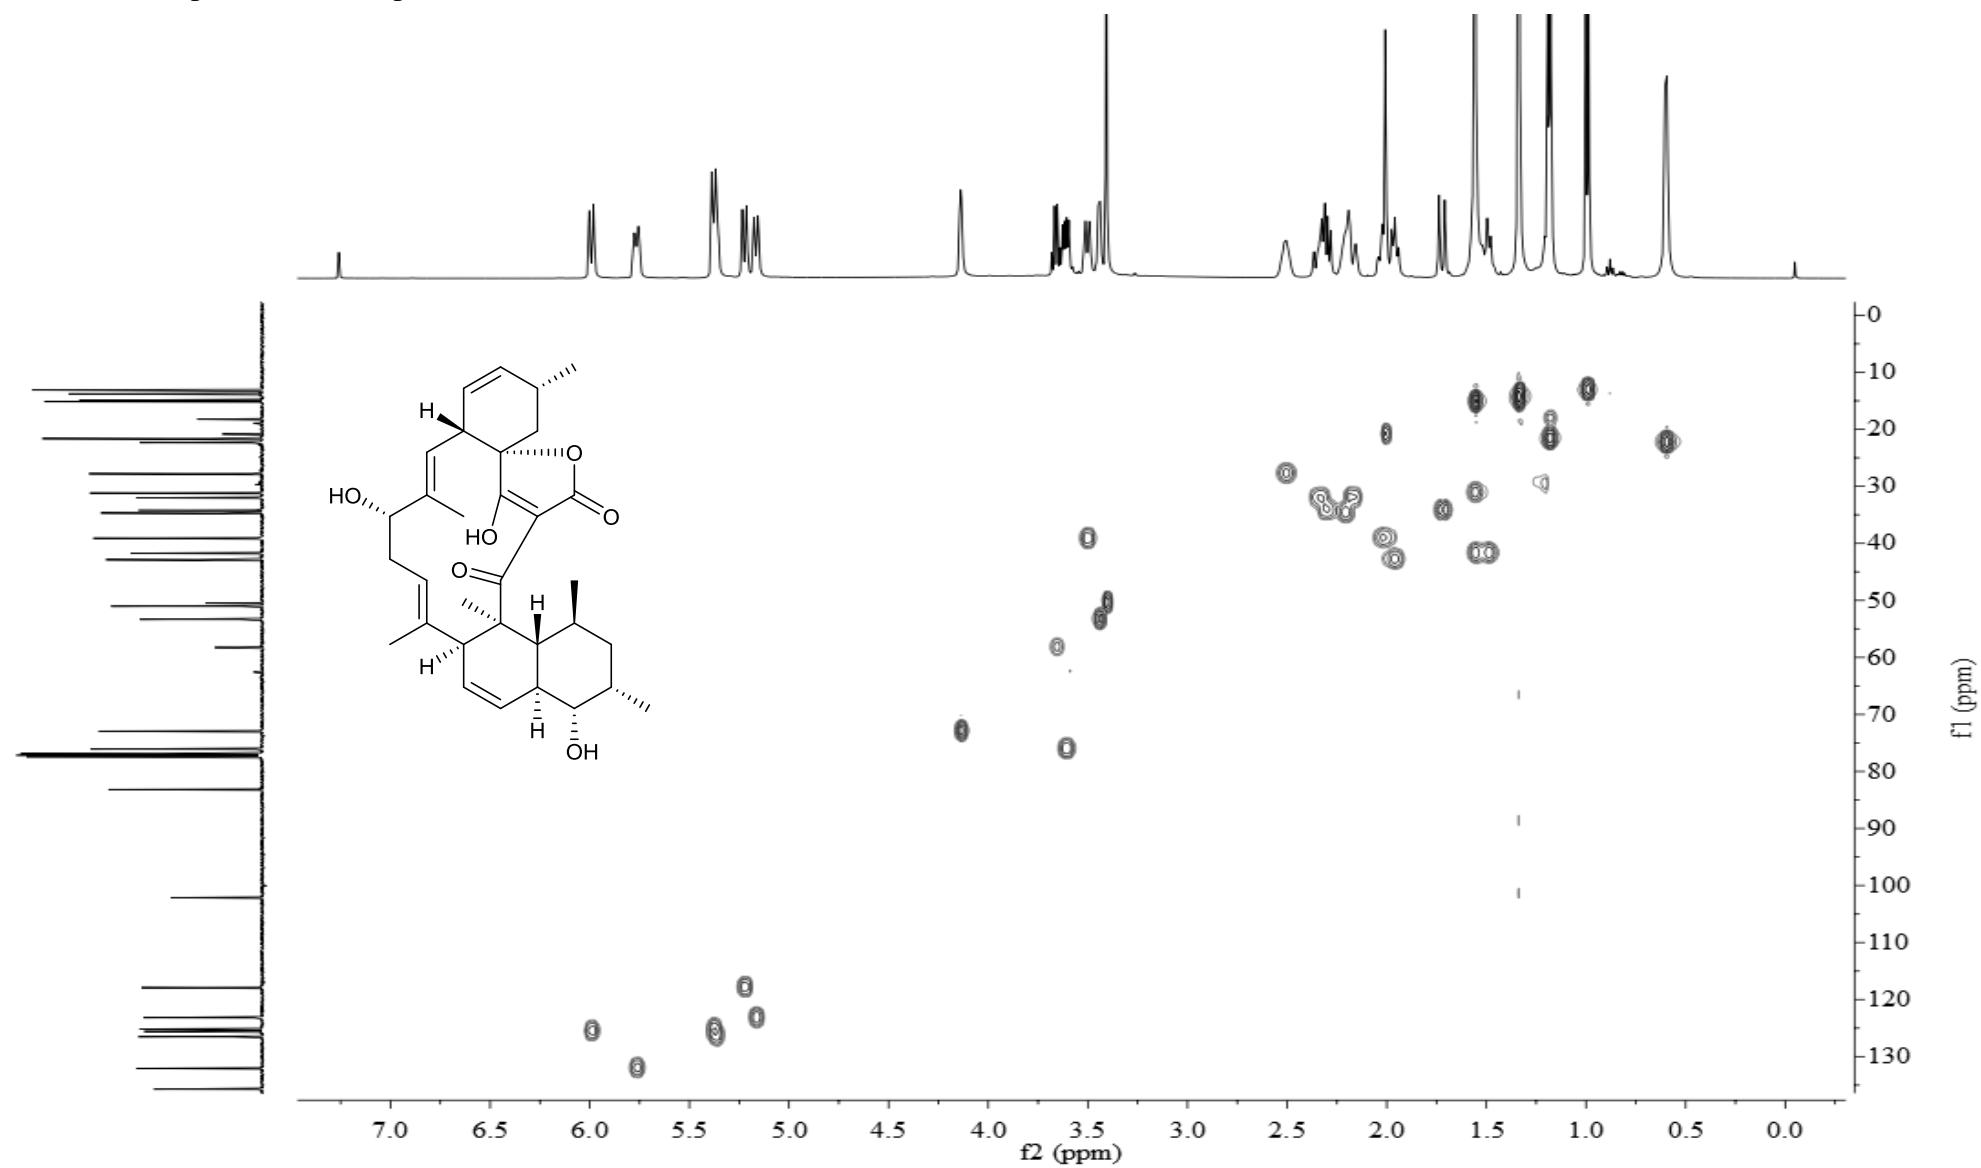

**Figure S7.** HMBC spectrum of compound **1** in CDCl<sub>3</sub>.

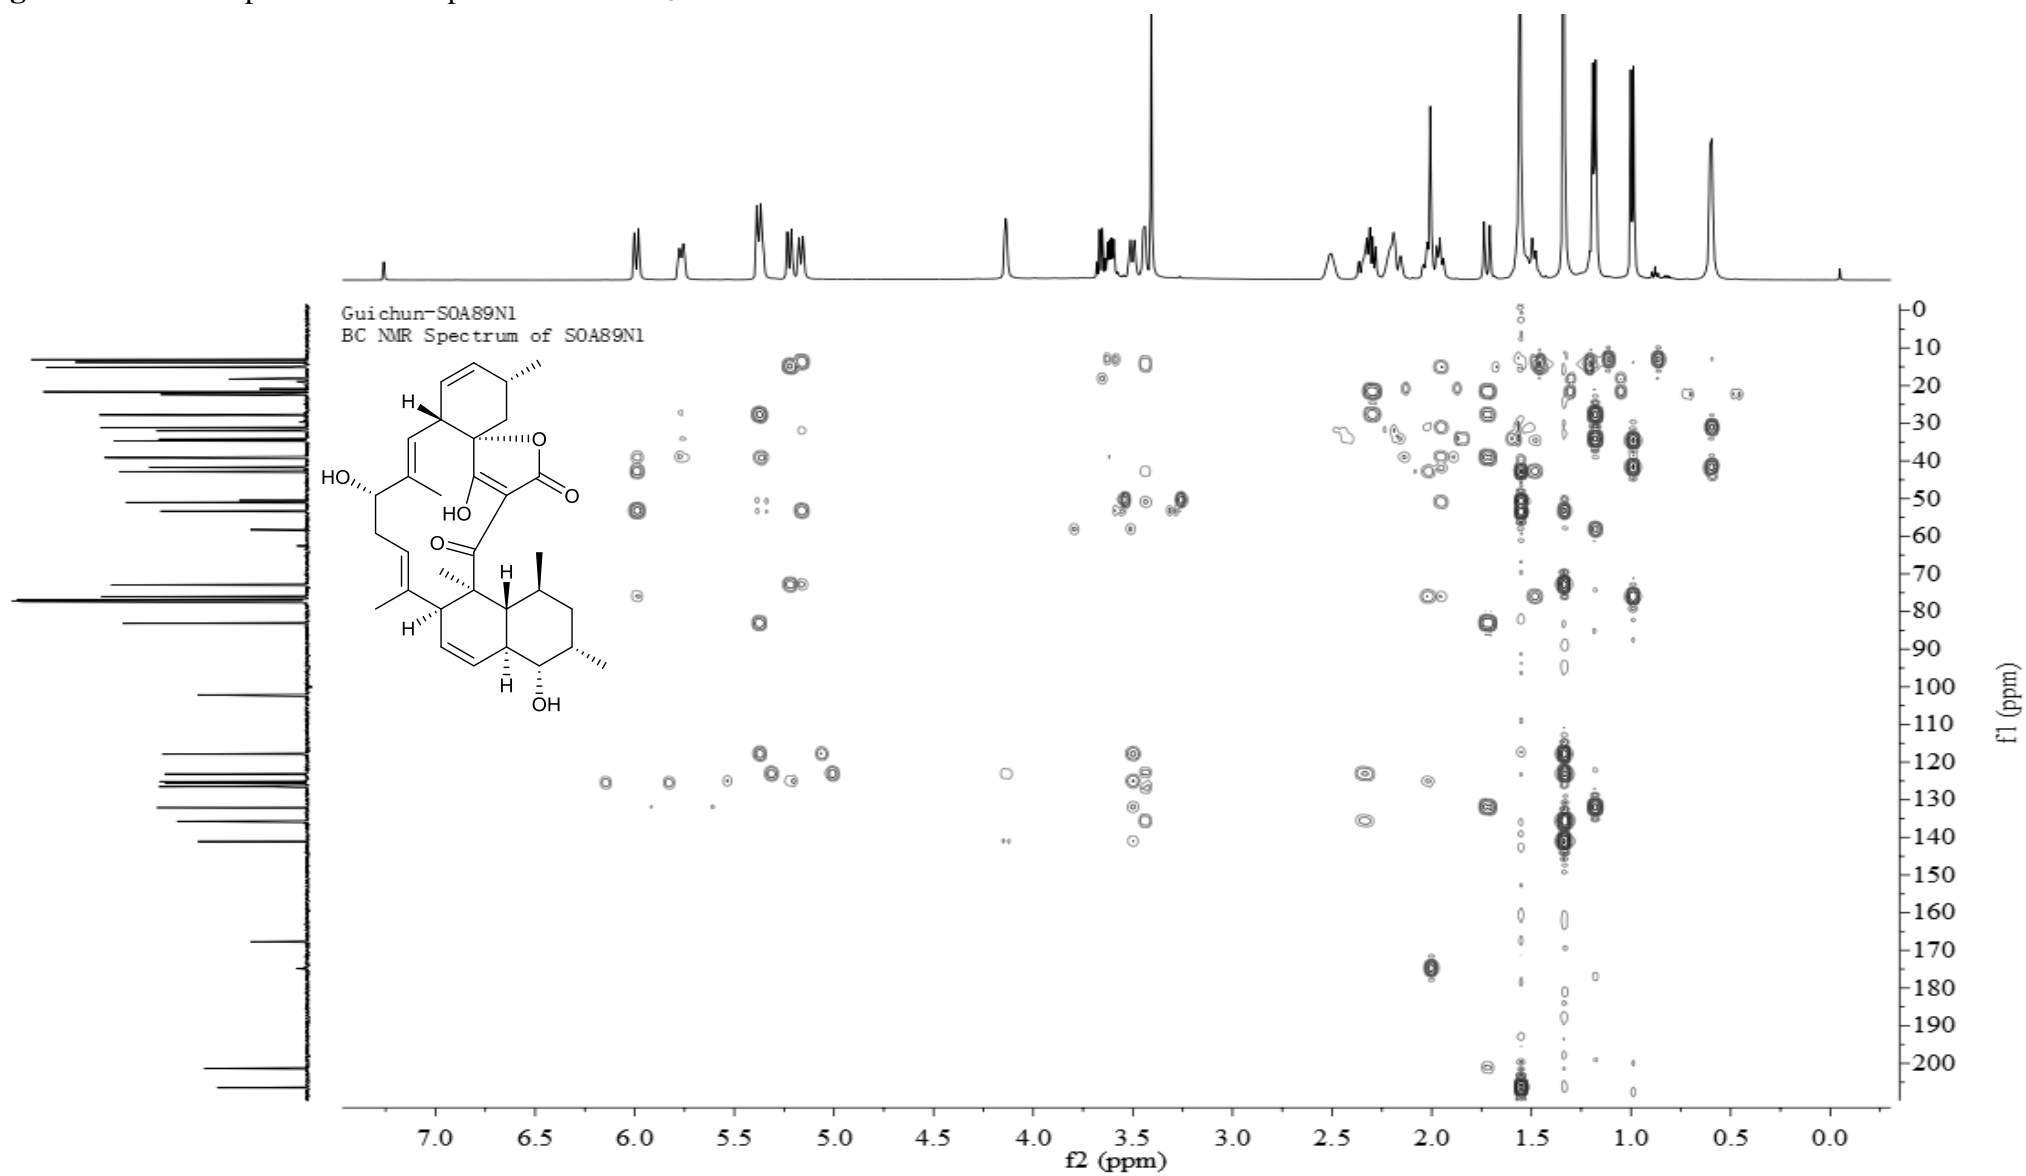



**Figure S8.** NOESY spectrum of compound **1** in CDCl<sub>3</sub>.

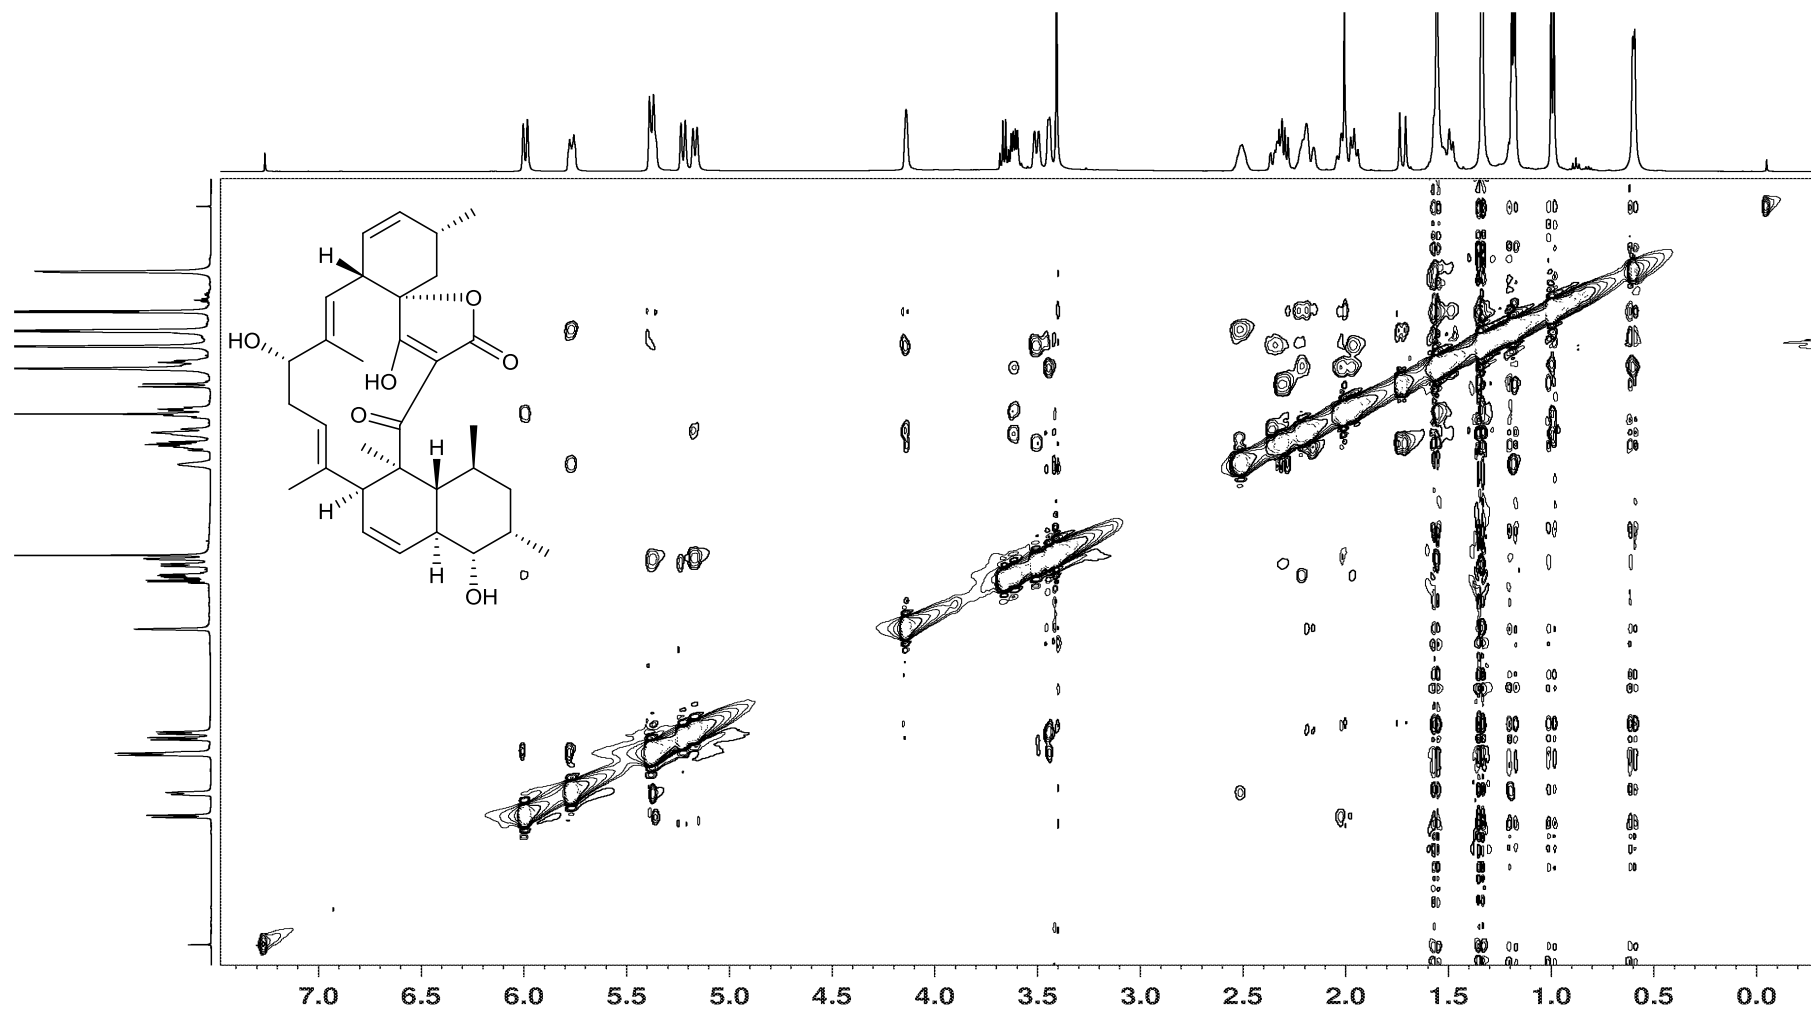

**Figure S9.**  $^1\text{H}$  NMR (500 MHz) spectrum of compound **2** in  $\text{CDCl}_3$  /  $\text{CD}_3\text{OD}$ .

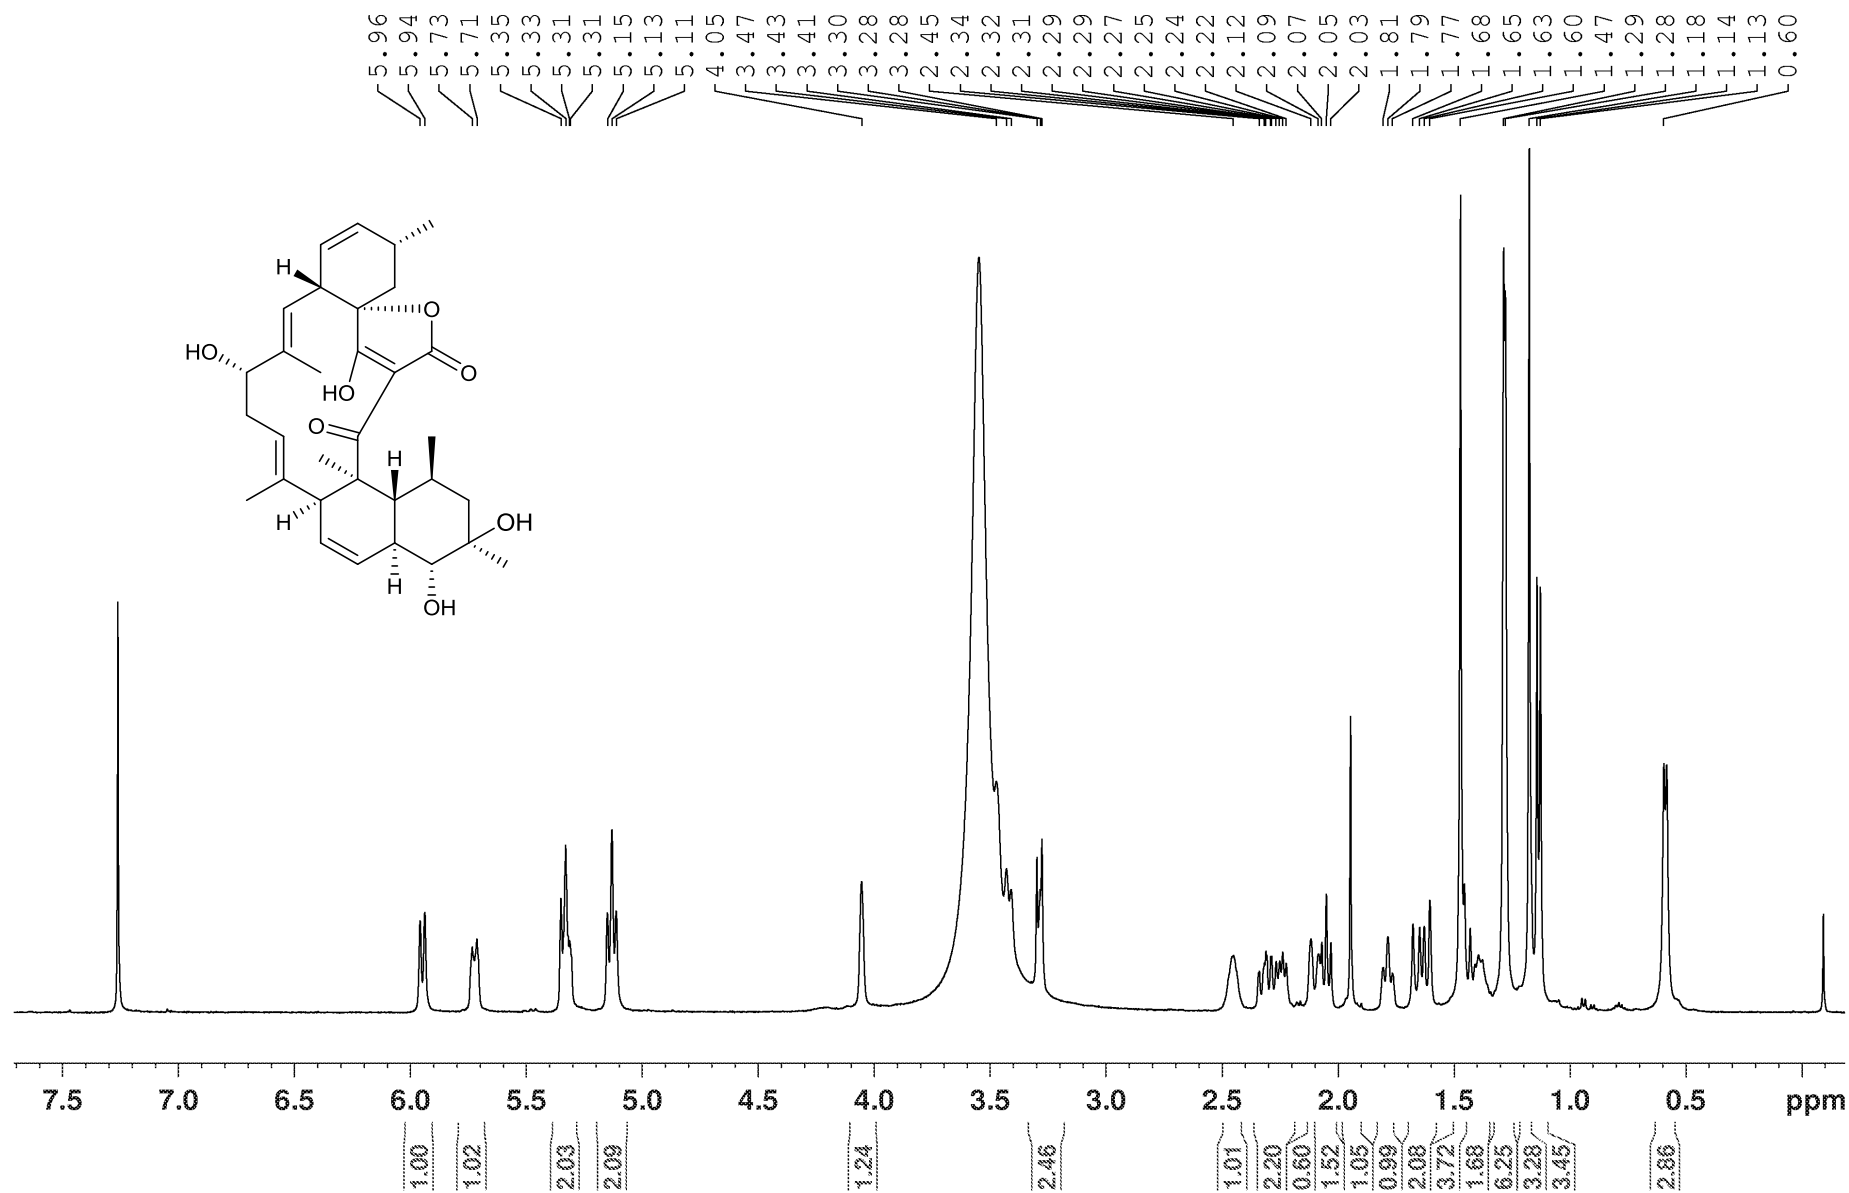

**Figure S10.**  $^{13}\text{C}$  NMR (125 MHz) spectrum of compound **2** in  $\text{CDCl}_3/\text{CD}_3\text{OD}$ .

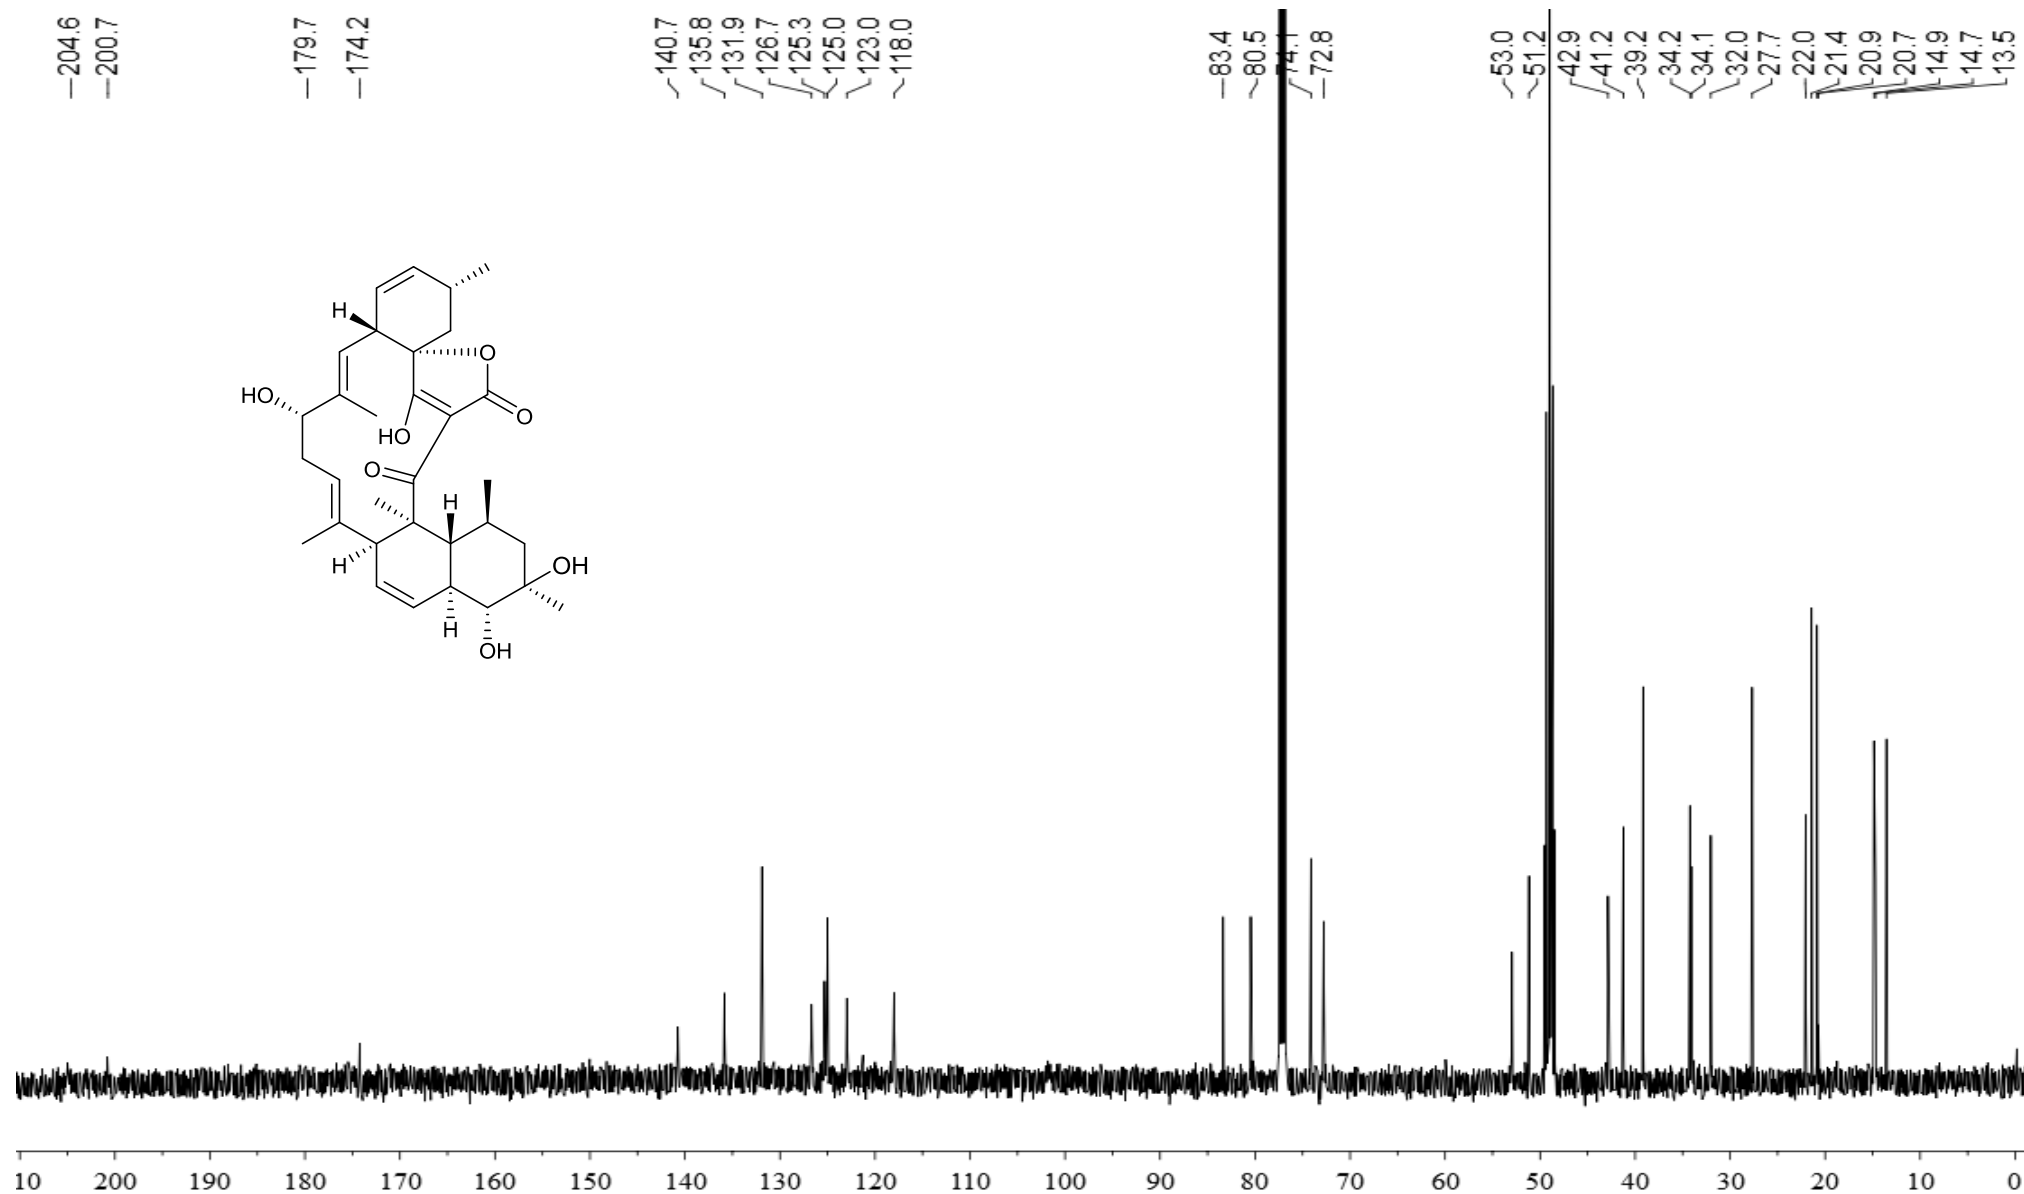

**Figure S11.**  $^{13}\text{C}$  DEPT spectrum of compound **2** in  $\text{CDCl}_3/\text{CD}_3\text{OD}$ .

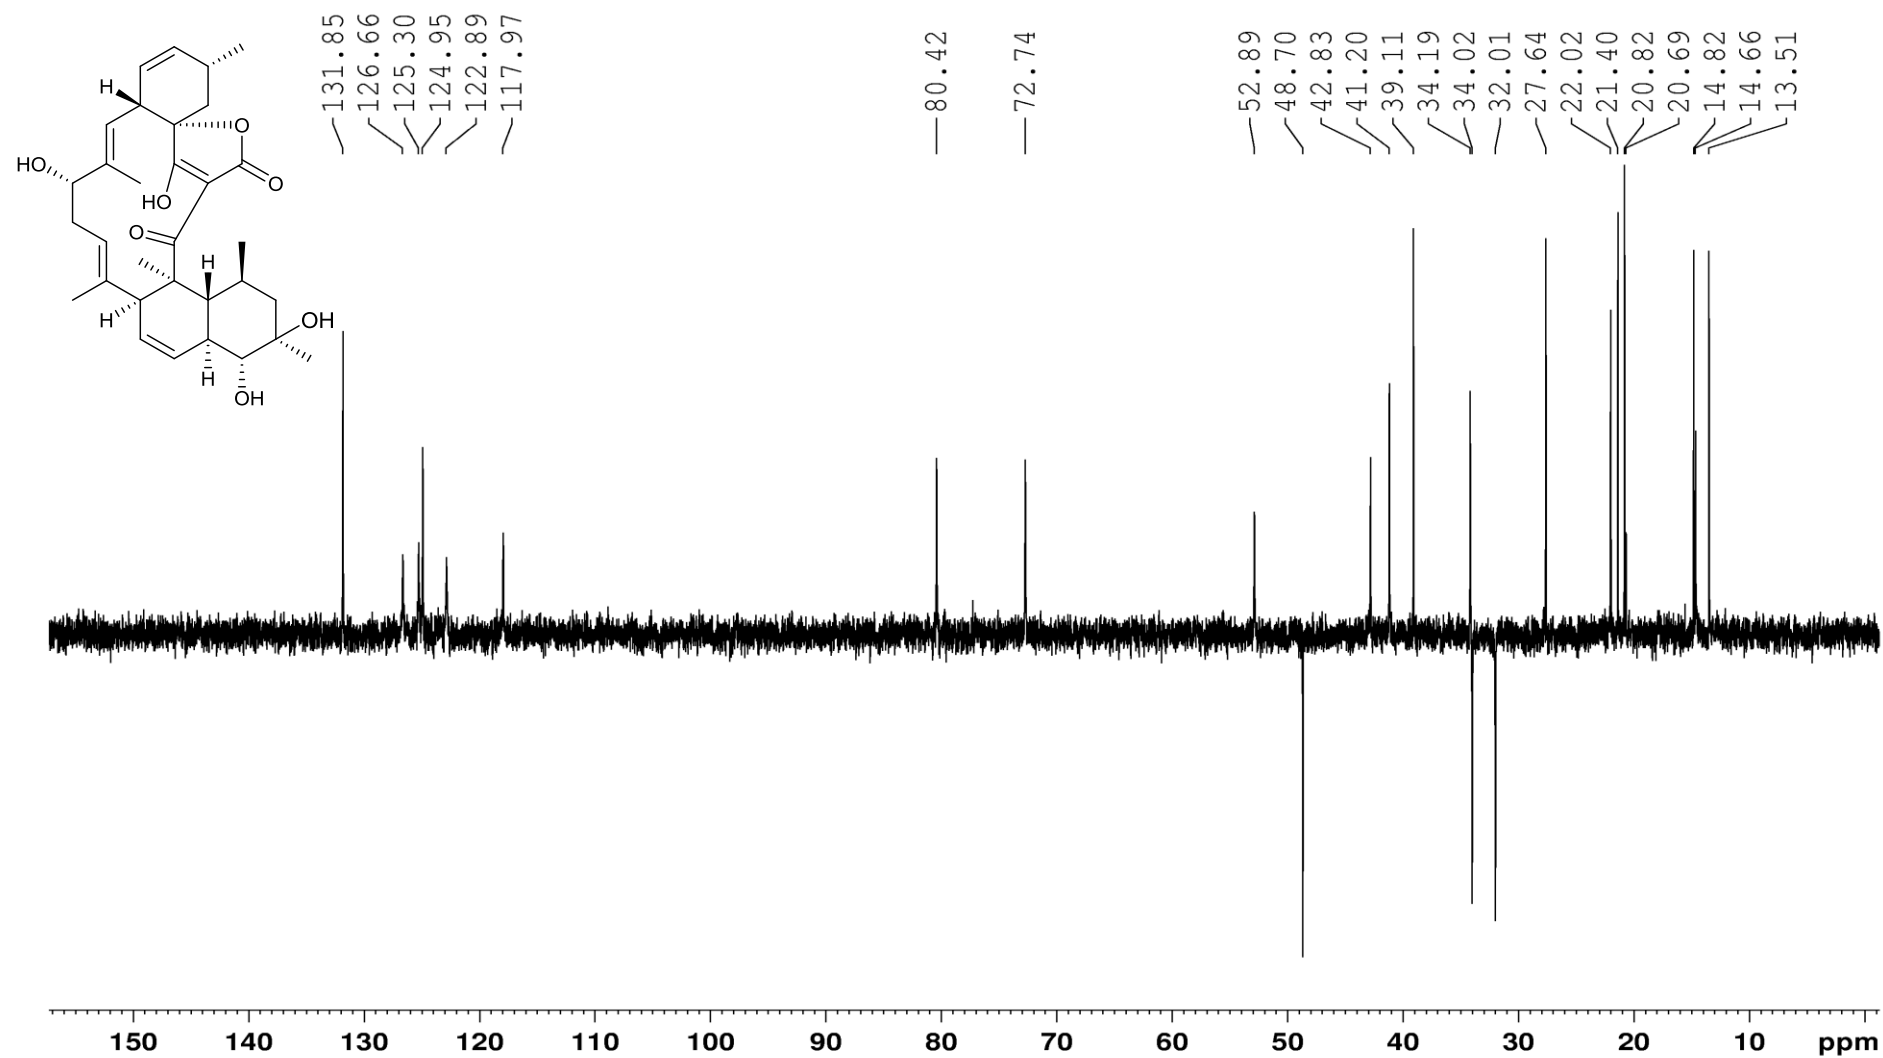

**Figure S12.**  $^1\text{H}$ - $^1\text{H}$  COSY spectrum of compound **2** in  $\text{CDCl}_3/\text{CD}_3\text{OD}$ .

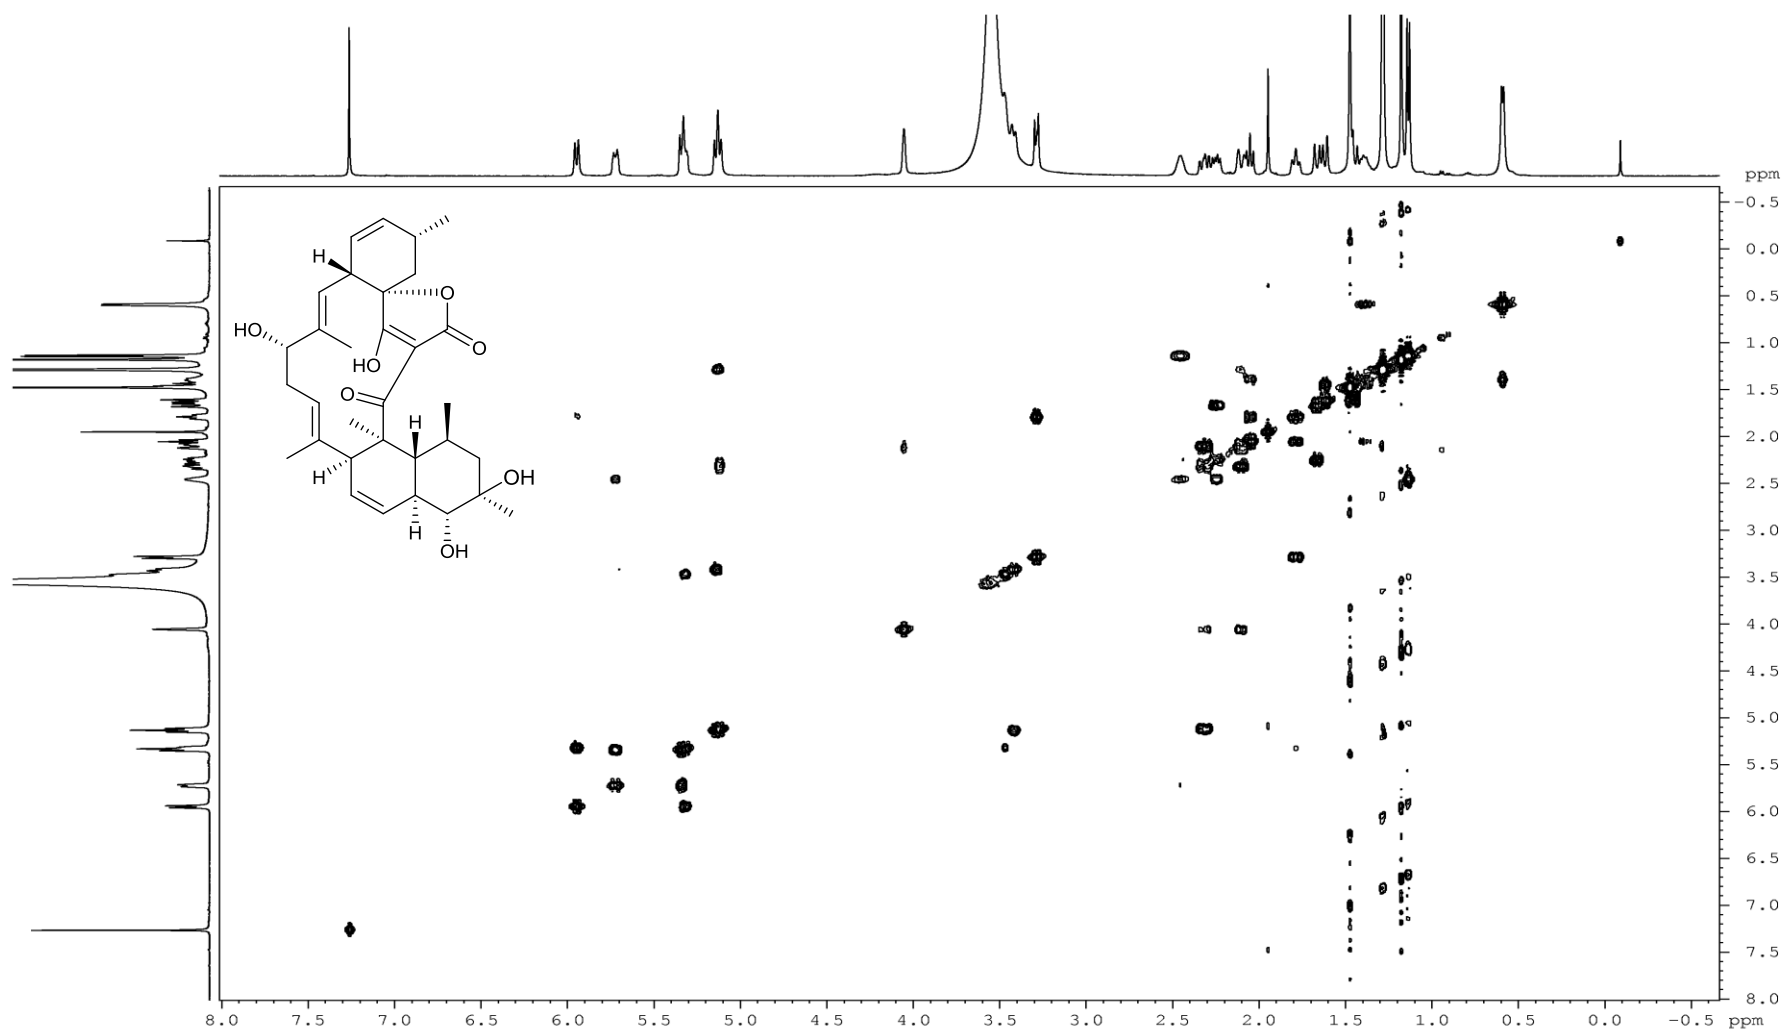

**Figure S13.** HSQC spectrum of compound **2** in CDCl<sub>3</sub>/CD<sub>3</sub>OD.

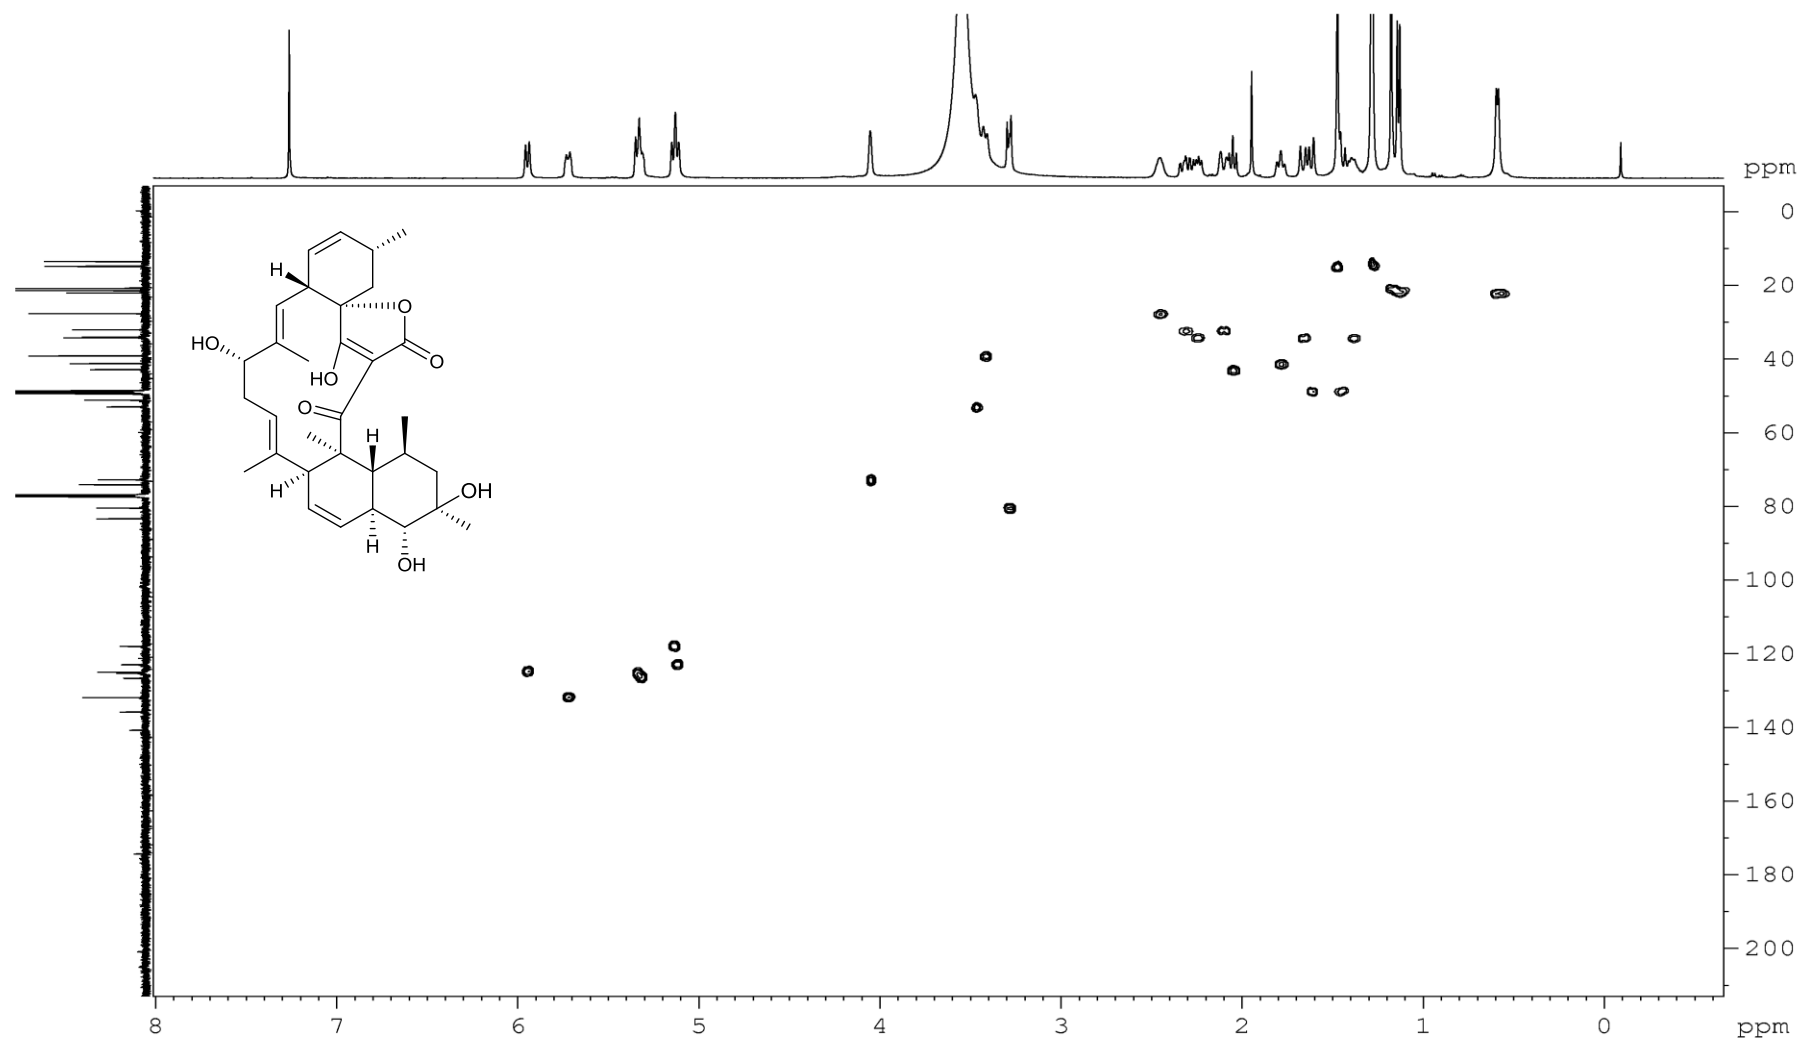

**Figure S14.** HMBC spectrum of compound **2** in CDCl<sub>3</sub>/CD<sub>3</sub>OD.

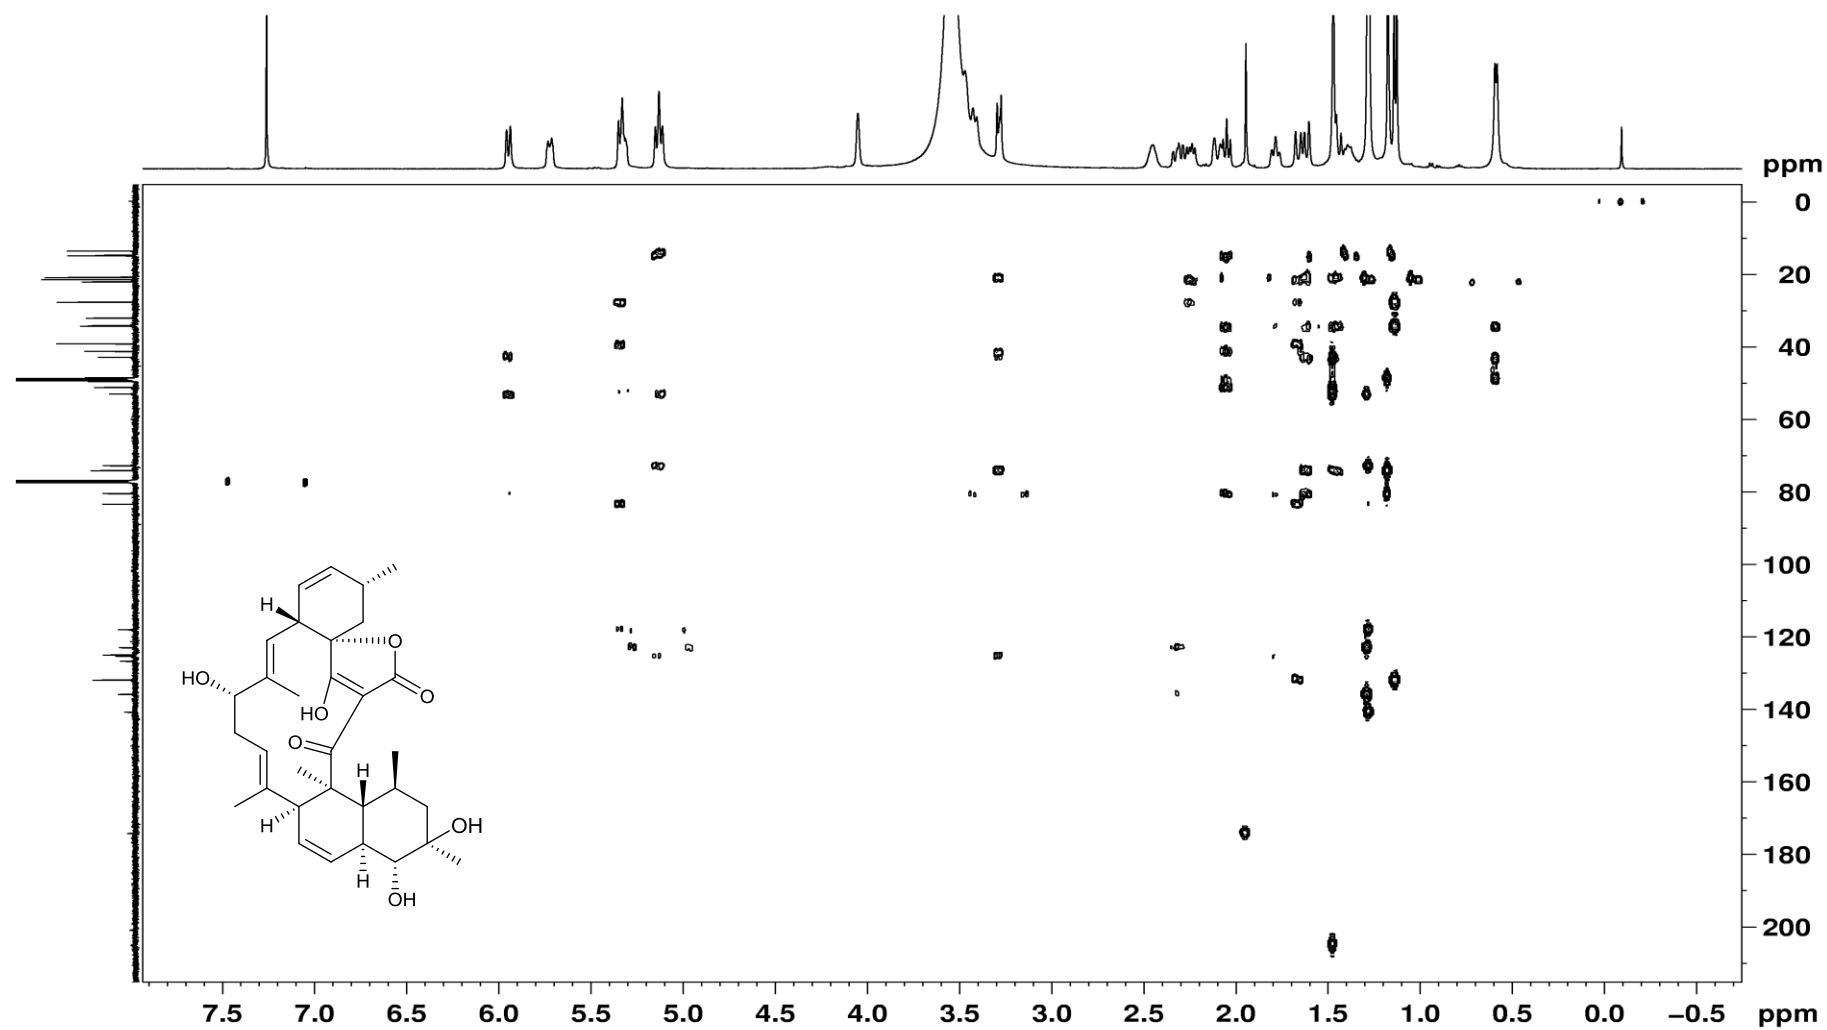

**Figure S15.** NOESY spectrum of compound **2** in CDCl<sub>3</sub>/CD<sub>3</sub>OD.

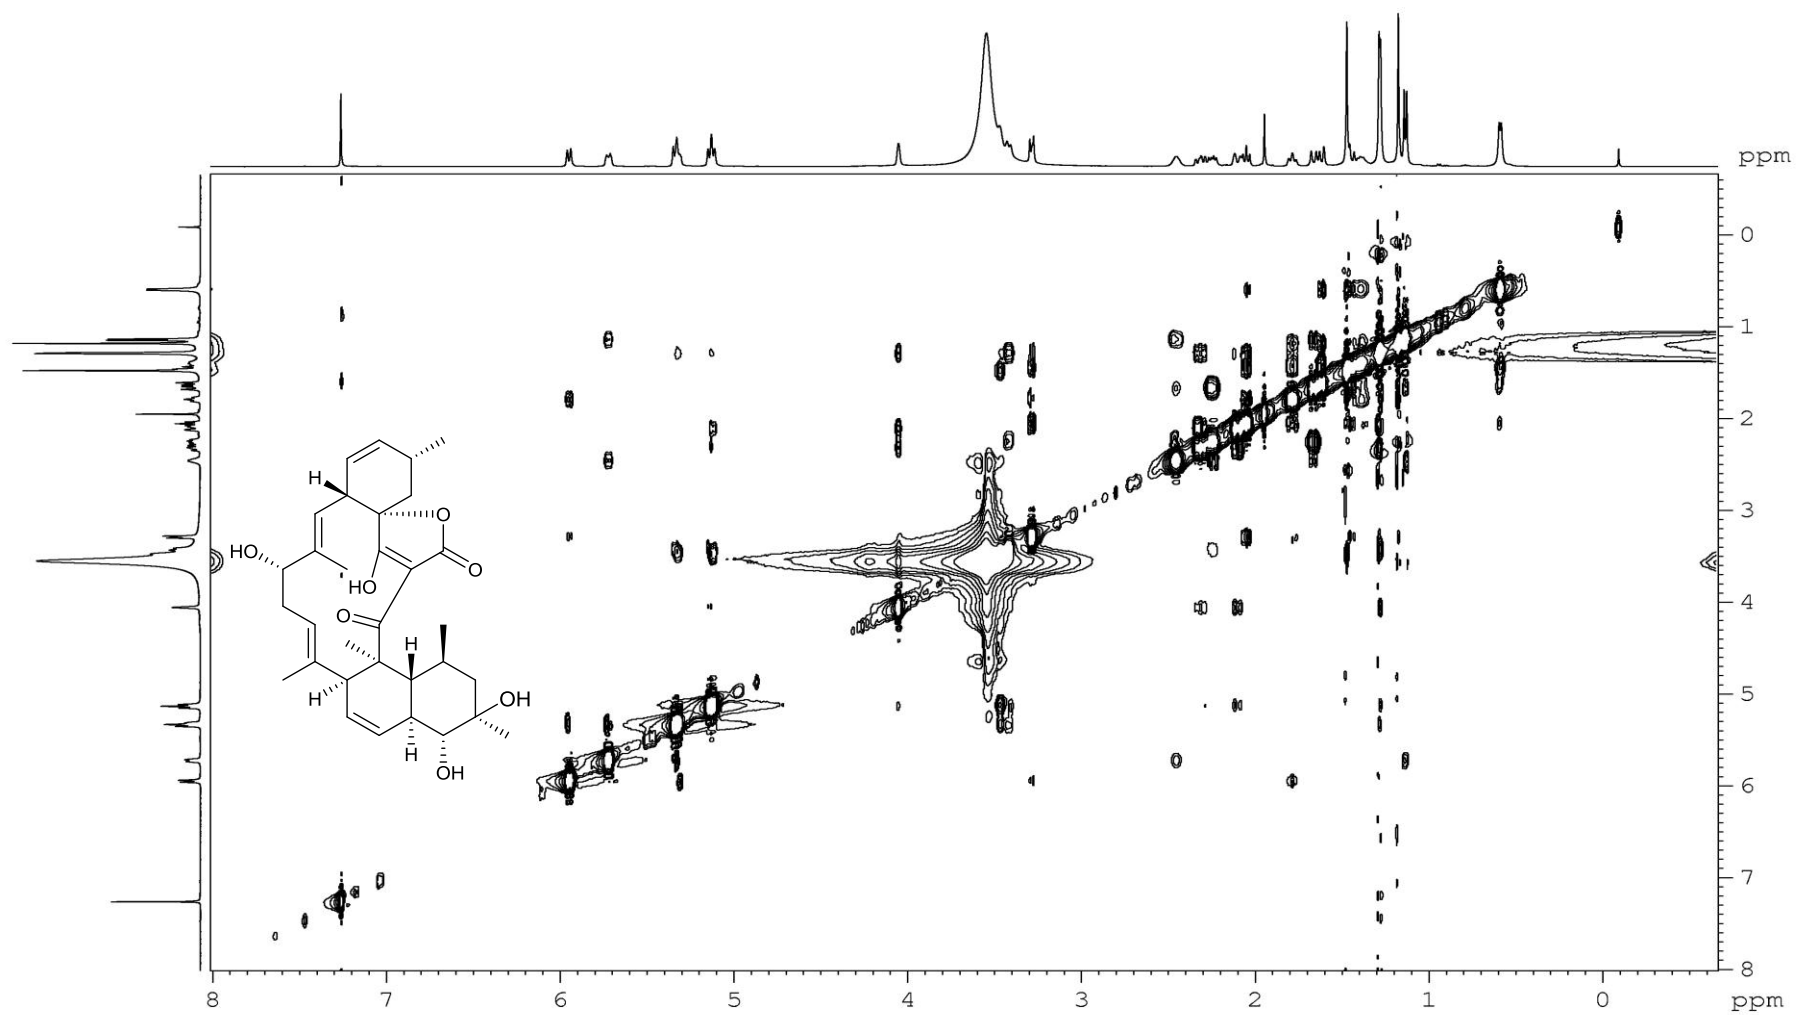



**Figure S16.**  $^1\text{H}$  NMR (500 MHz) spectrum of compound **3** in  $\text{CDCl}_3$ .

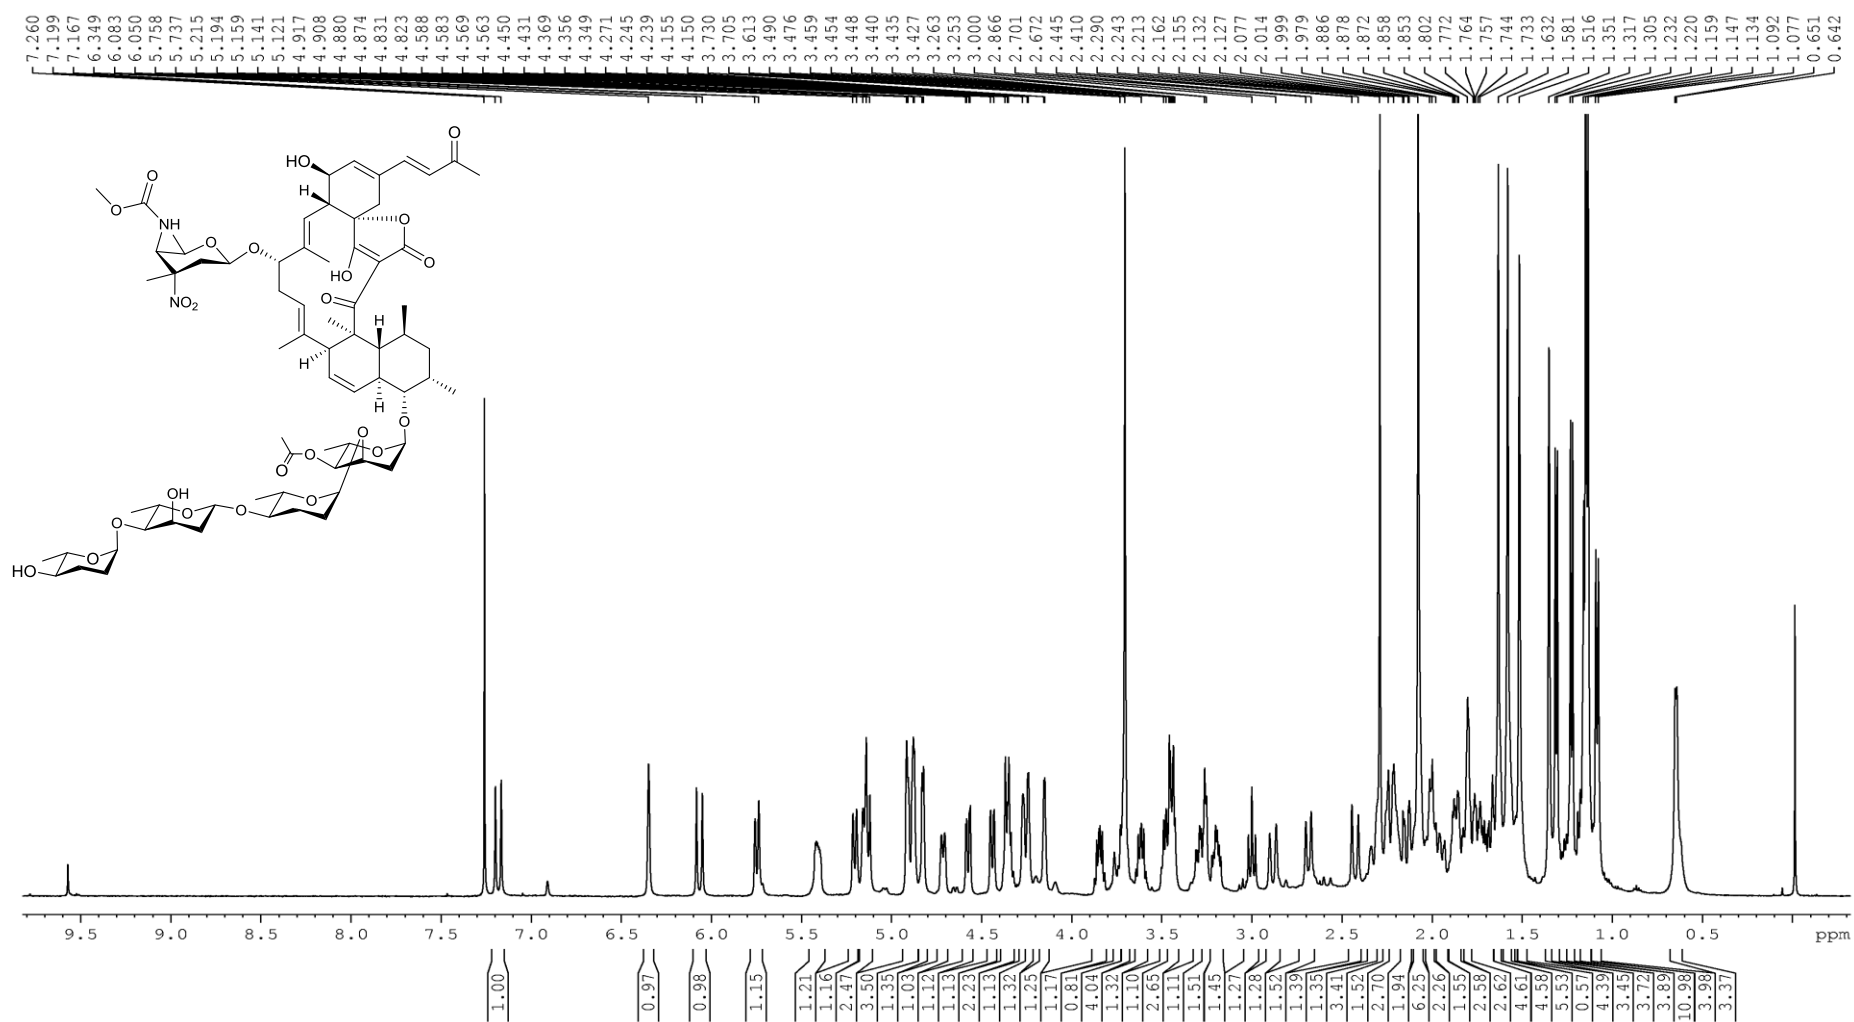

**Figure S17.**  $^{13}\text{C}$  NMR (125 MHz) spectrum of compound **3** in  $\text{CDCl}_3$ .

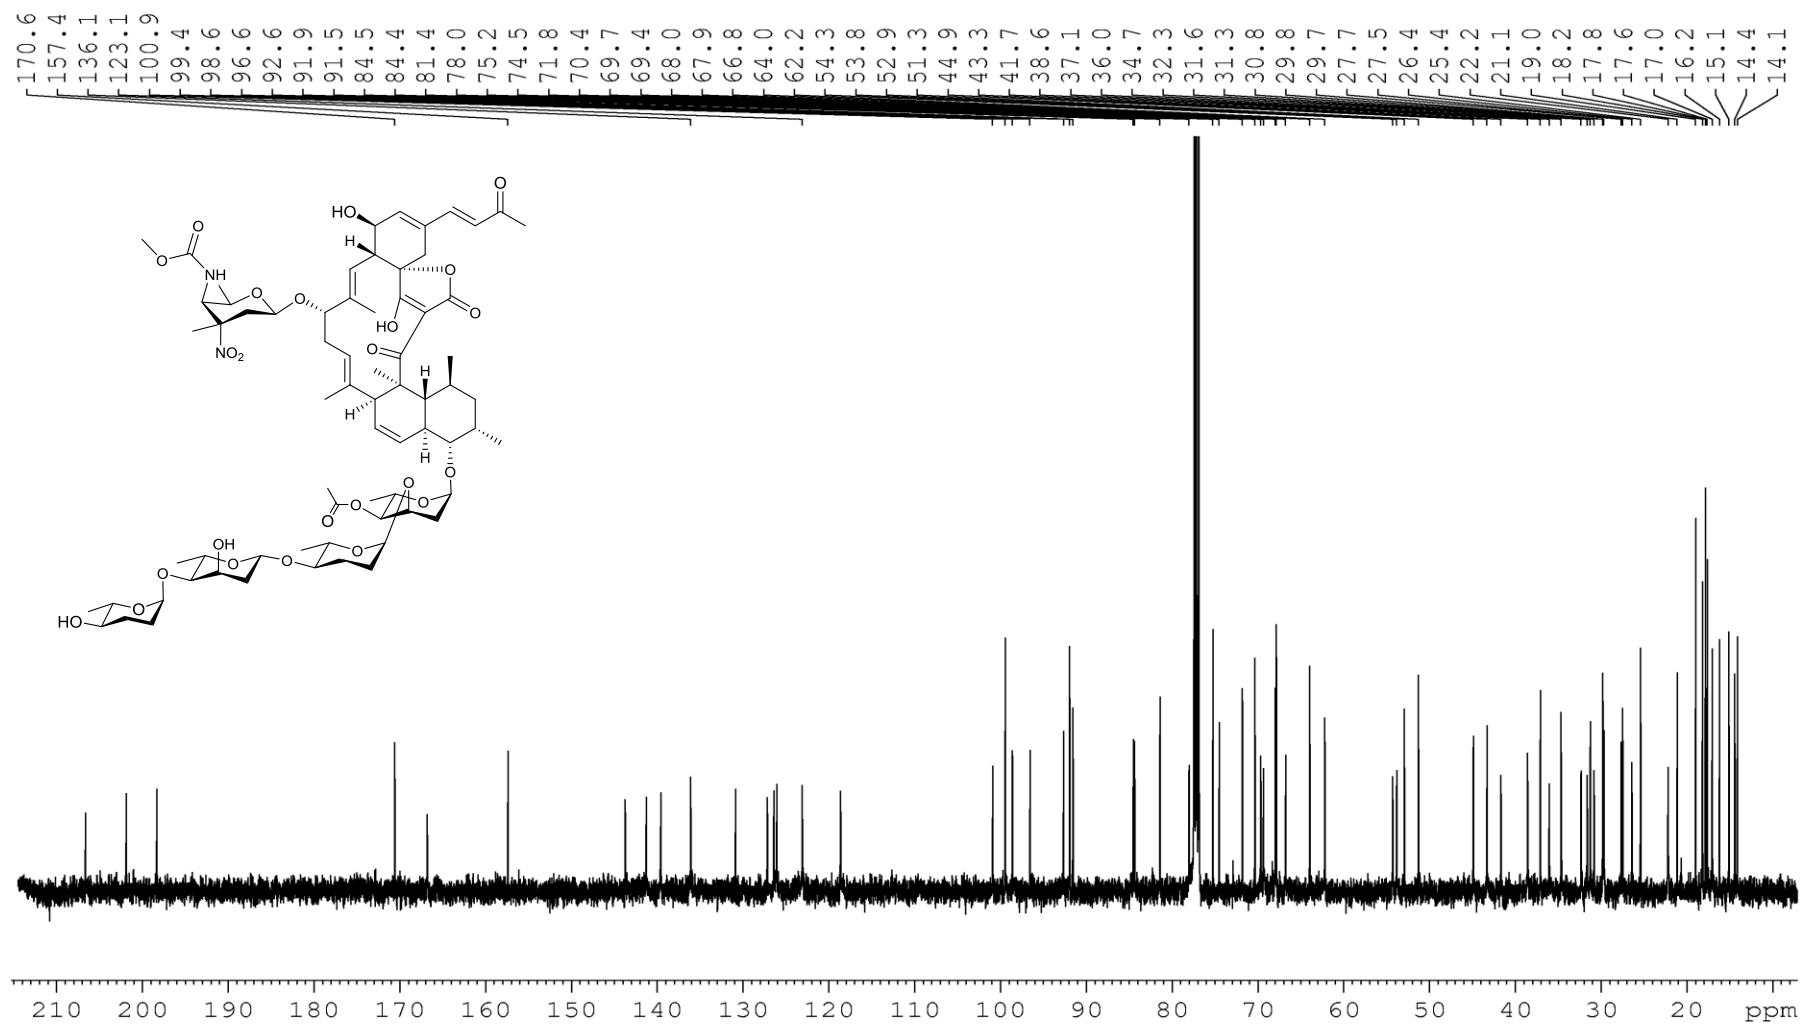

**Figure S18.**  $^{13}\text{C}$  DEPT spectrum of compound **3** in  $\text{CDCl}_3$ .

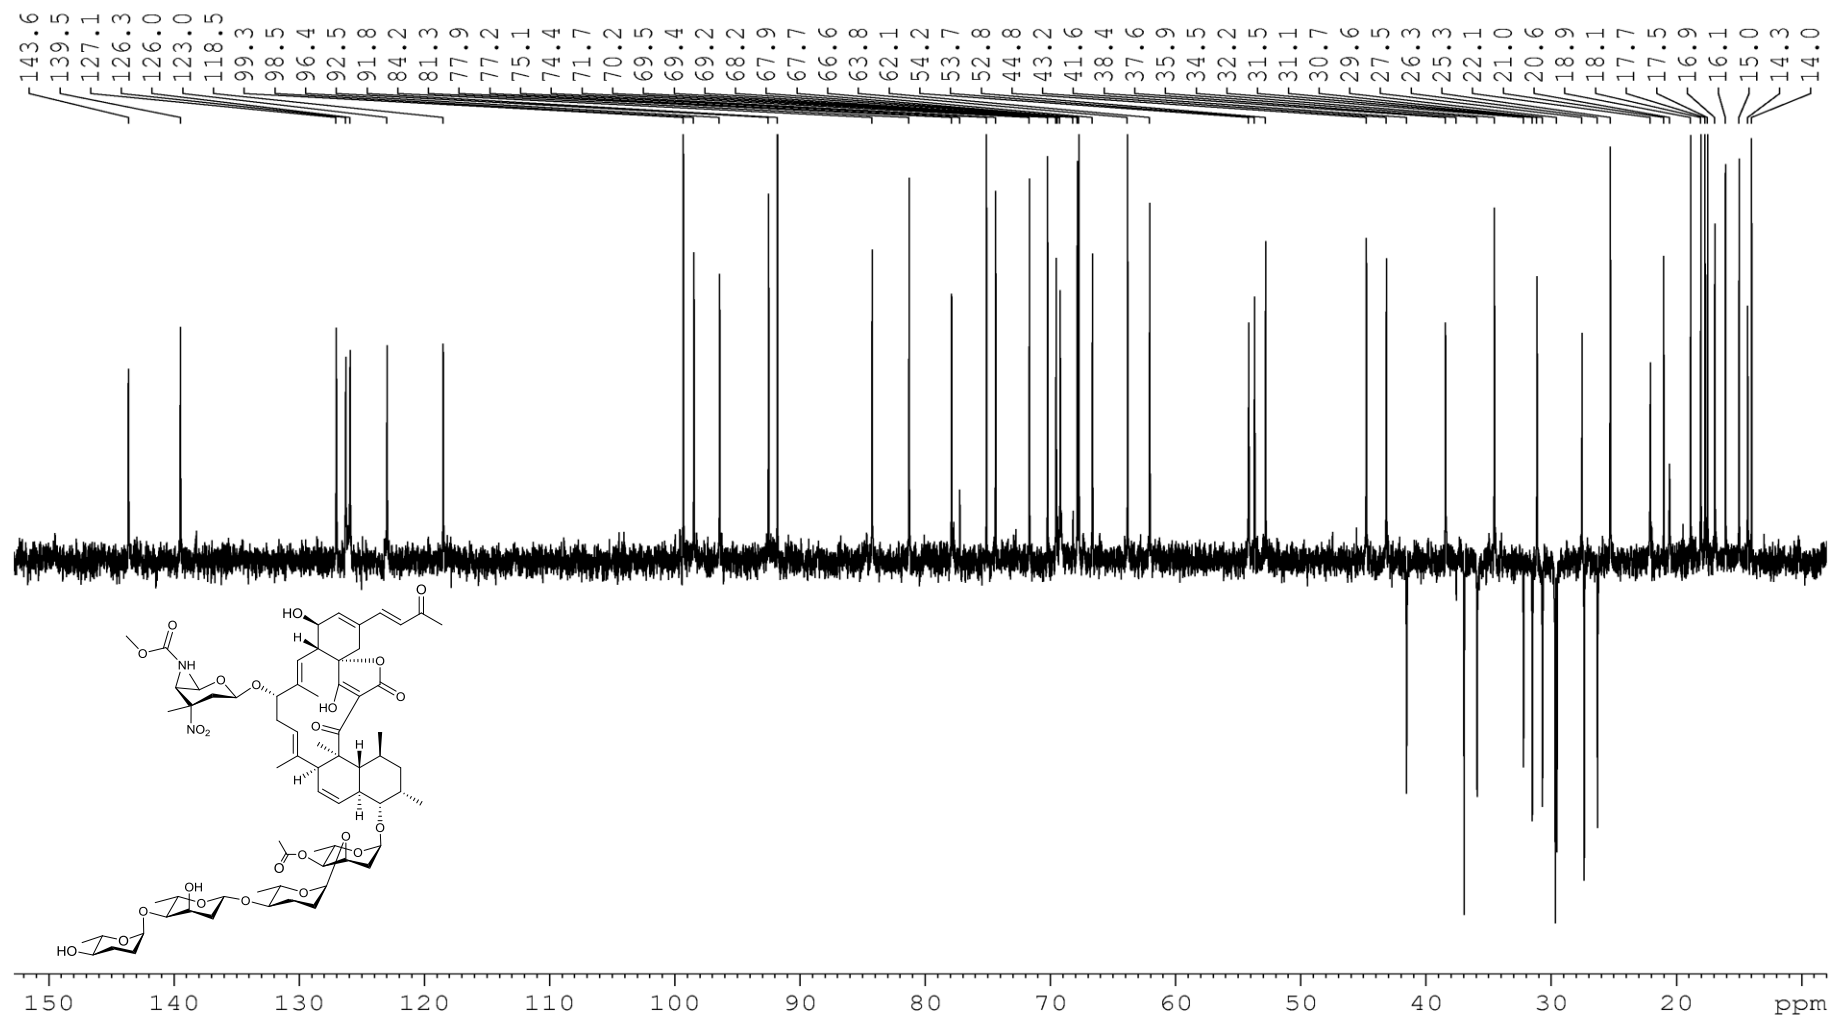

**Figure S19.**  $^1\text{H}$ - $^1\text{H}$  COSY spectrum of compound **3** in  $\text{CDCl}_3$ .

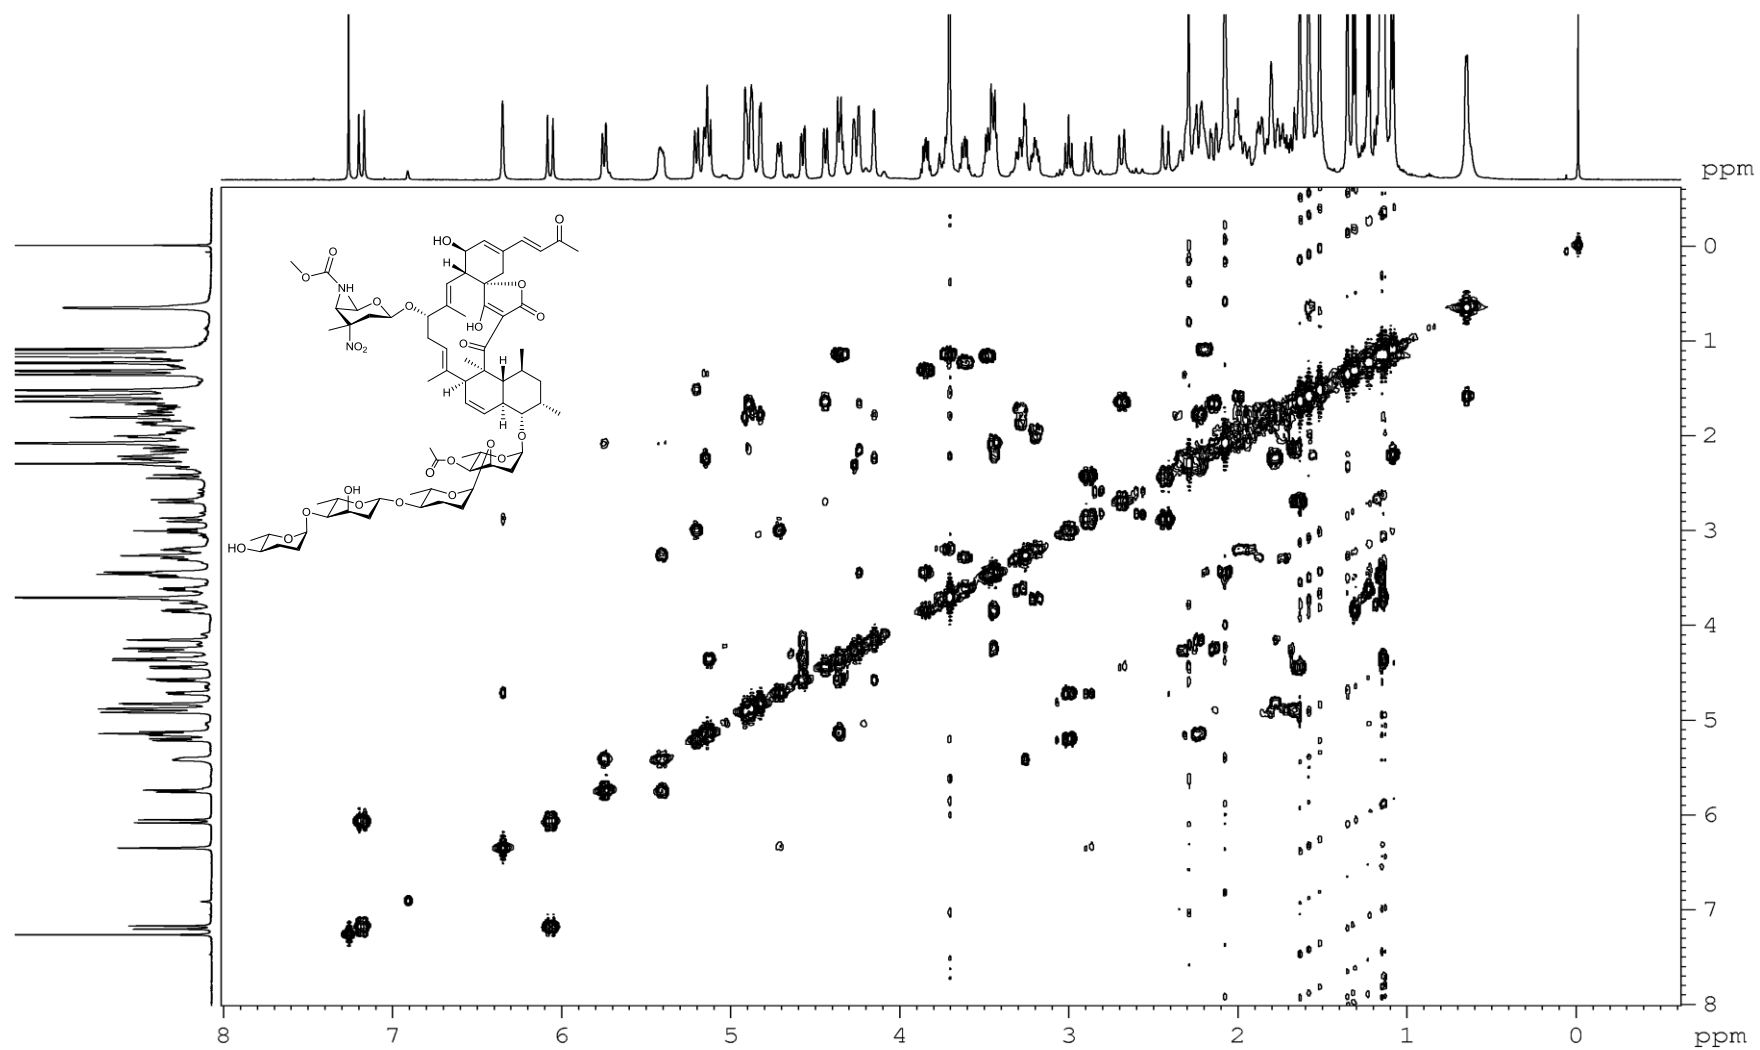

**Figure S20.** HSQC spectrum of compound **3** in CDCl<sub>3</sub>.

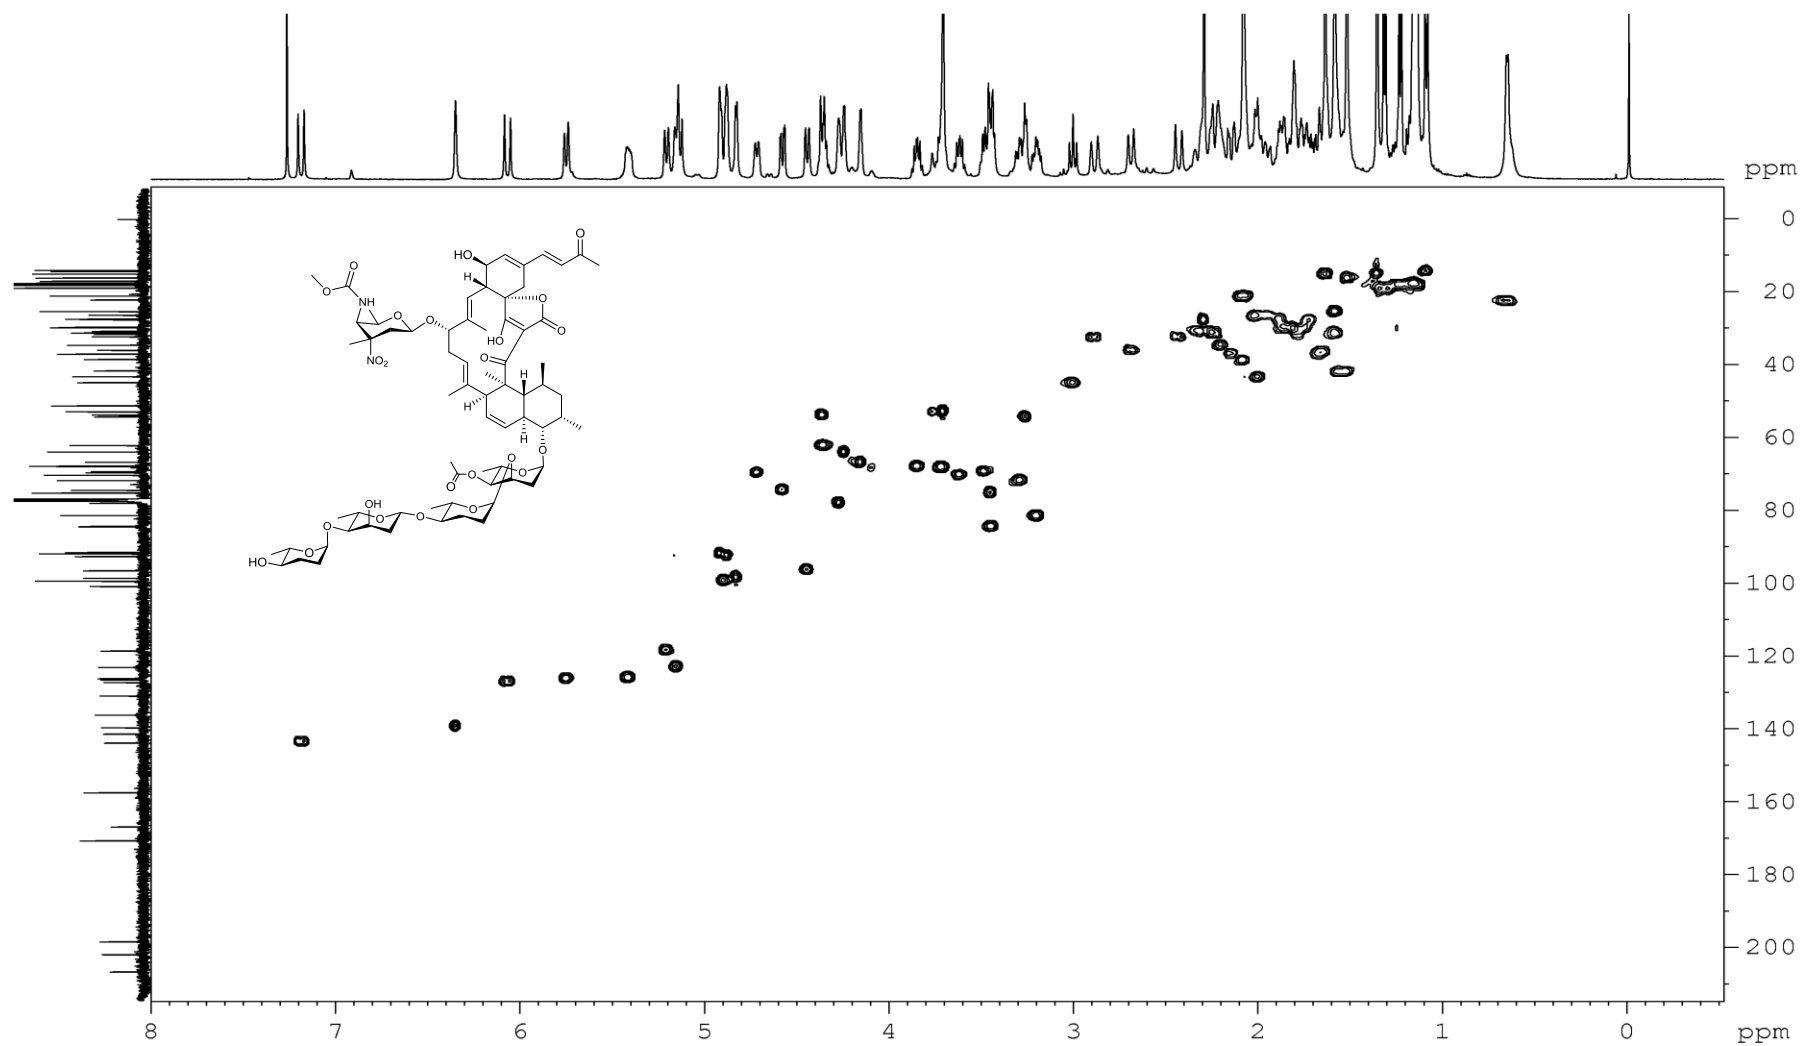

**Figure S21.** HMBC spectrum of compound **3** in CDCl<sub>3</sub>.

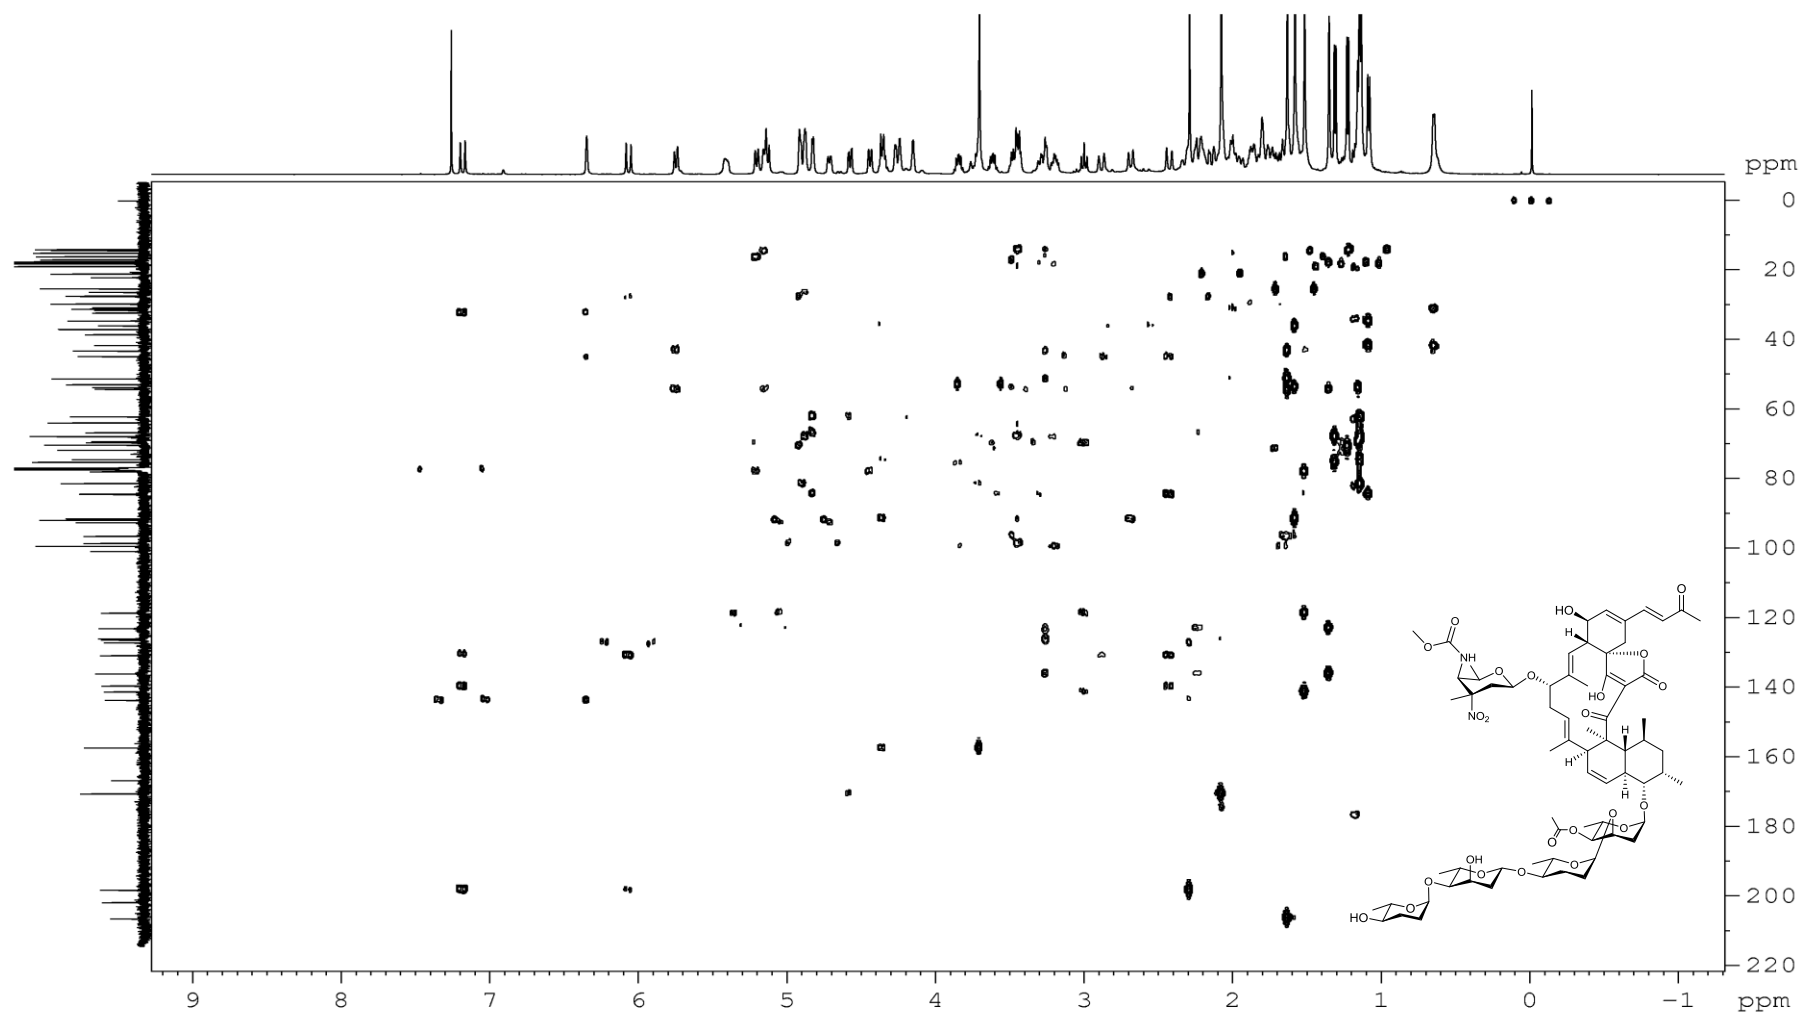

**Figure S22.** NOESY spectrum of compound **3** in CDCl<sub>3</sub>.

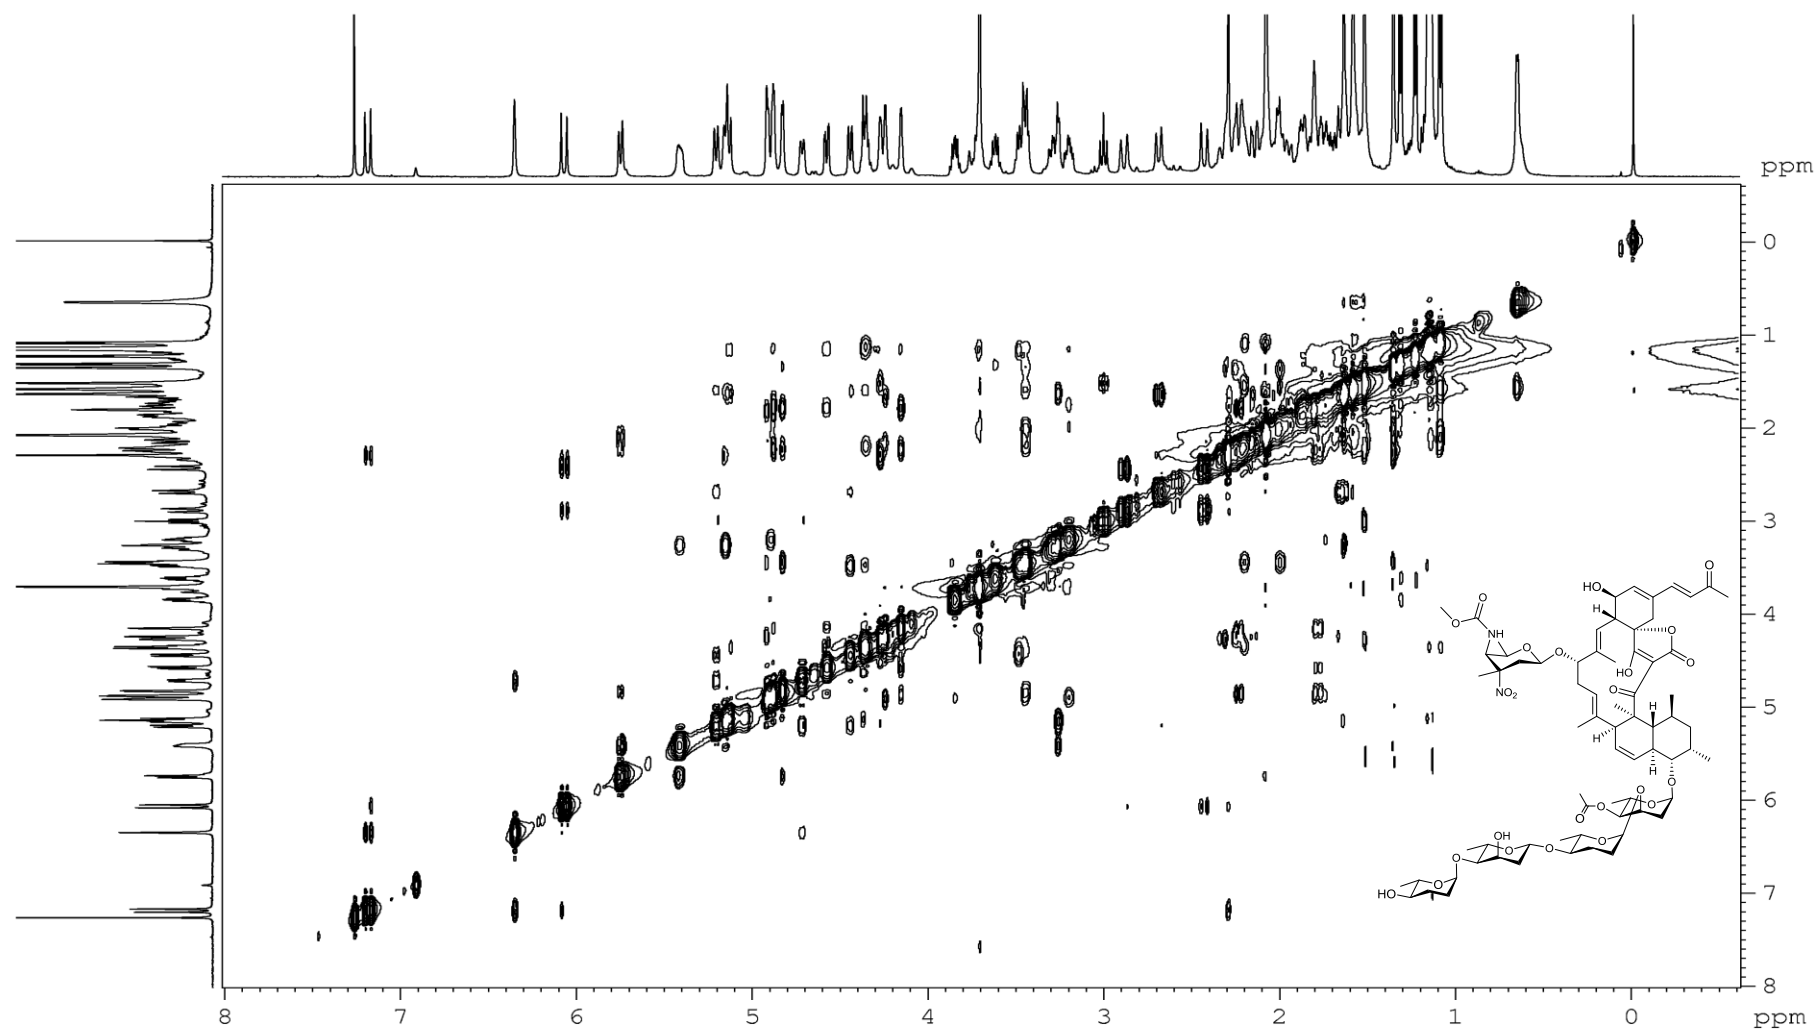

**Figure S23.**  $^1\text{H}$  NMR (500 MHz) spectrum of compound **4** in  $\text{CDCl}_3$ .

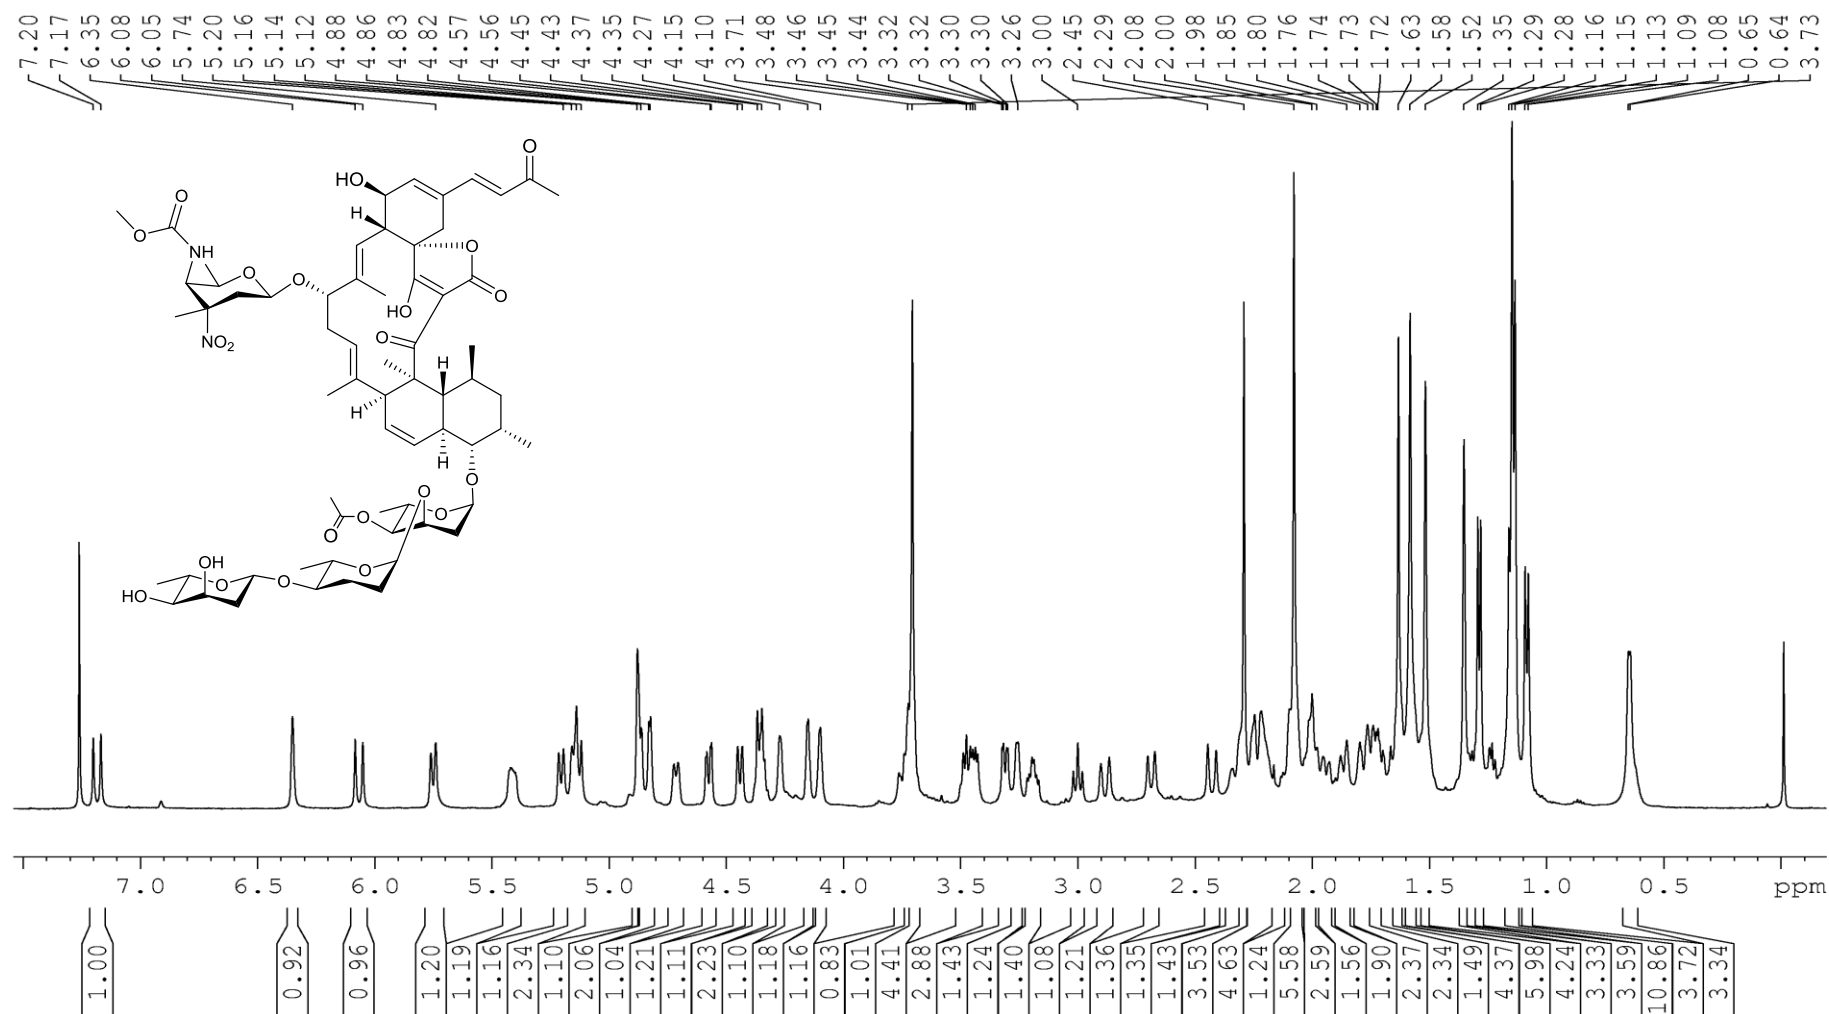



**Figure S24.**  $^{13}\text{C}$  NMR (125 MHz) spectrum of compound **4** in  $\text{CDCl}_3$ .

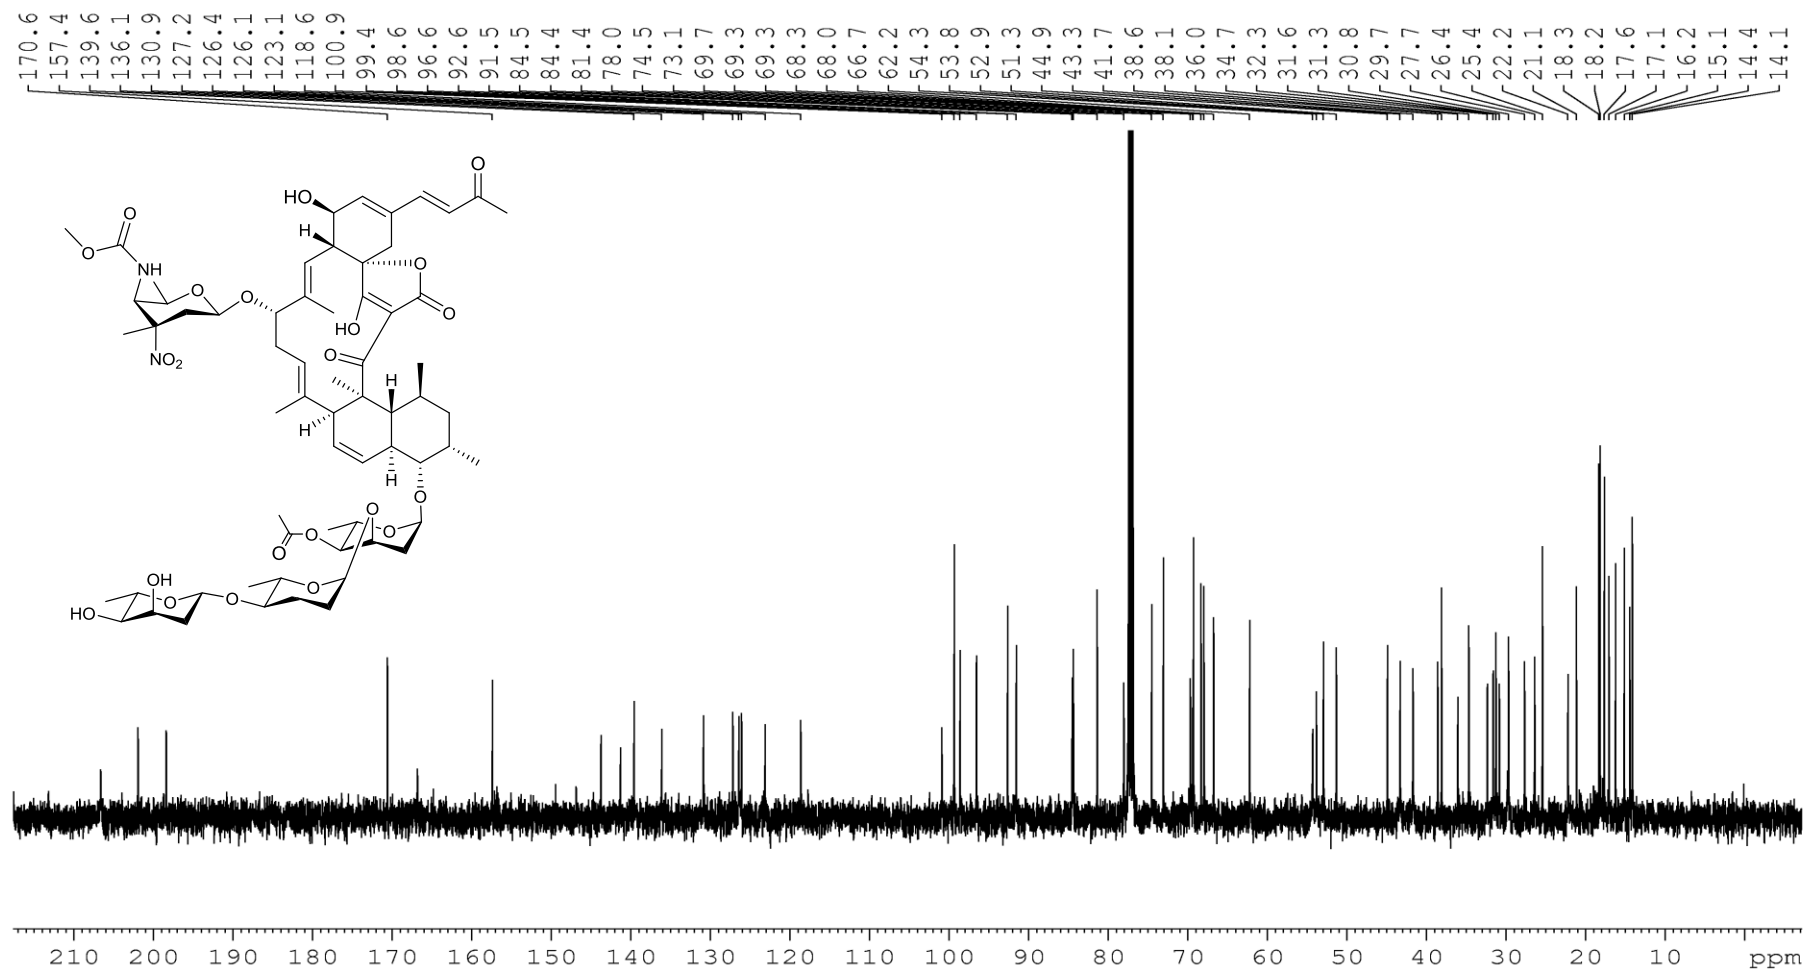

Chemical structure of compound 1 is shown in the top left corner. The structure is a complex polycyclic molecule with multiple sugar units and a nitro group. The  $^{13}\text{C}$  NMR spectrum is displayed below the structure, with peaks labeled with their chemical shifts in ppm. The peaks are:

- 143.6
- 139.5
- 127.1
- 126.3
- 126.0
- 123.0
- 118.5
- 99.2
- 98.5
- 96.4
- 92.5
- 84.3
- 81.3
- 77.9
- 77.2
- 74.4
- 72.9
- 69.5
- 69.2
- 69.2
- 68.2
- 67.9
- 66.6
- 62.1
- 54.2
- 53.7
- 52.8
- 44.8
- 43.2
- 41.6
- 38.4
- 38.0
- 35.9
- 34.5
- 32.2
- 31.5
- 31.1
- 30.7
- 29.6
- 27.5
- 26.3
- 25.3
- 22.1
- 21.0
- 18.2
- 18.1

**Figure S26.**  $^1\text{H}$ - $^1\text{H}$  COSY spectrum of compound **4** in  $\text{CDCl}_3$ .

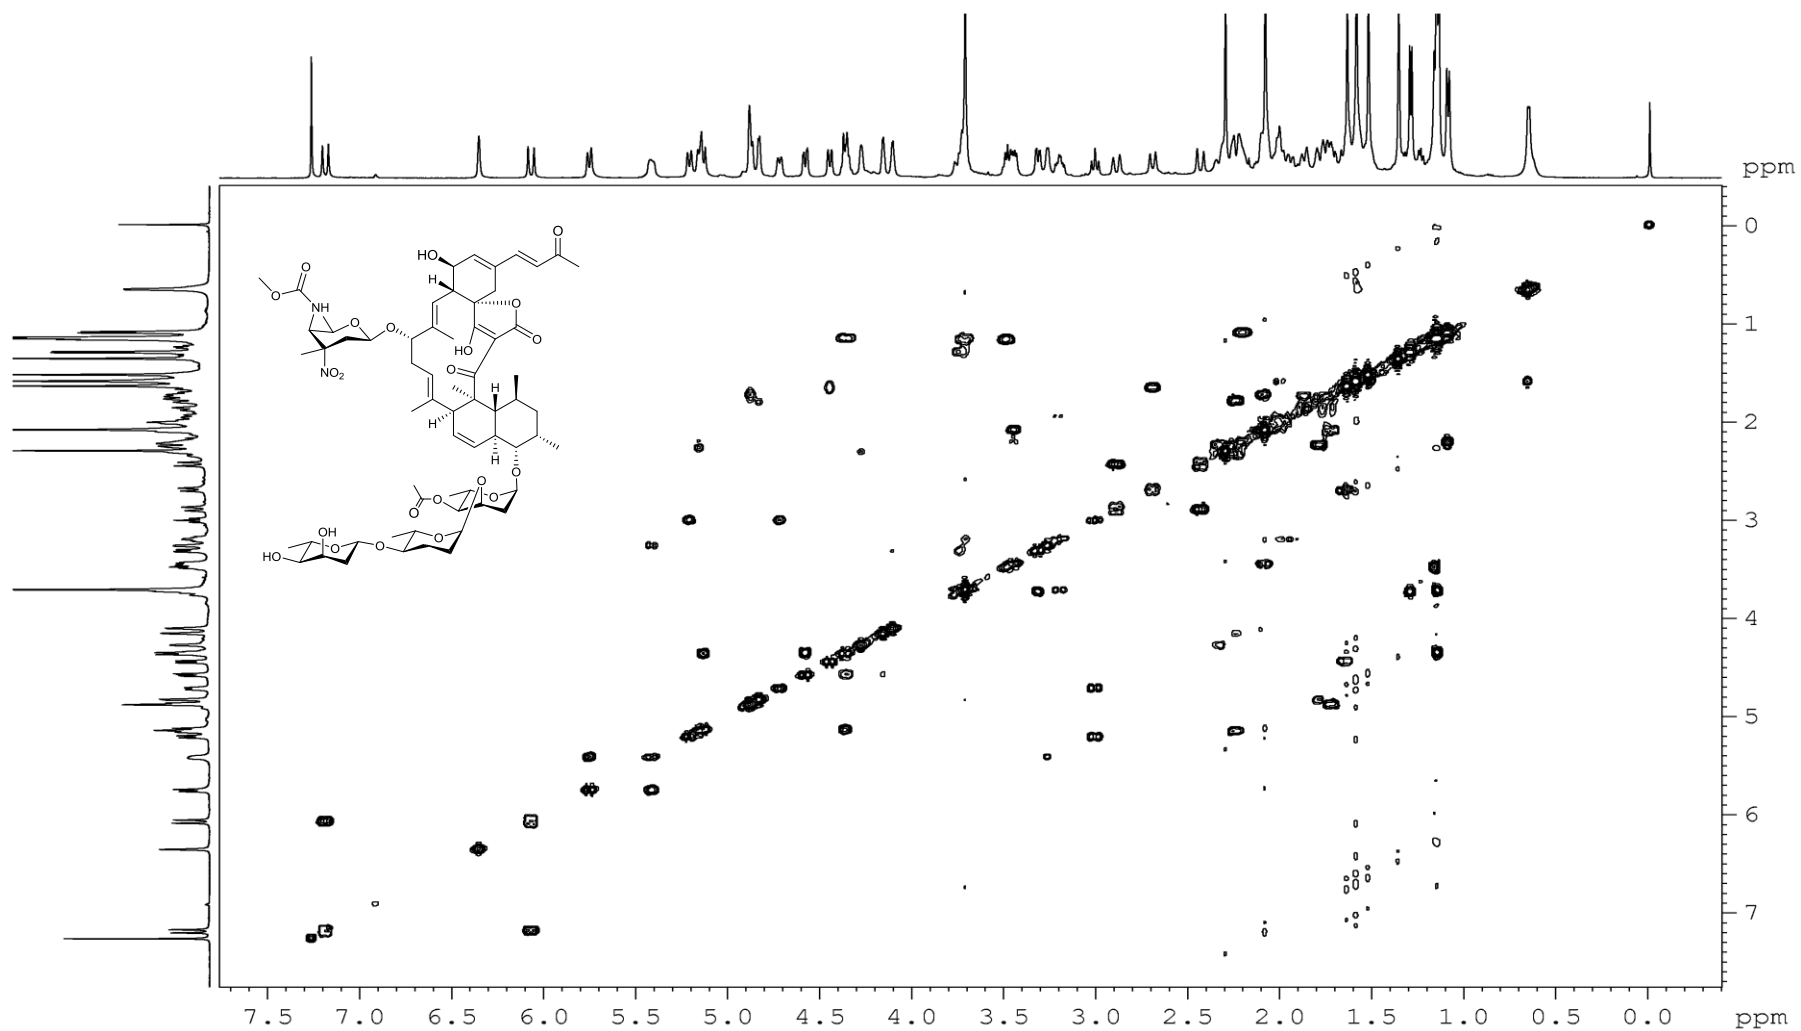

**Figure S27.** HSQC spectrum of compound **4** in CDCl<sub>3</sub>.

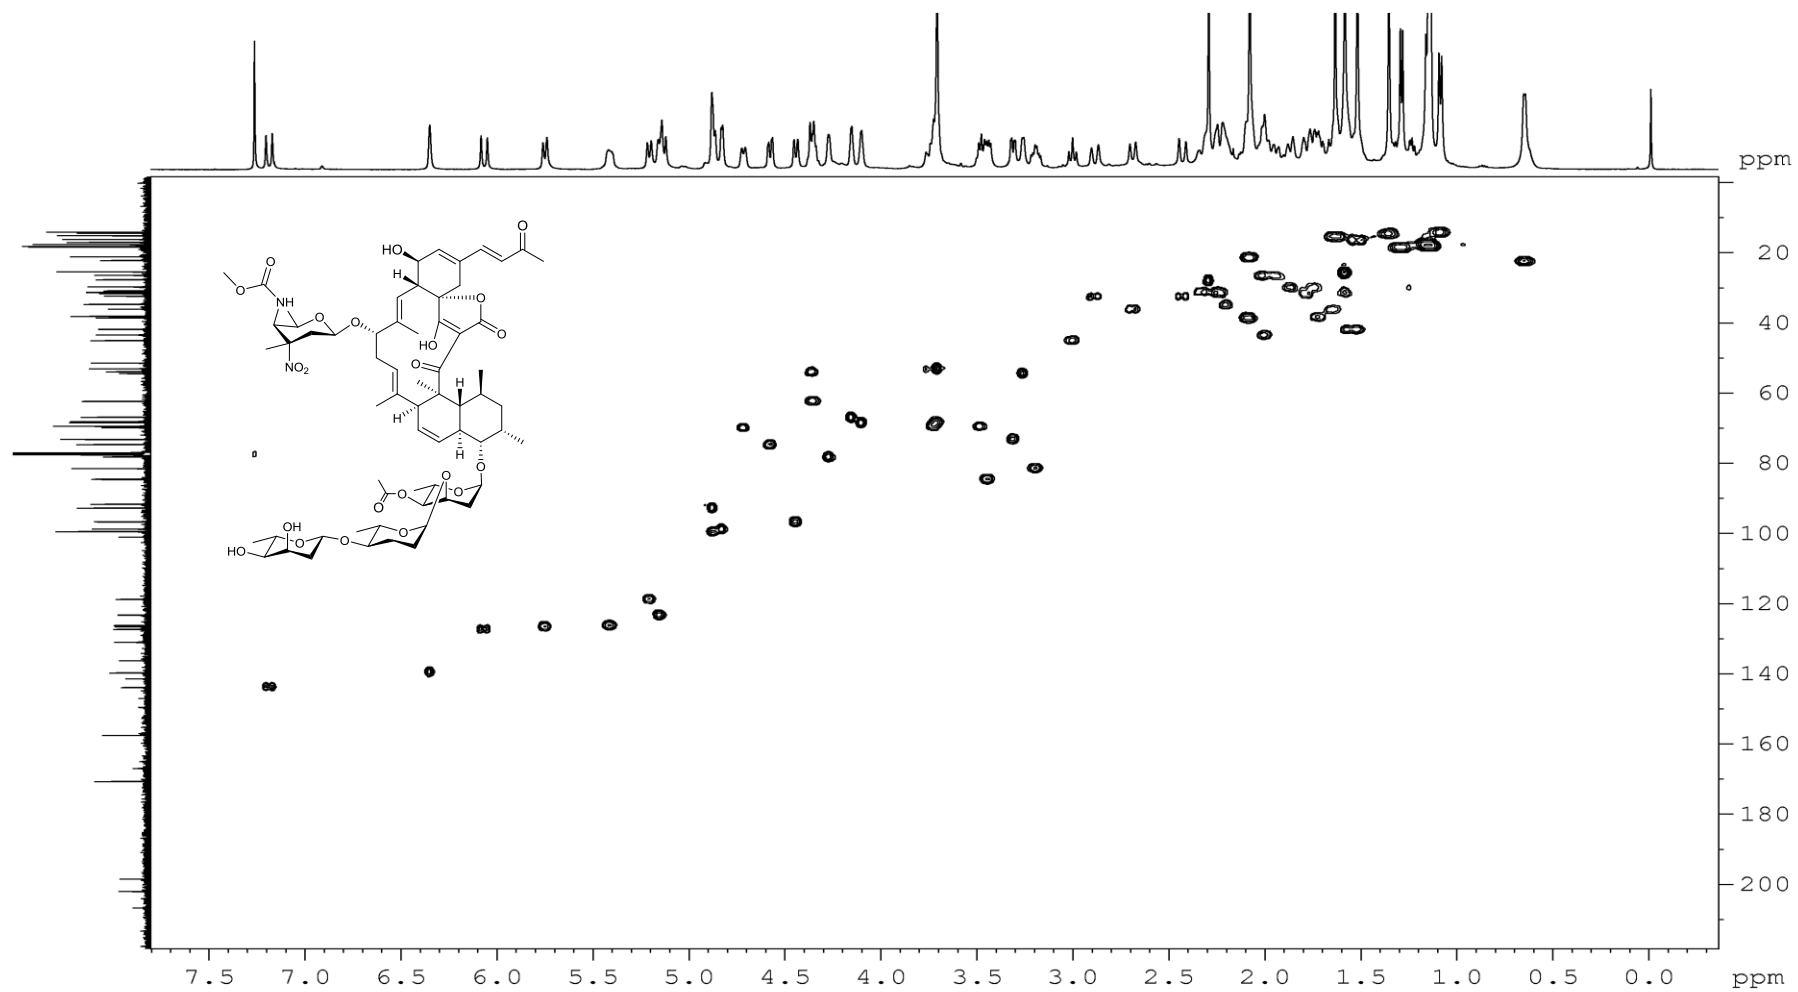

**Figure S28.** HMBC spectrum of compound **4** in CDCl<sub>3</sub>.

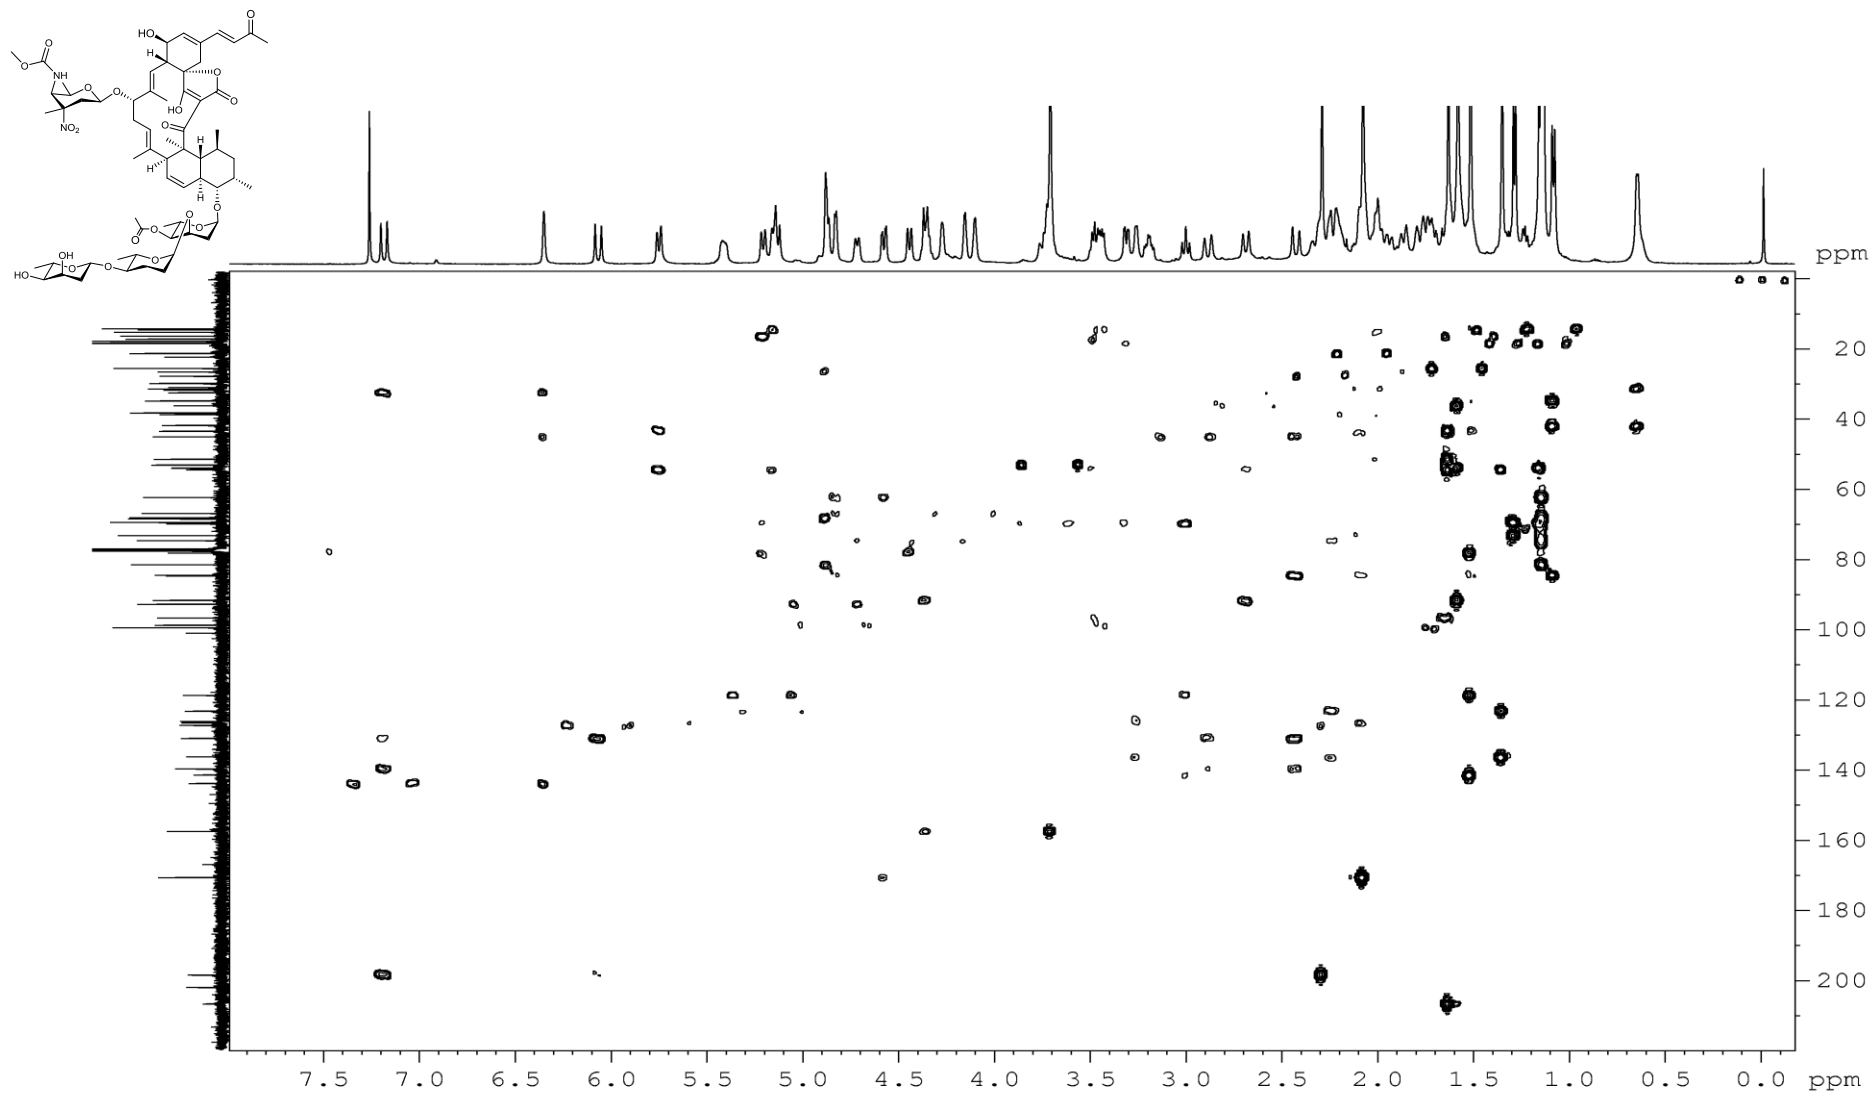

**Figure S29.** NOESY spectrum of compound **4** in CDCl<sub>3</sub>.

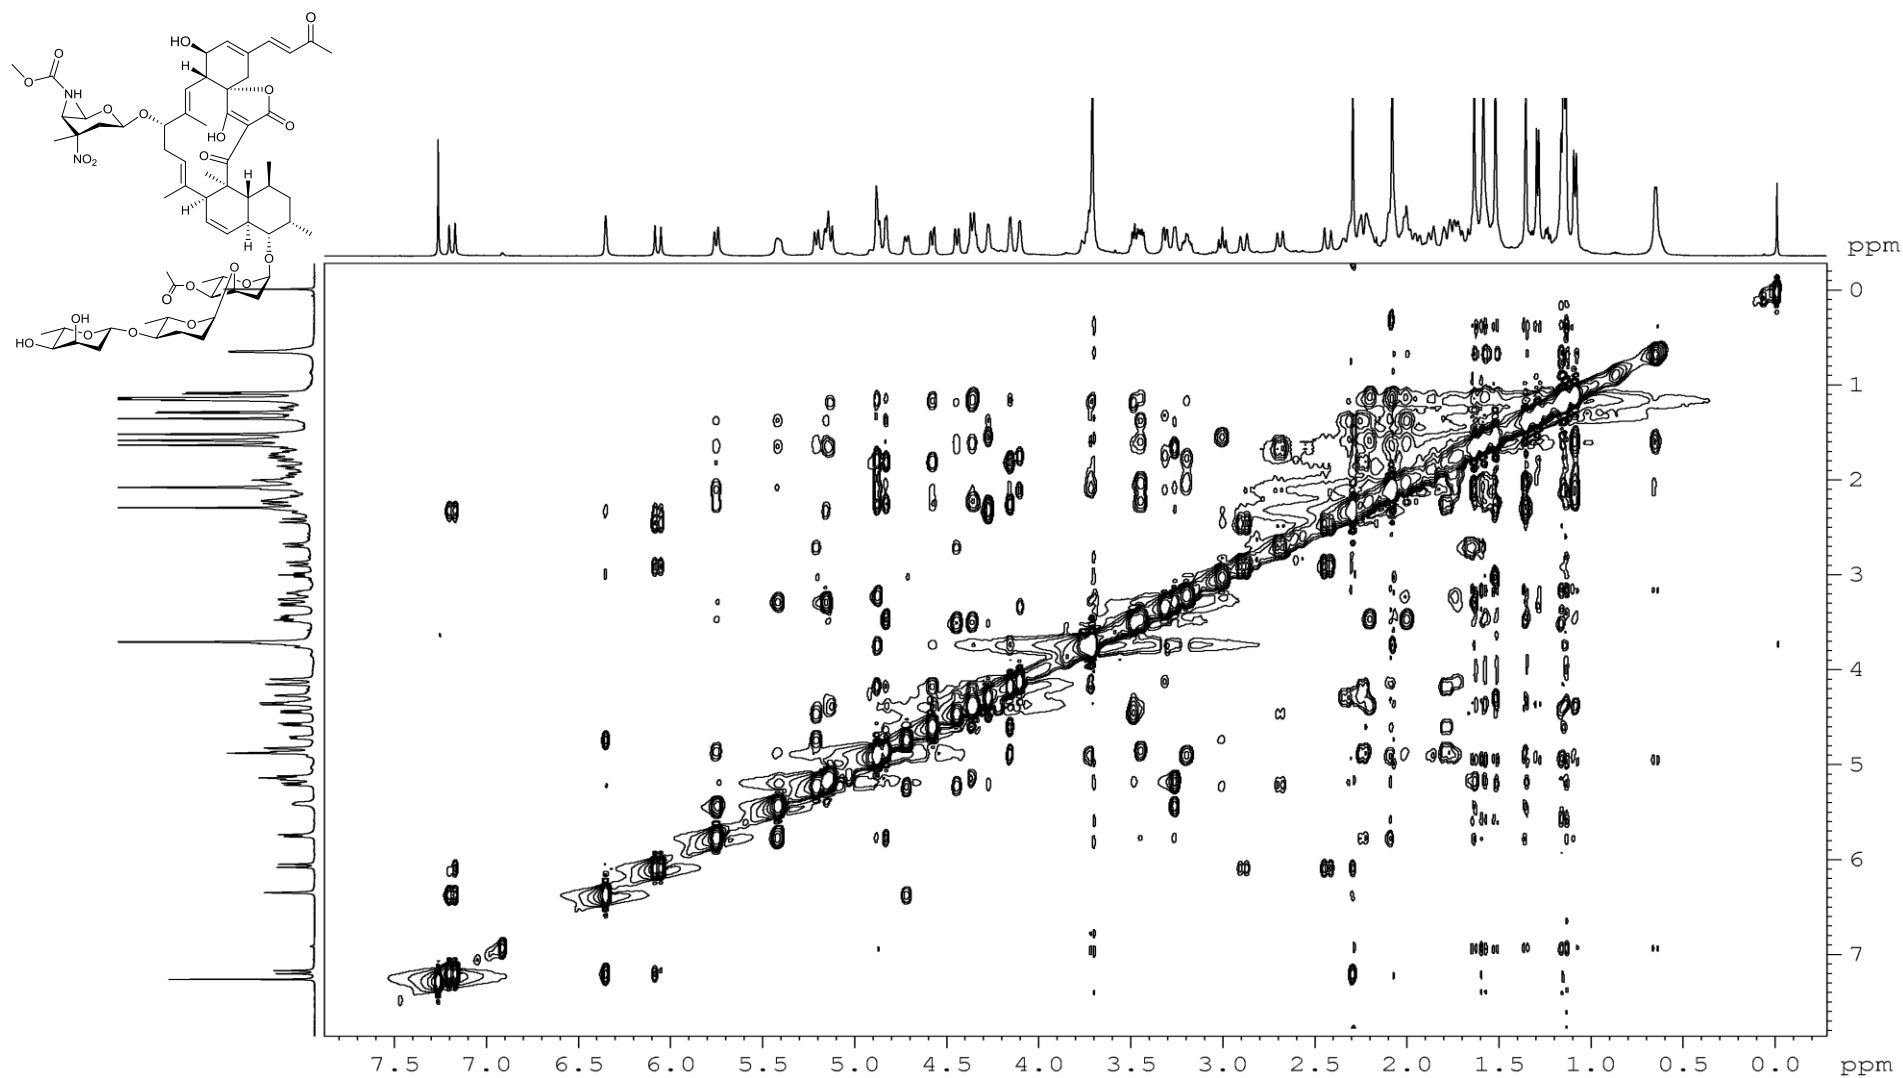

**Figure S30.**  $^1\text{H}$  NMR (500 MHz) spectrum of compound **5** in  $\text{CDCl}_3$ .

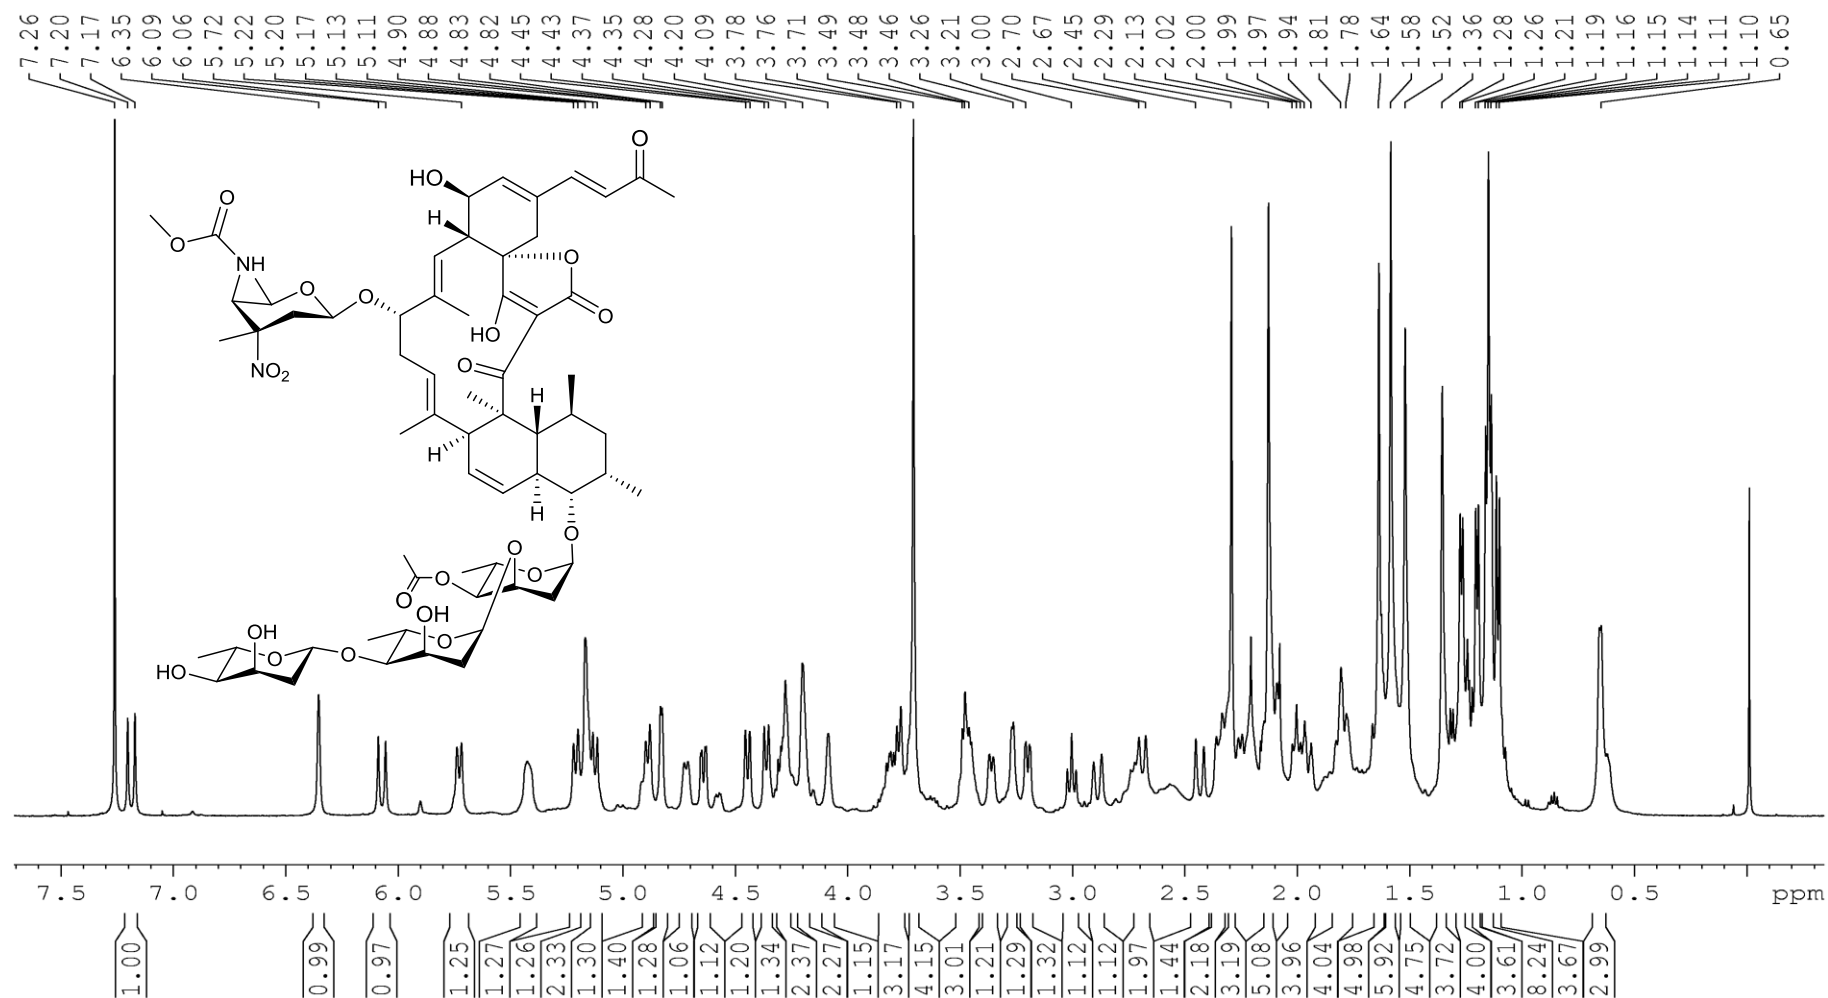

**Figure S31.**  $^{13}\text{C}$  NMR (125 MHz) spectrum of compound **5** in  $\text{CDCl}_3$ .

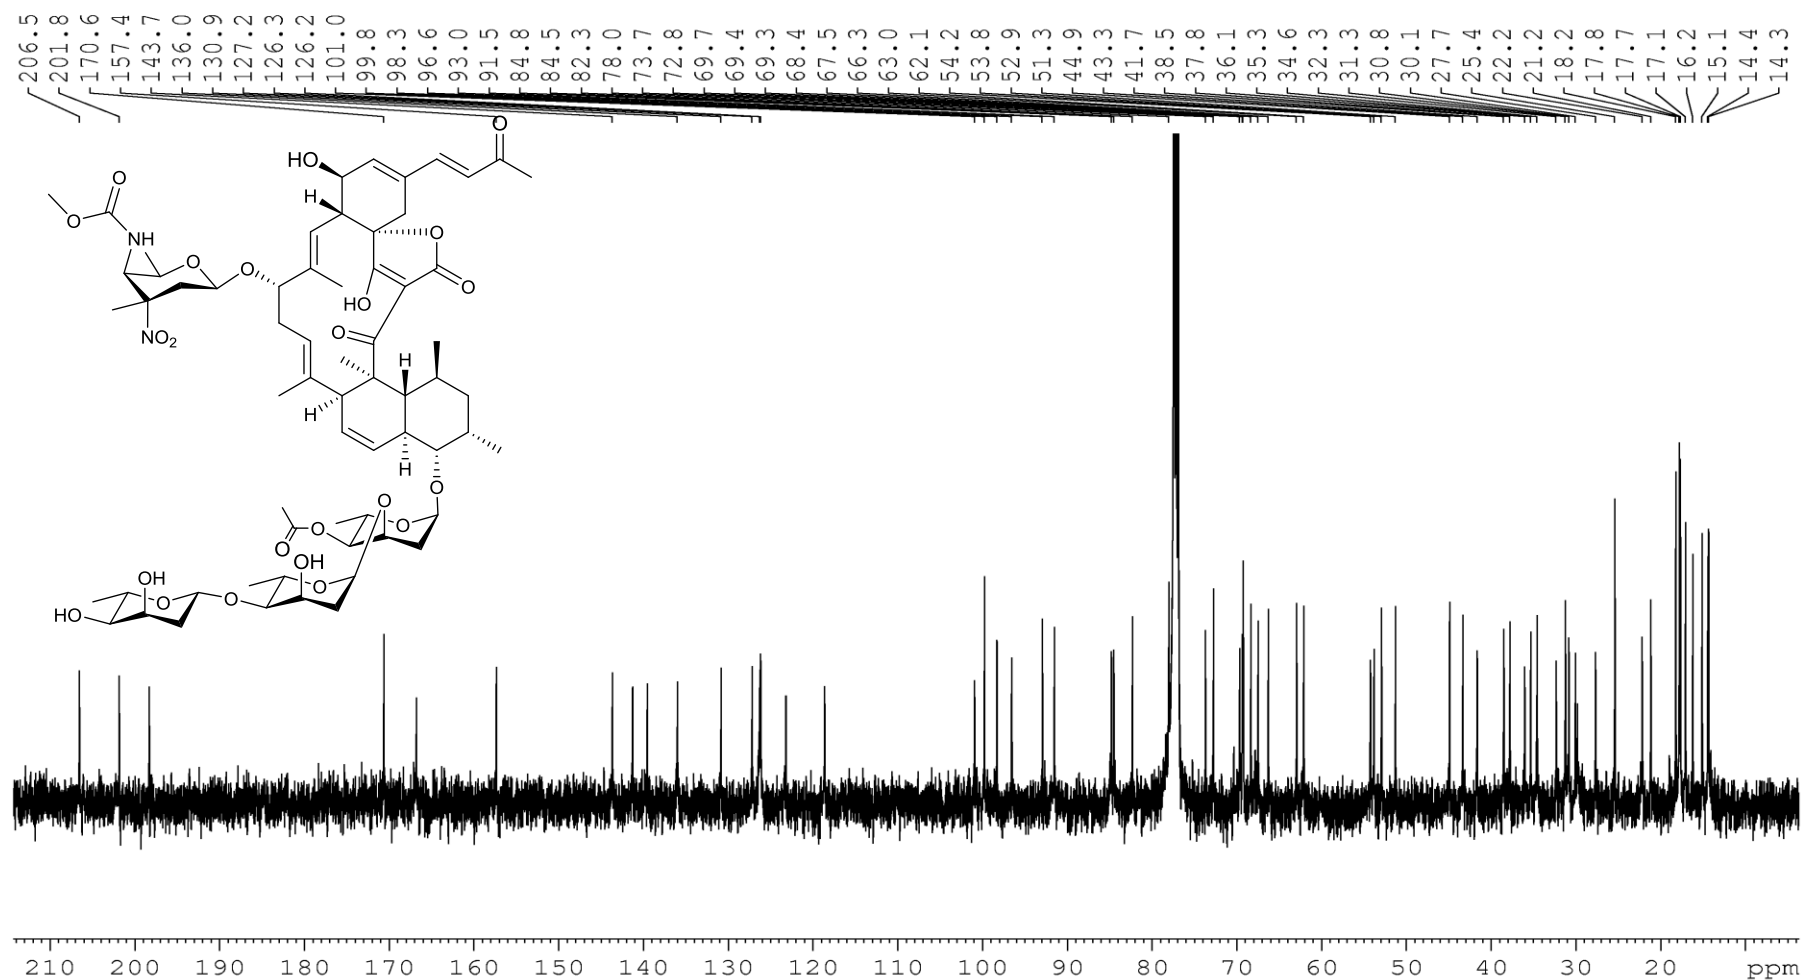



**Figure S32.**  $^{13}\text{C}$  DEPT spectrum of compound **5** in  $\text{CDCl}_3$ .

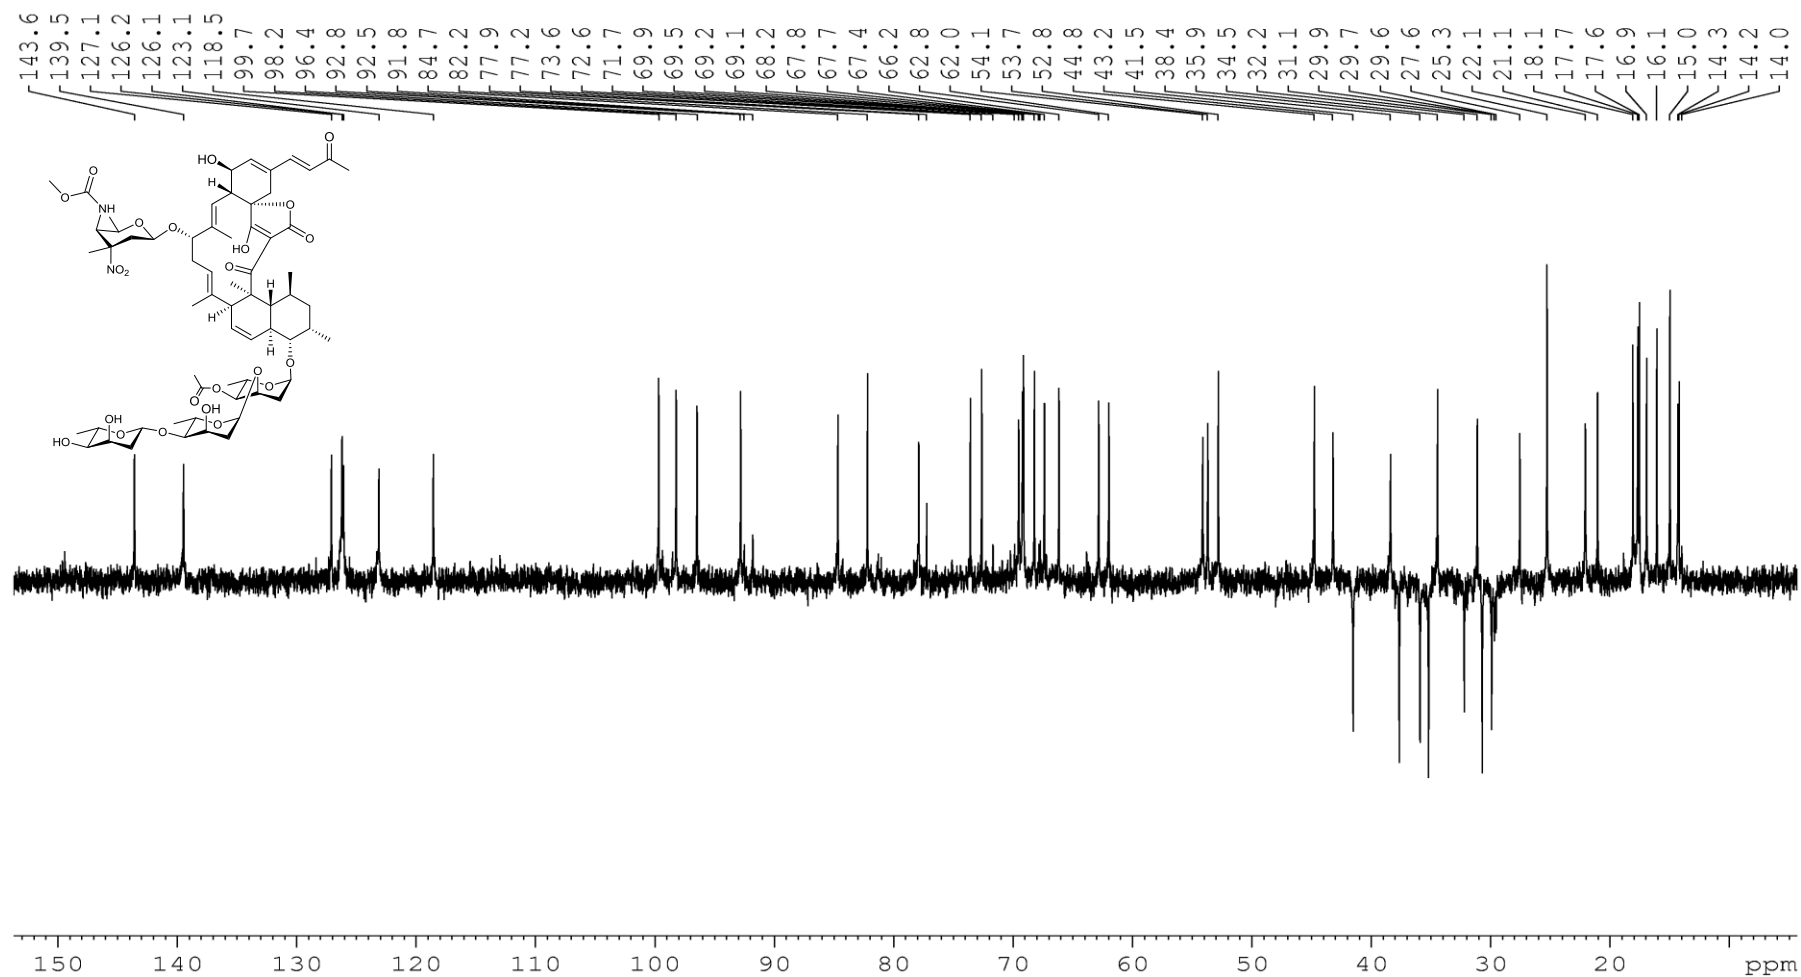

**Figure S33.**  $^1\text{H}$ - $^1\text{H}$  COSY spectrum of compound **5** in  $\text{CDCl}_3$ .

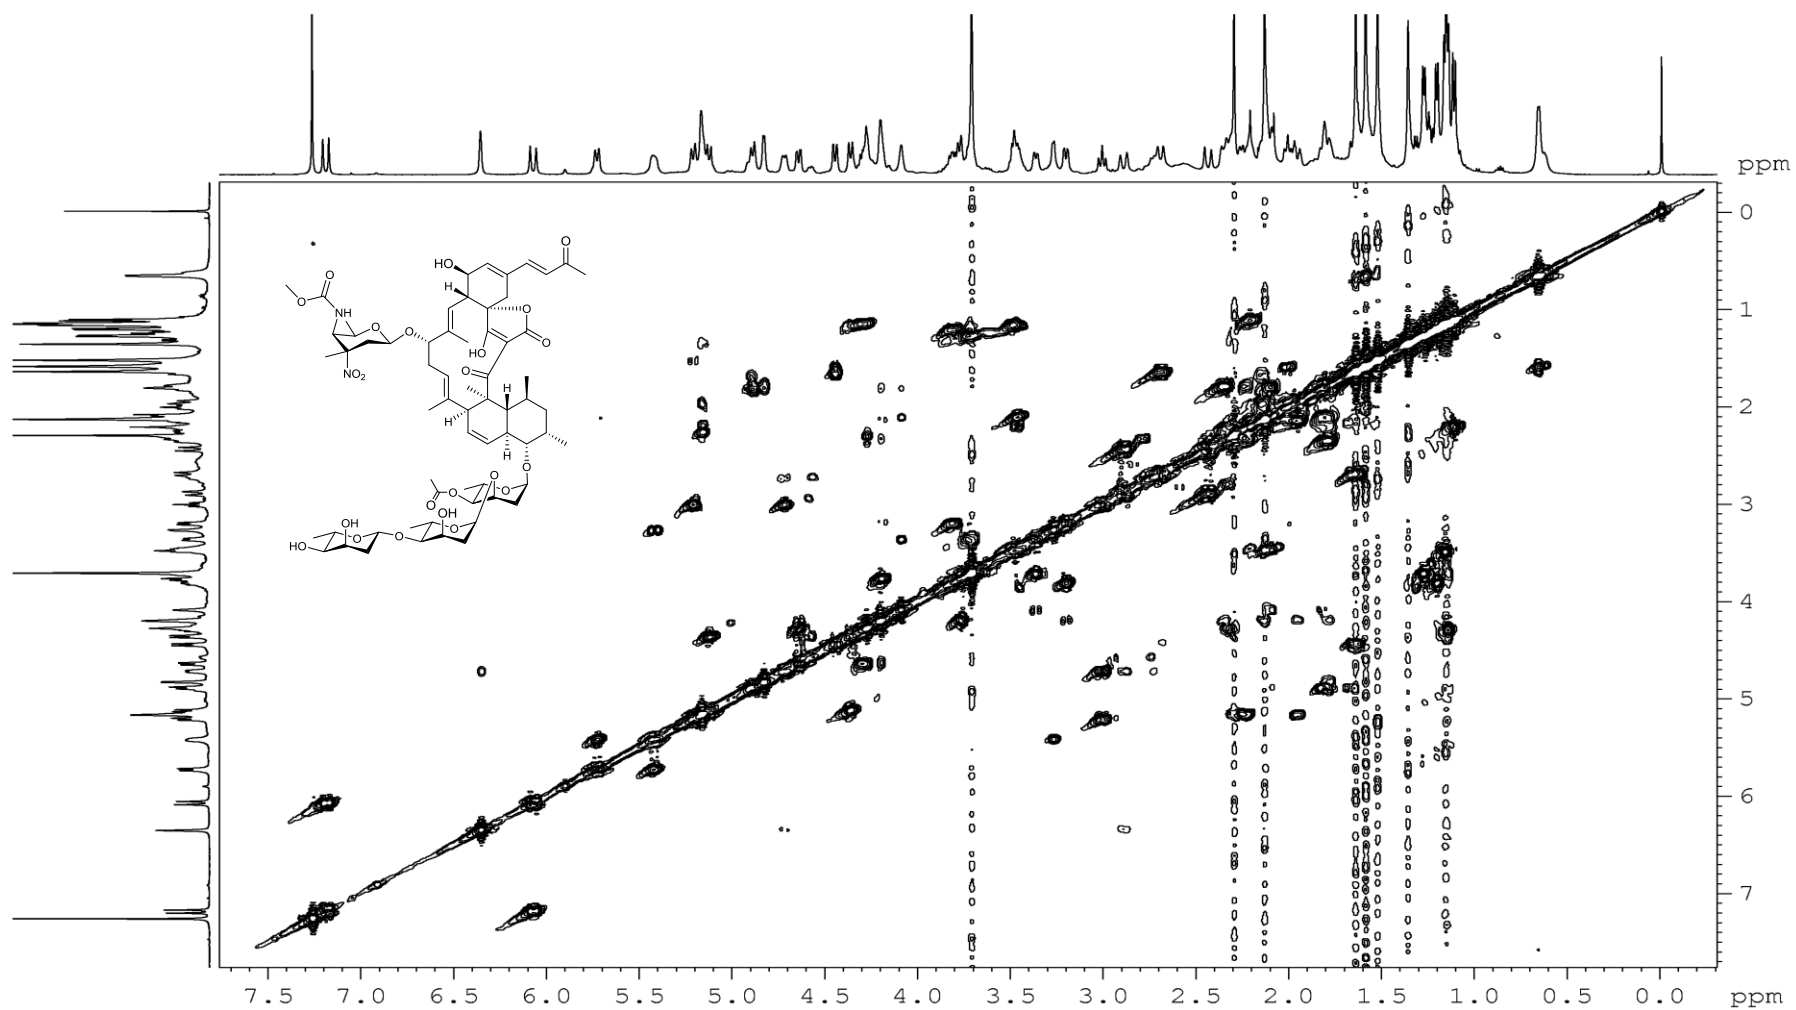

**Figure S34.** HSQC spectrum of compound **5** in CDCl<sub>3</sub>.

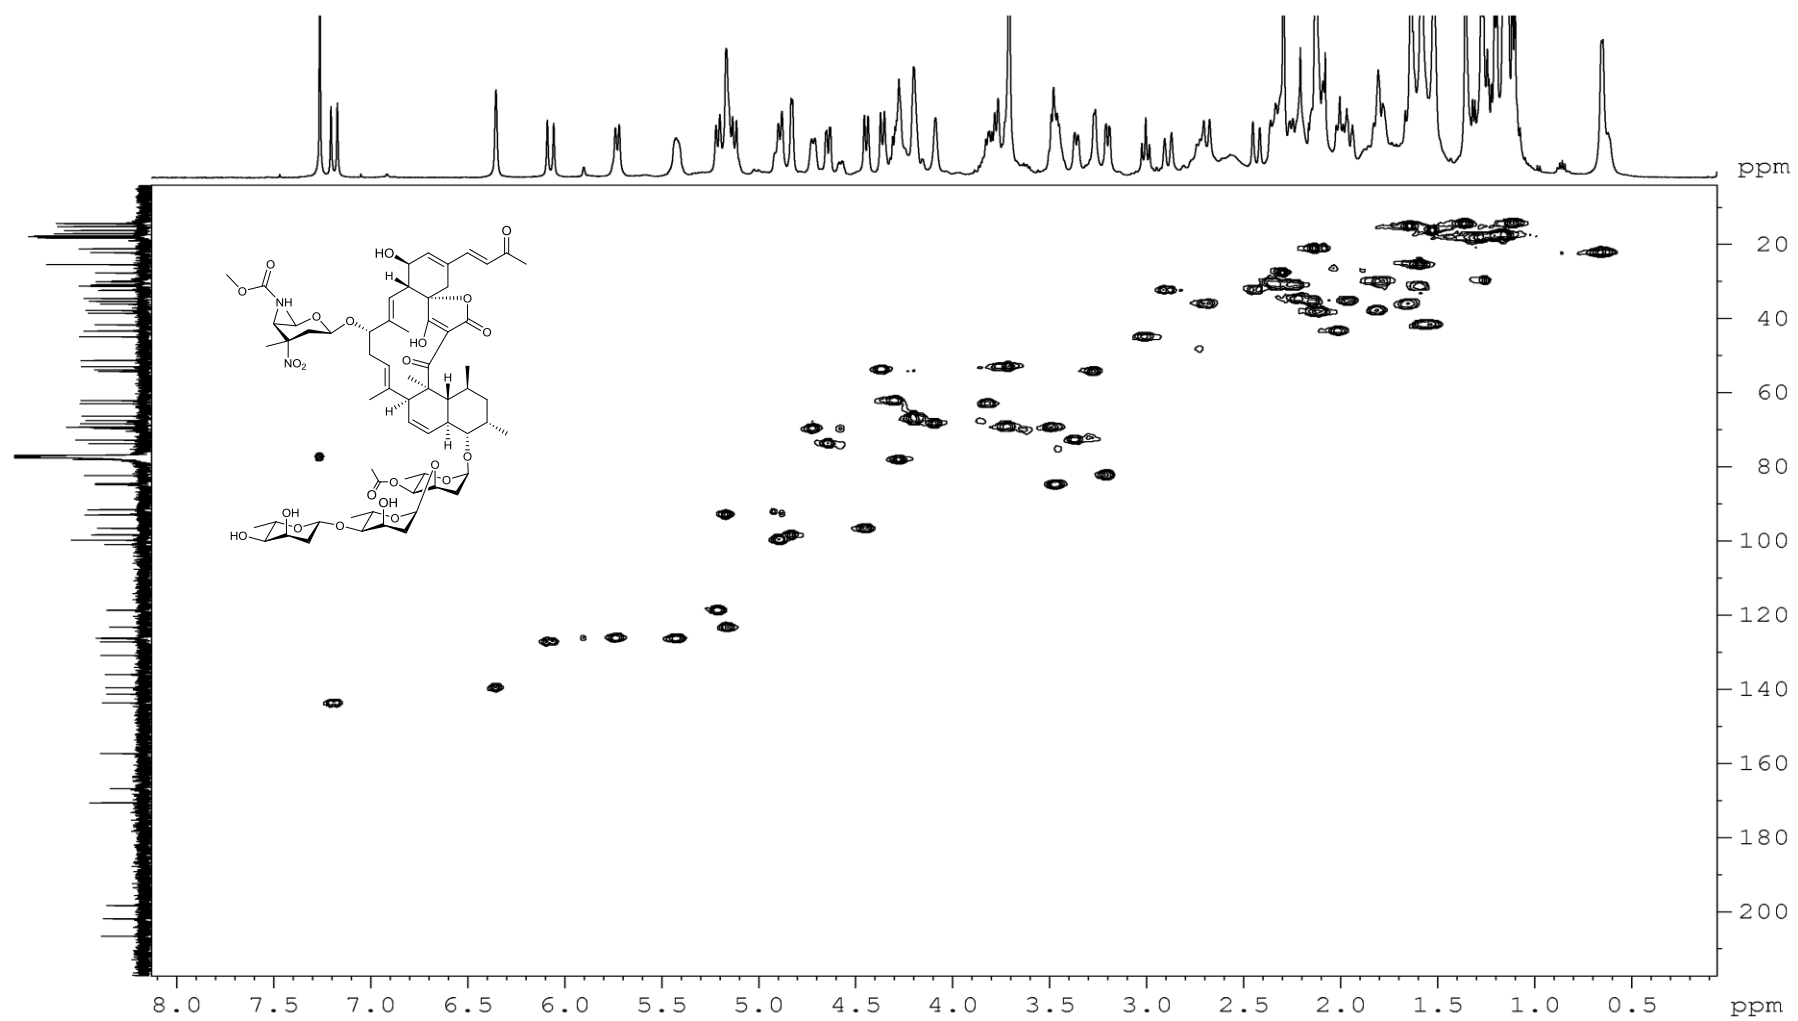

**Figure S35.** HMBC spectrum of compound **5** in CDCl<sub>3</sub>.

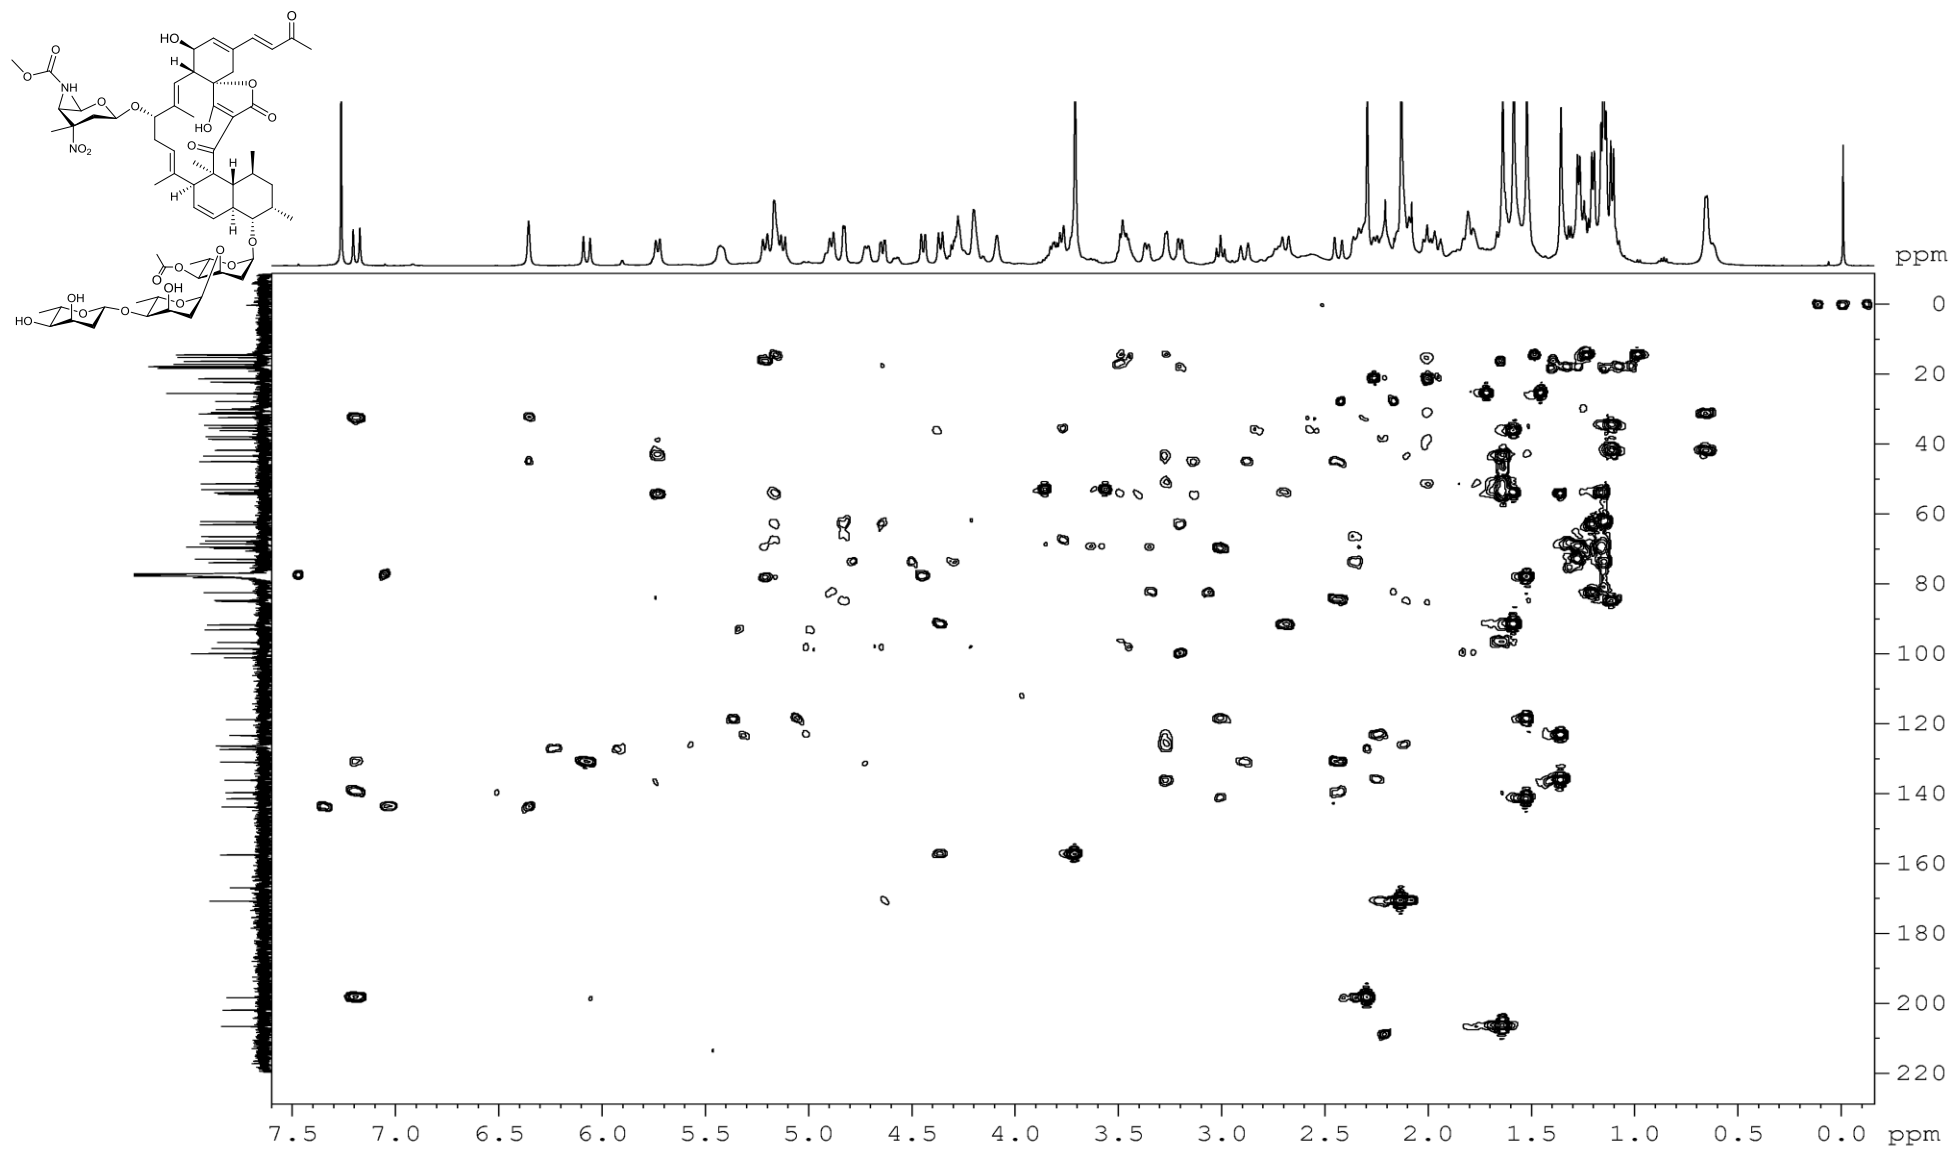

**Figure S36.** NOESY spectrum of compound **5** in CDCl<sub>3</sub>.

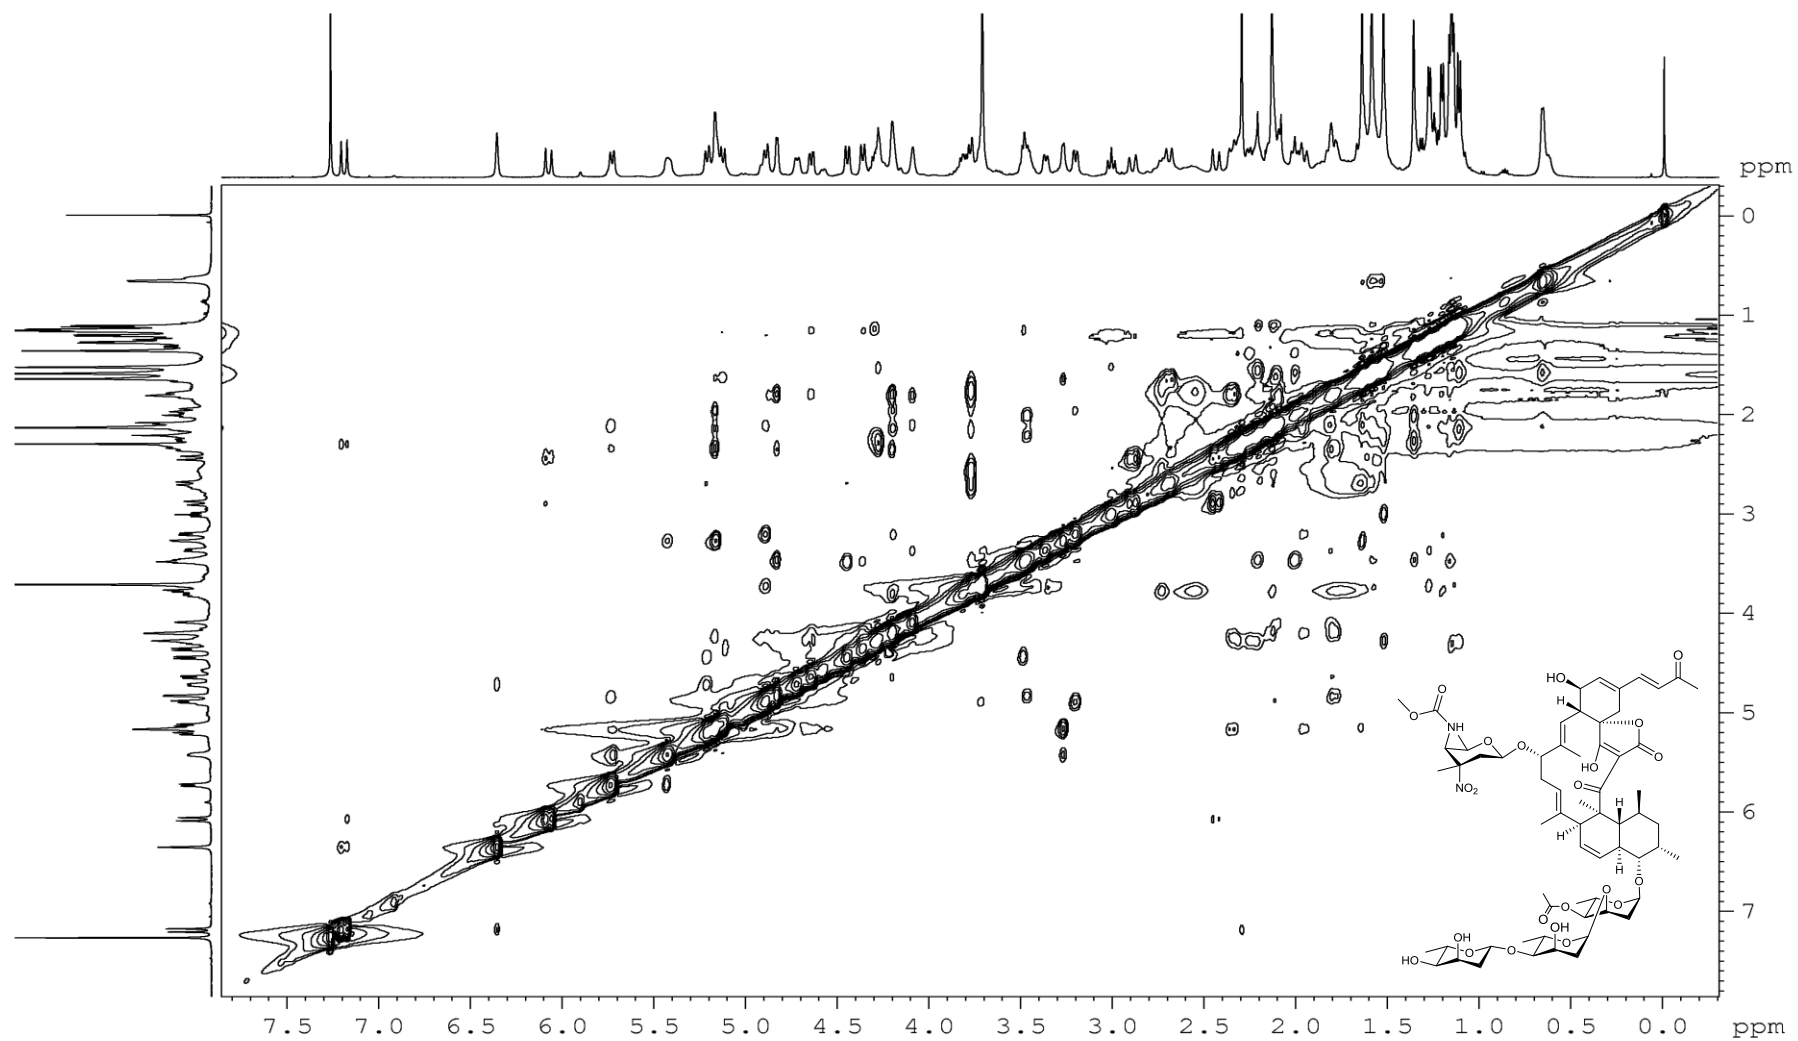

**Figure S37.**  $^1\text{H}$  NMR (500 MHz) spectrum of compound **6** in  $\text{CD}_3\text{OD}$ .

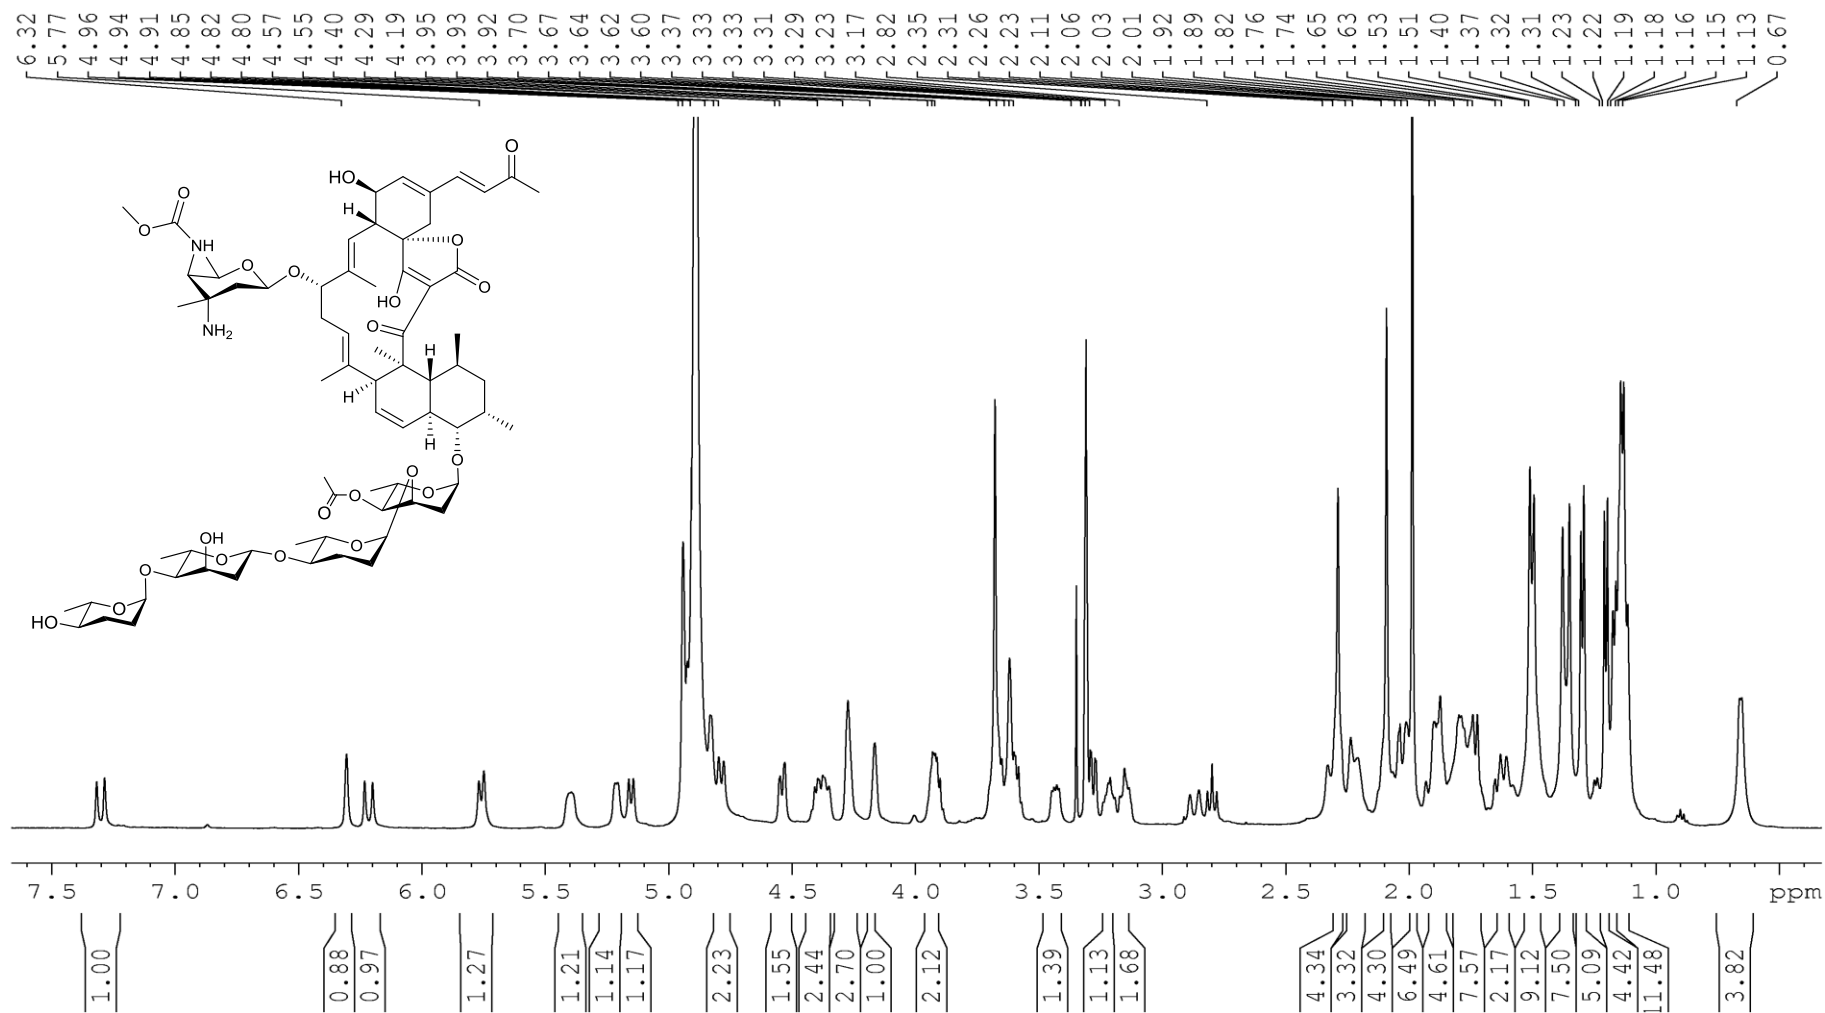

**Figure S38.**  $^{13}\text{C}$  NMR (125 MHz) spectrum of compound **6** in  $\text{CD}_3\text{OD}$ .

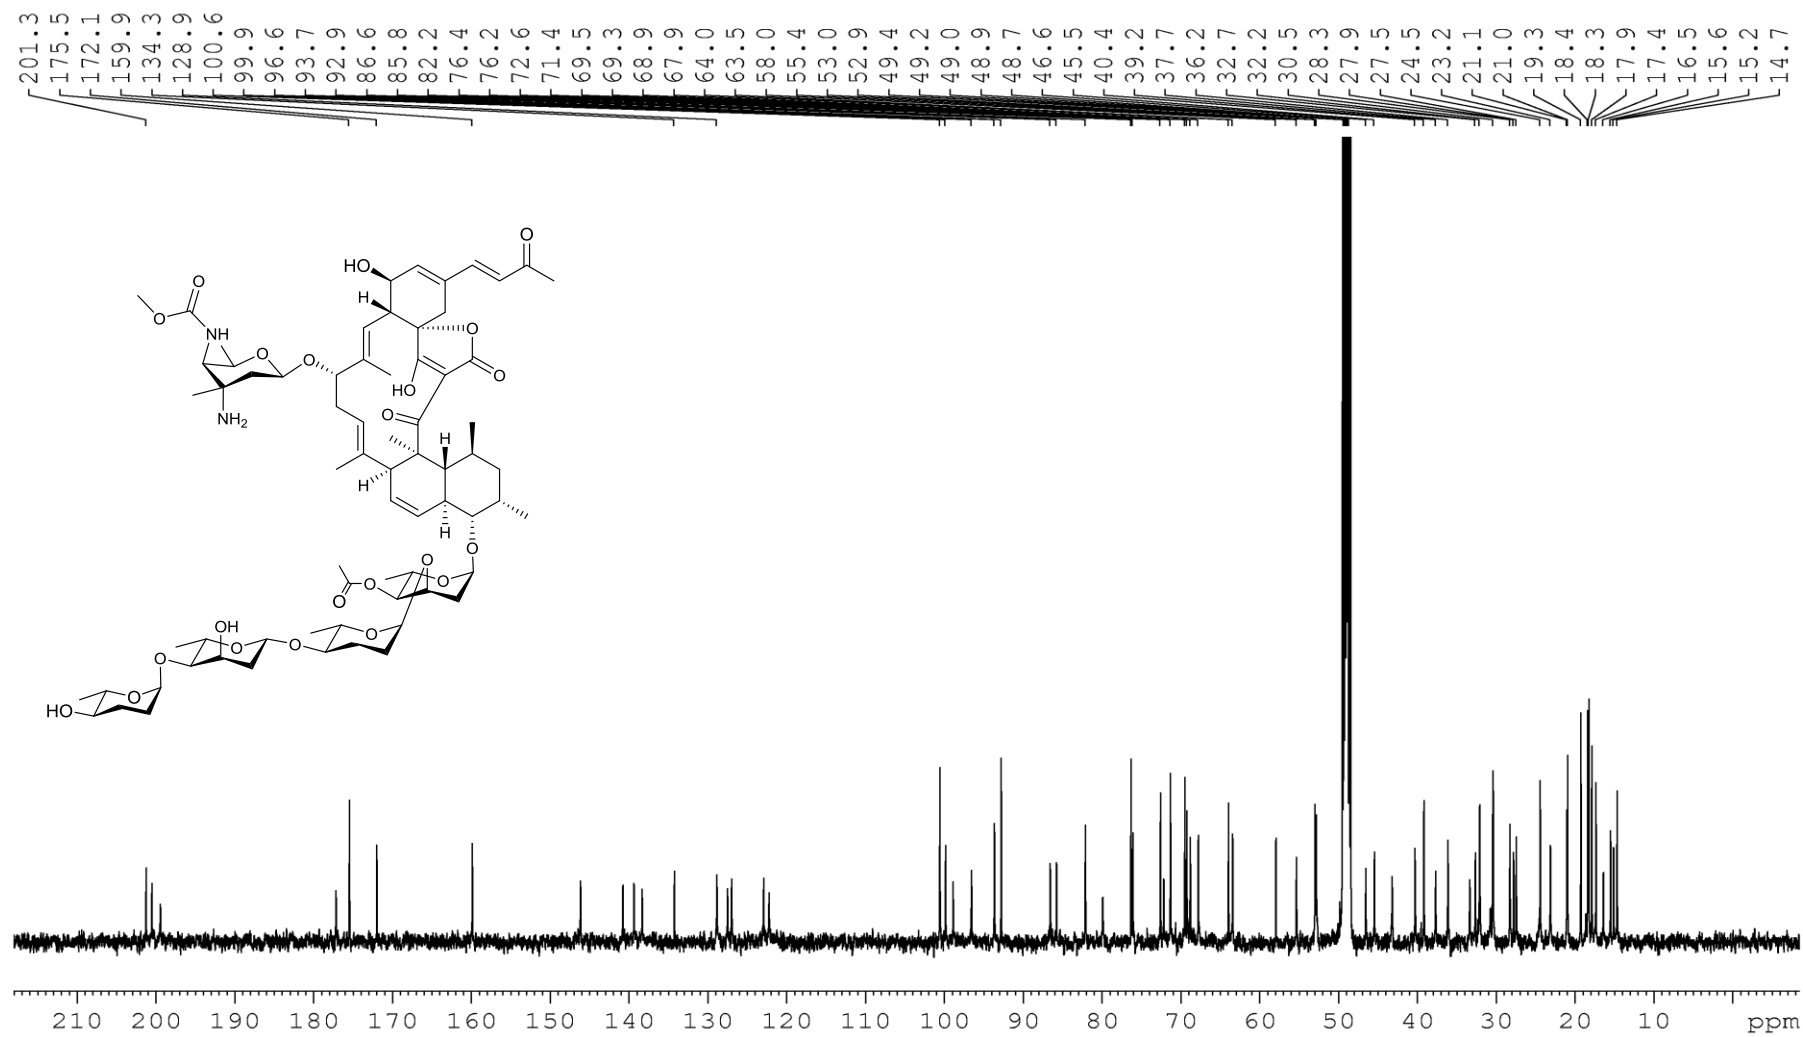

The figure displays the chemical structure of compound 1 and its corresponding <sup>13</sup>C NMR spectrum. The chemical structure is a complex polycyclic molecule with multiple stereocenters and functional groups, including a carboxamide, a ketone, and several hydroxyl groups. The <sup>13</sup>C NMR spectrum shows a range of peaks from approximately 15 to 155 ppm. The peak assignments are as follows:

| Chemical Shift (ppm) |
|----------------------|
| 144.8                |
| 139.4                |
| 127.5                |
| 126.2                |
| 125.6                |
| 121.6                |
| 120.9                |
| 99.2                 |
| 98.5                 |
| 95.2                 |
| 92.3                 |
| 91.4                 |
| 85.2                 |
| 80.8                 |
| 78.5                 |
| 74.9                 |
| 74.7                 |
| 71.2                 |
| 70.0                 |
| 68.1                 |
| 67.9                 |
| 67.4                 |
| 66.4                 |
| 62.6                 |
| 62.1                 |
| 54.0                 |
| 51.6                 |
| 51.5                 |
| 45.2                 |
| 44.1                 |
| 41.8                 |
| 38.9                 |
| 37.8                 |
| 36.3                 |
| 34.8                 |
| 32.0                 |
| 31.3                 |
| 30.7                 |
| 29.1                 |
| 29.0                 |
| 26.9                 |
| 26.4                 |
| 26.1                 |
| 23.0                 |
| 21.8                 |
| 19.7                 |
| 19.6                 |
| 17.9                 |
| 17.6                 |



The chemical structure shows a complex molecule with a central aglycone core. The aglycone is a polycyclic system with several functional groups, including hydroxyl groups, a ketone, and a double bond. It is linked to a series of sugar units (glucose and galactose) via glycosidic bonds. The structure is highly detailed, showing stereochemistry and various substituents.

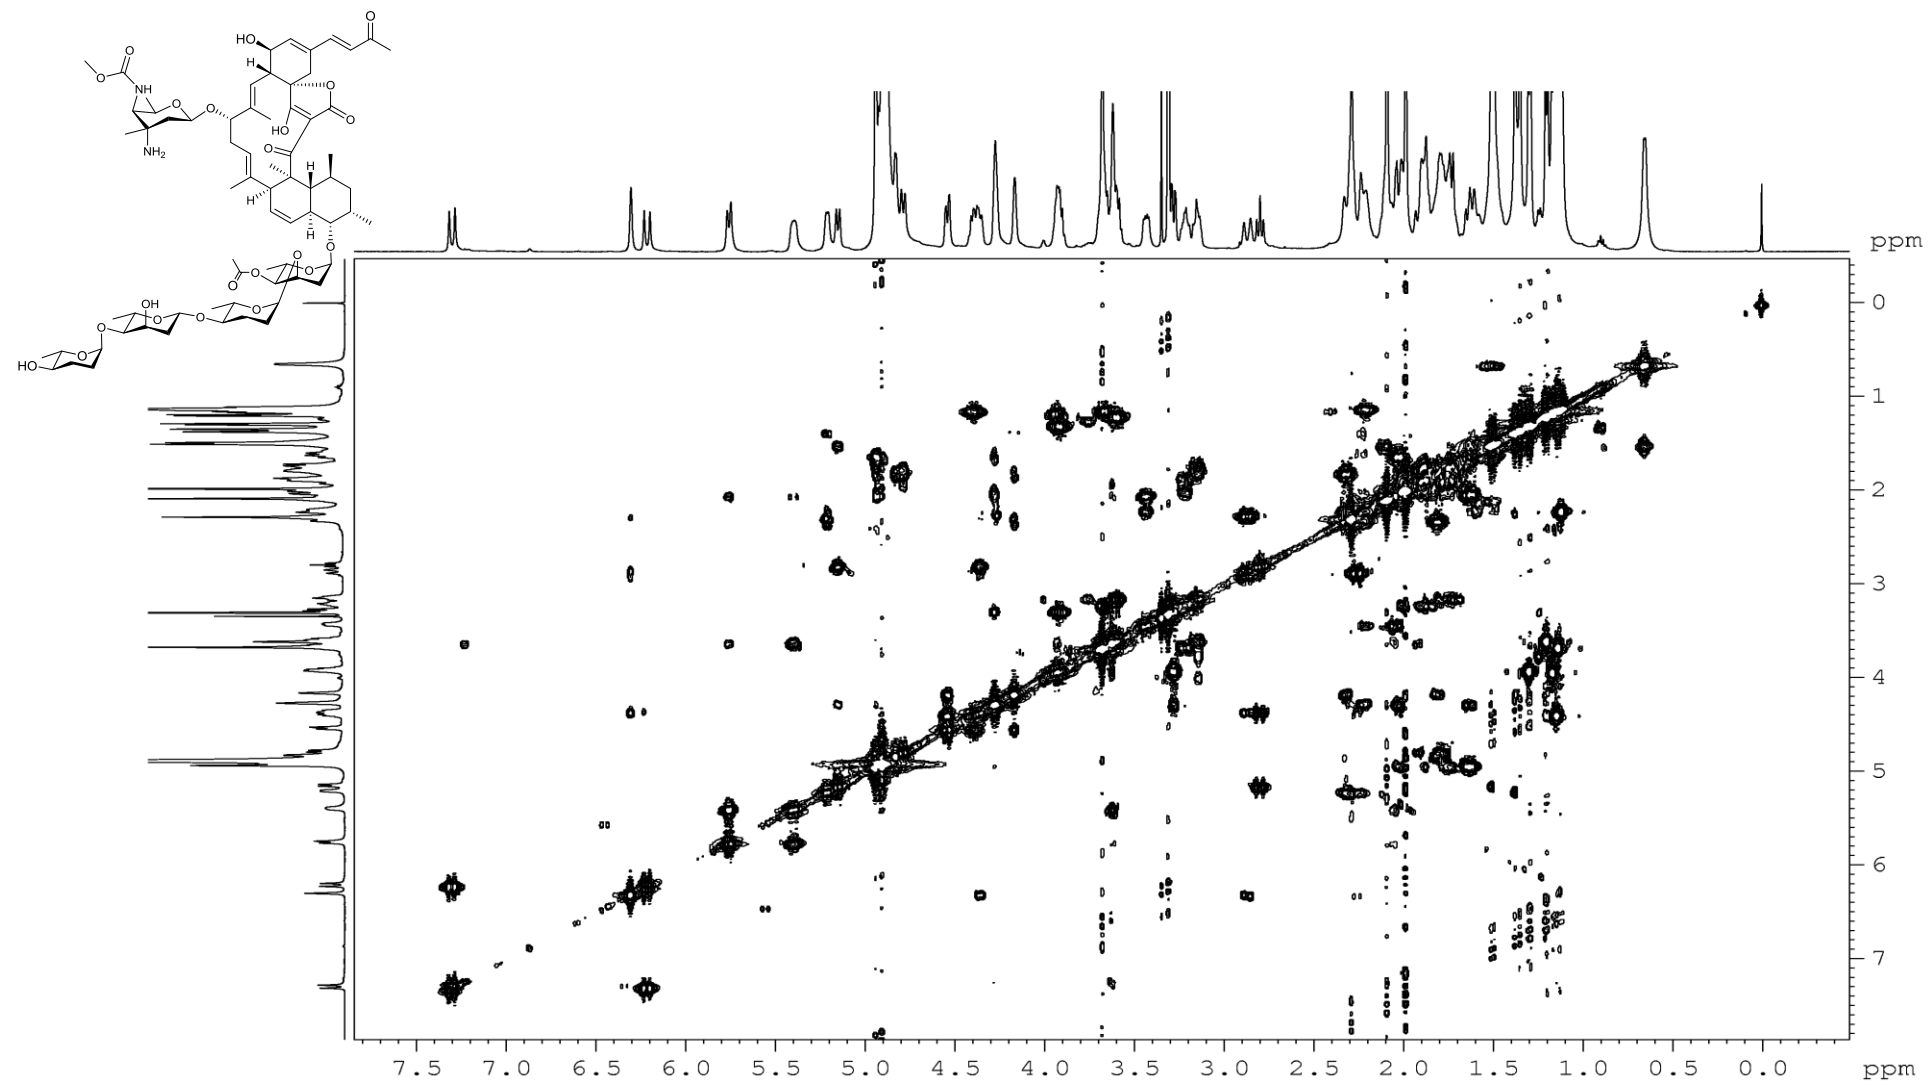

**Figure S41.** HSQC spectrum of compound **6** in CD<sub>3</sub>OD.

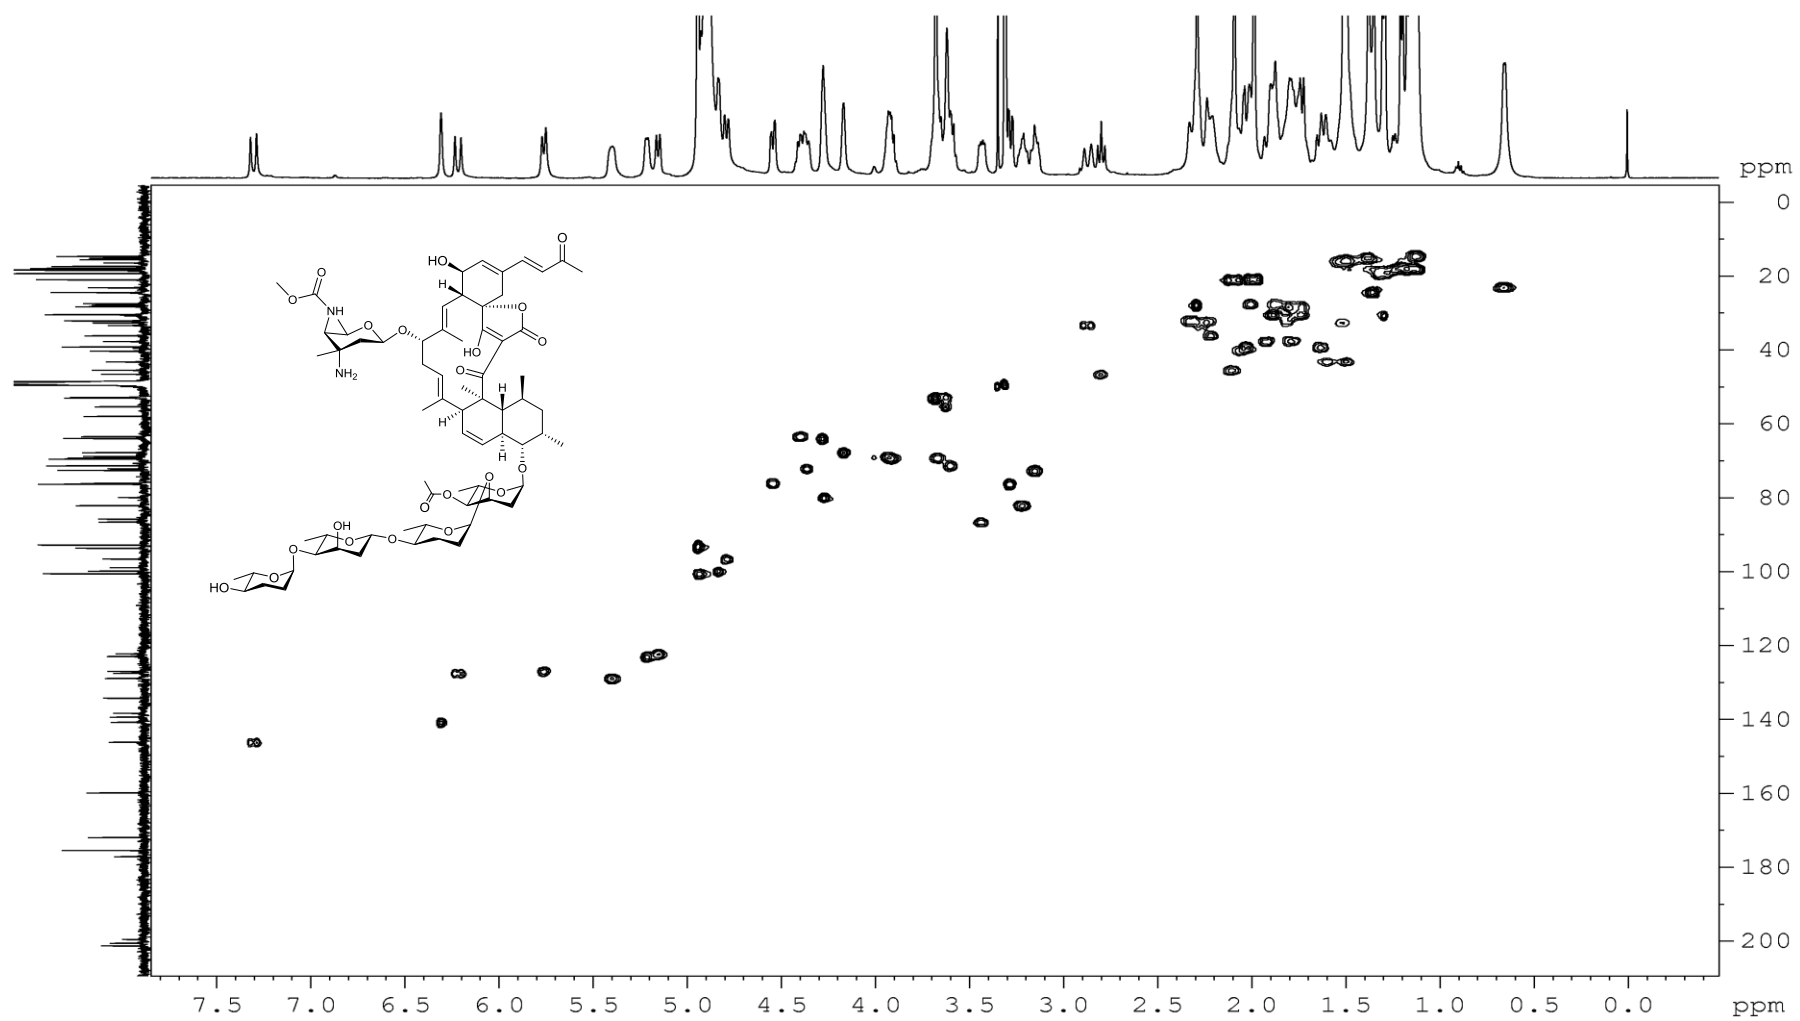

**Figure S42.** HMBC spectrum of compound **6** in CD<sub>3</sub>OD.

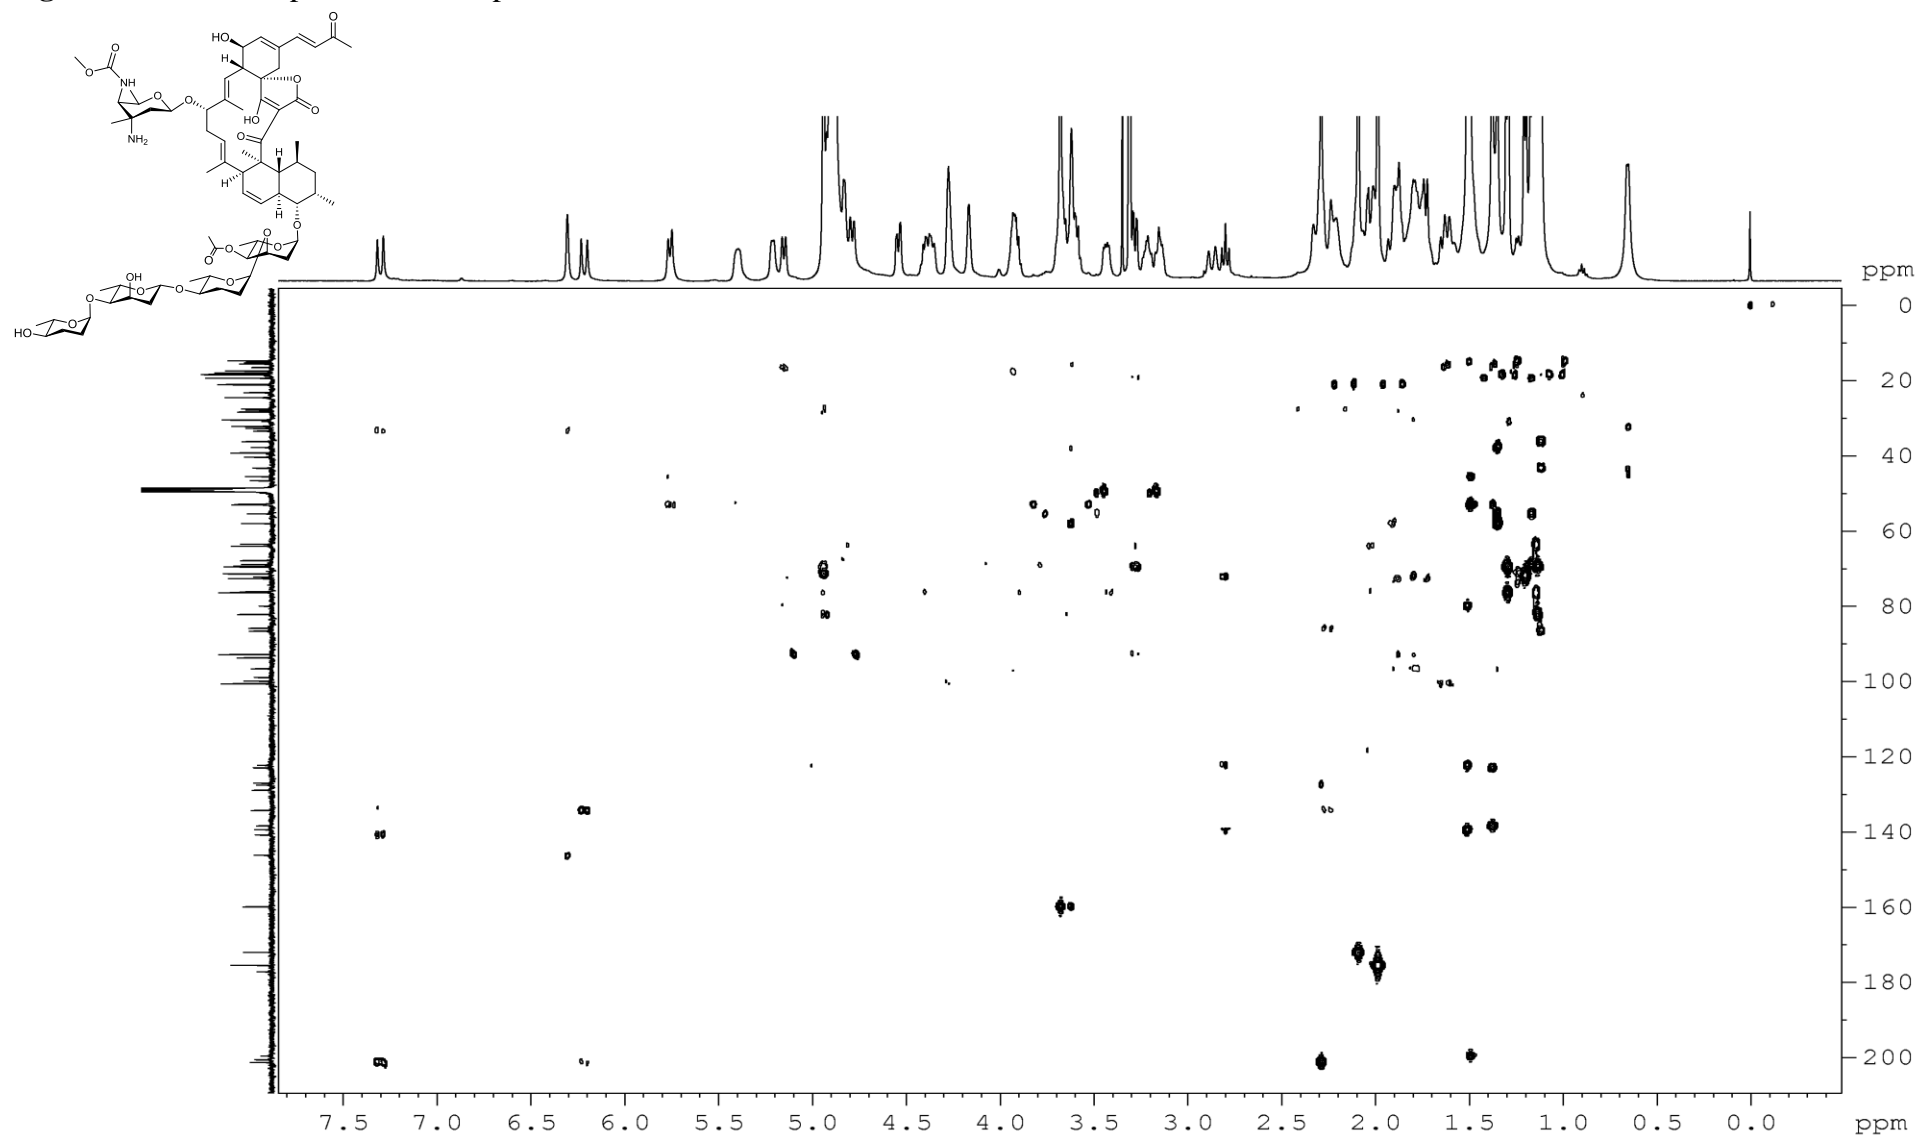

**Figure S43.**  $^1\text{H}$  NMR (500 MHz) spectrum of compound **7** in  $\text{CD}_3\text{OD}$ .

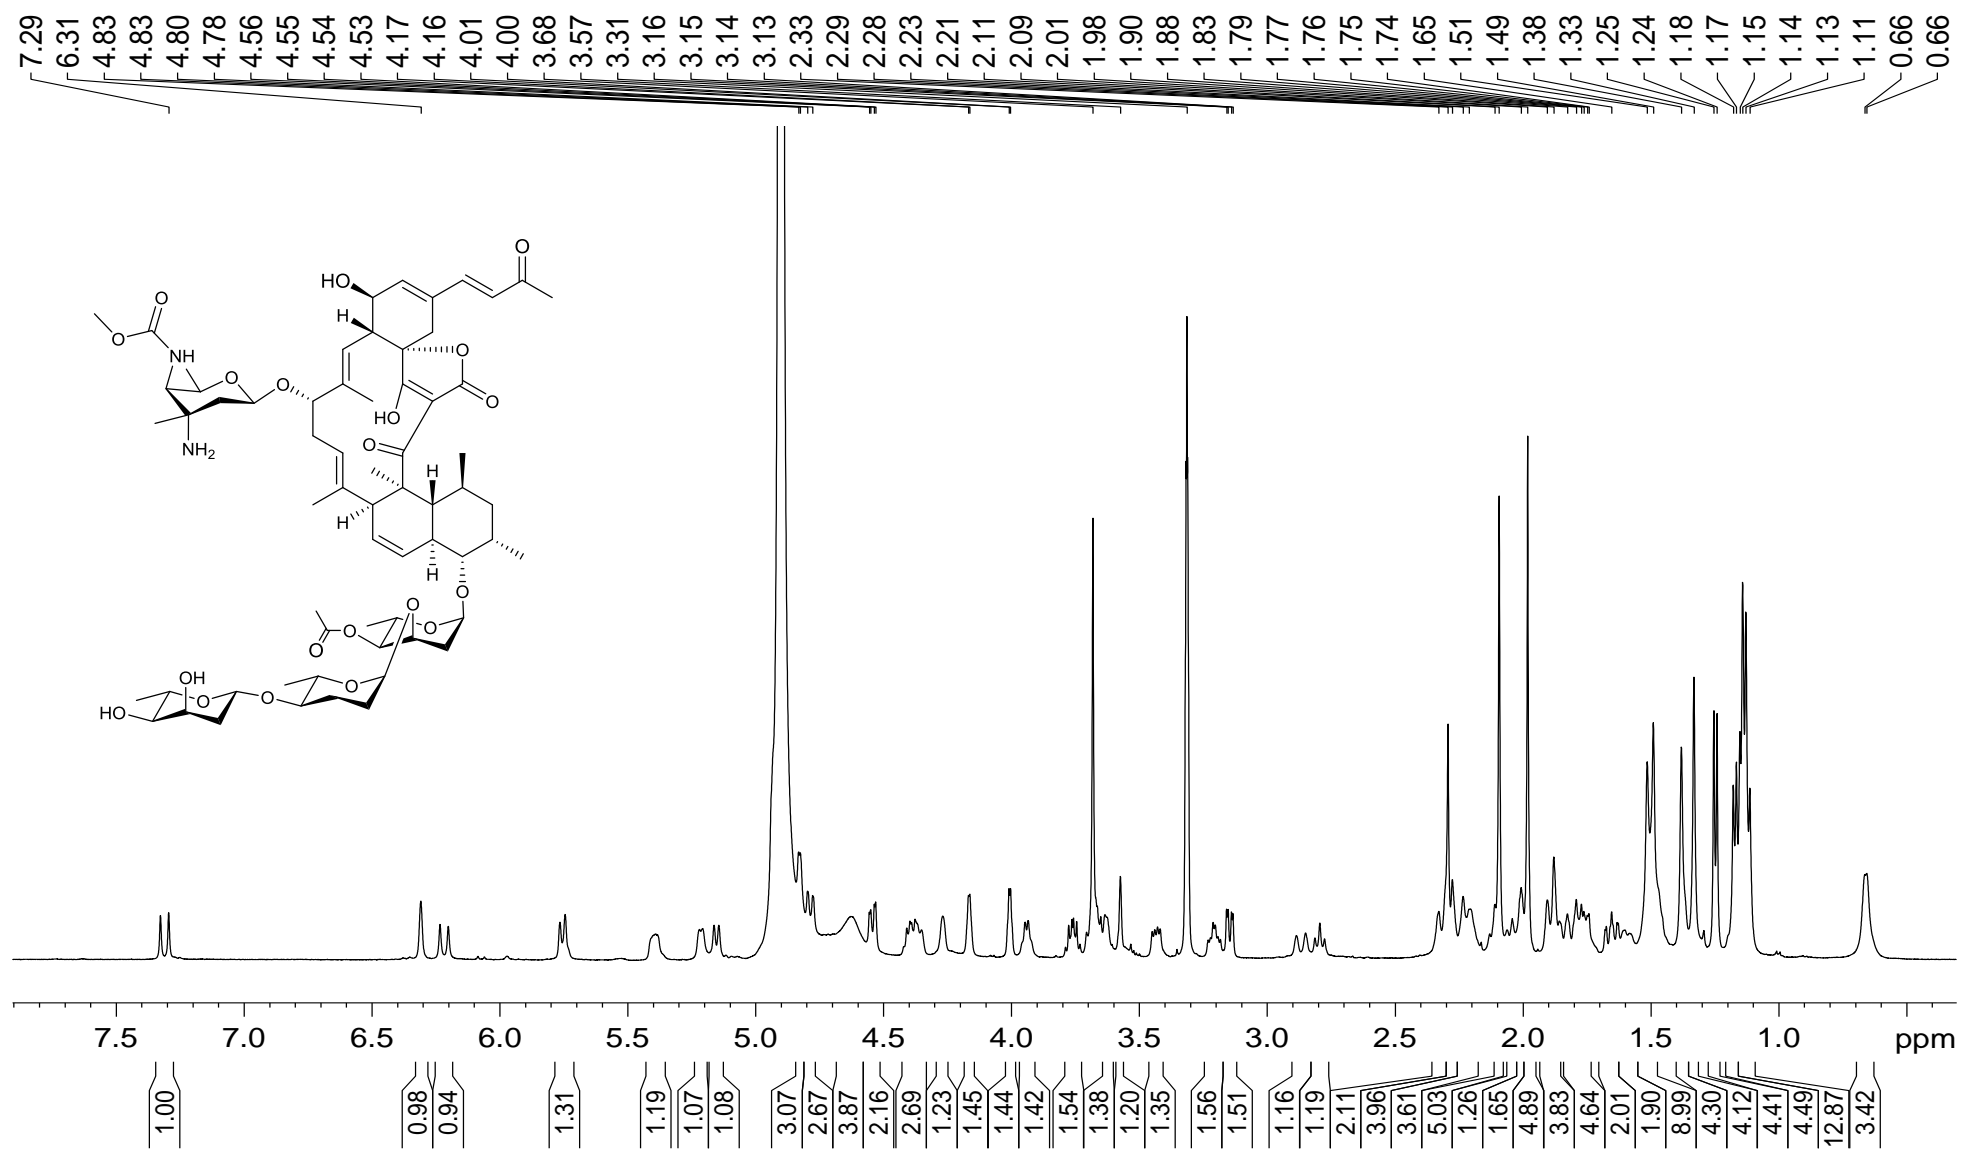

**Figure S44.**  $^{13}\text{C}$  NMR (125 MHz) spectrum of compound **7** in  $\text{CD}_3\text{OD}$ .

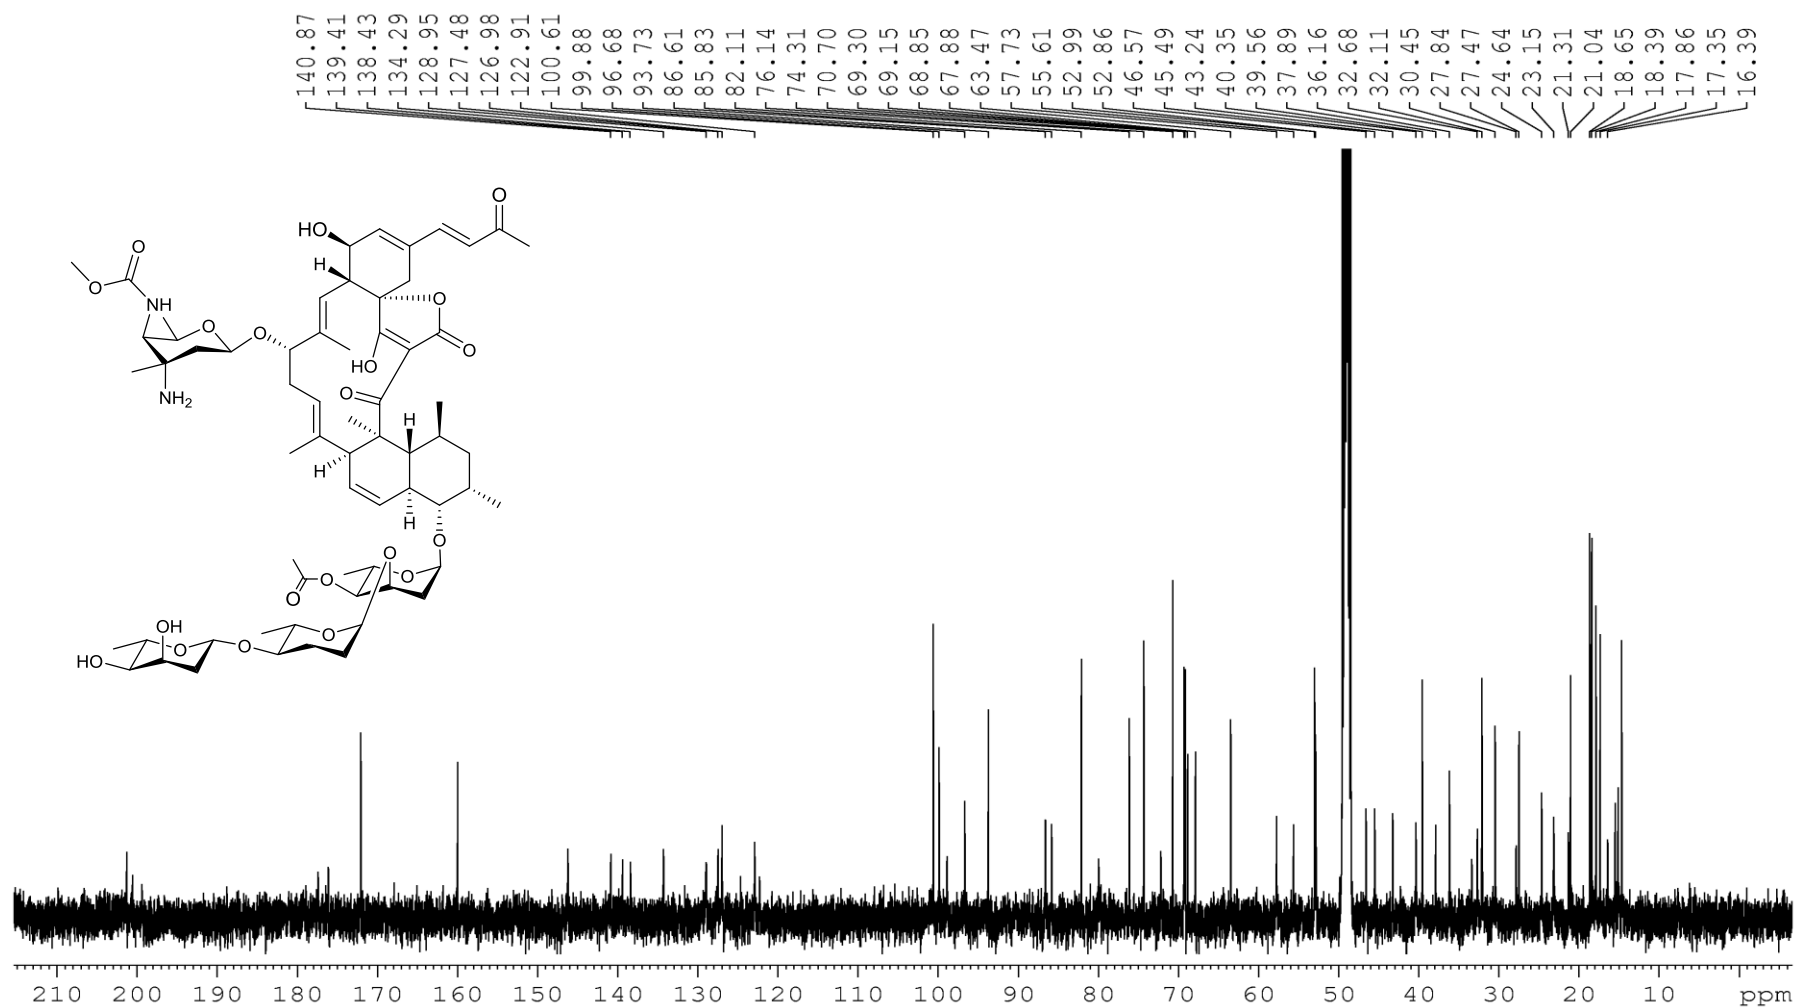

**Figure S45.**  $^{13}\text{C}$  DEPT spectrum of compound **7** in  $\text{CD}_3\text{OD}$ .

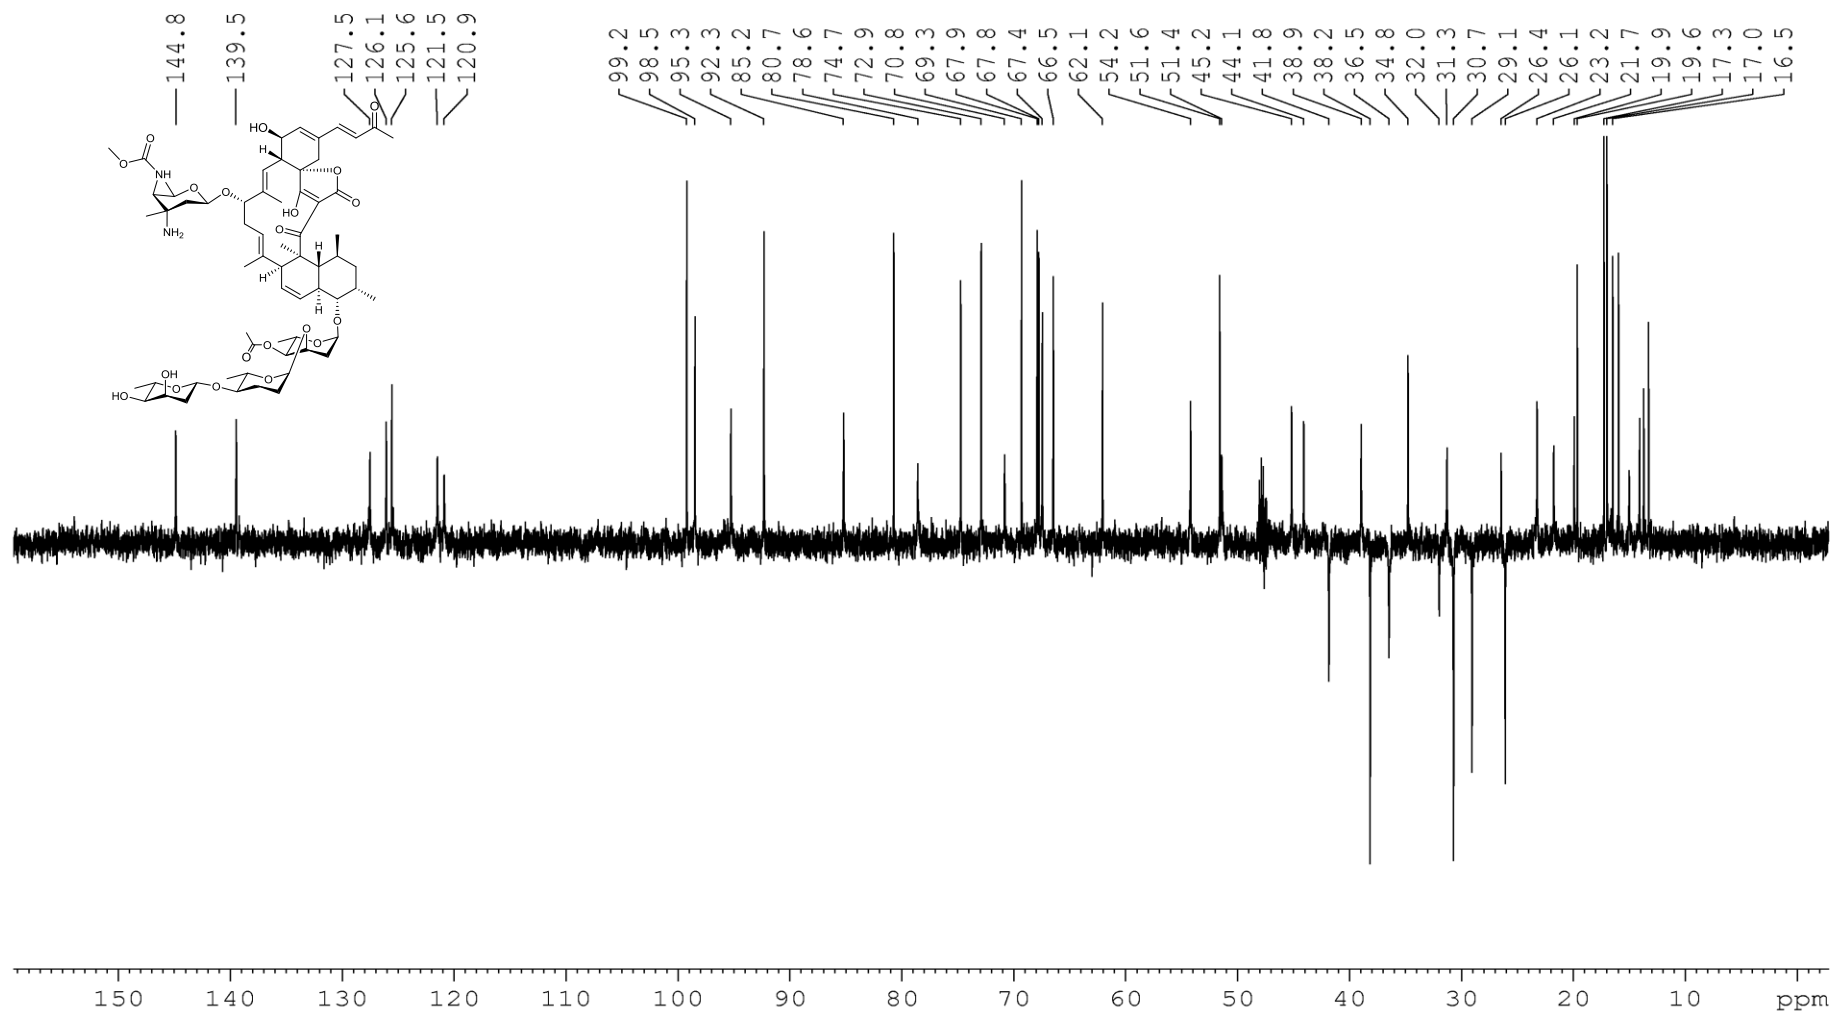

**Figure S46.**  $^1\text{H}$ - $^1\text{H}$  COSY spectrum of compound **7** in  $\text{CD}_3\text{OD}$ .

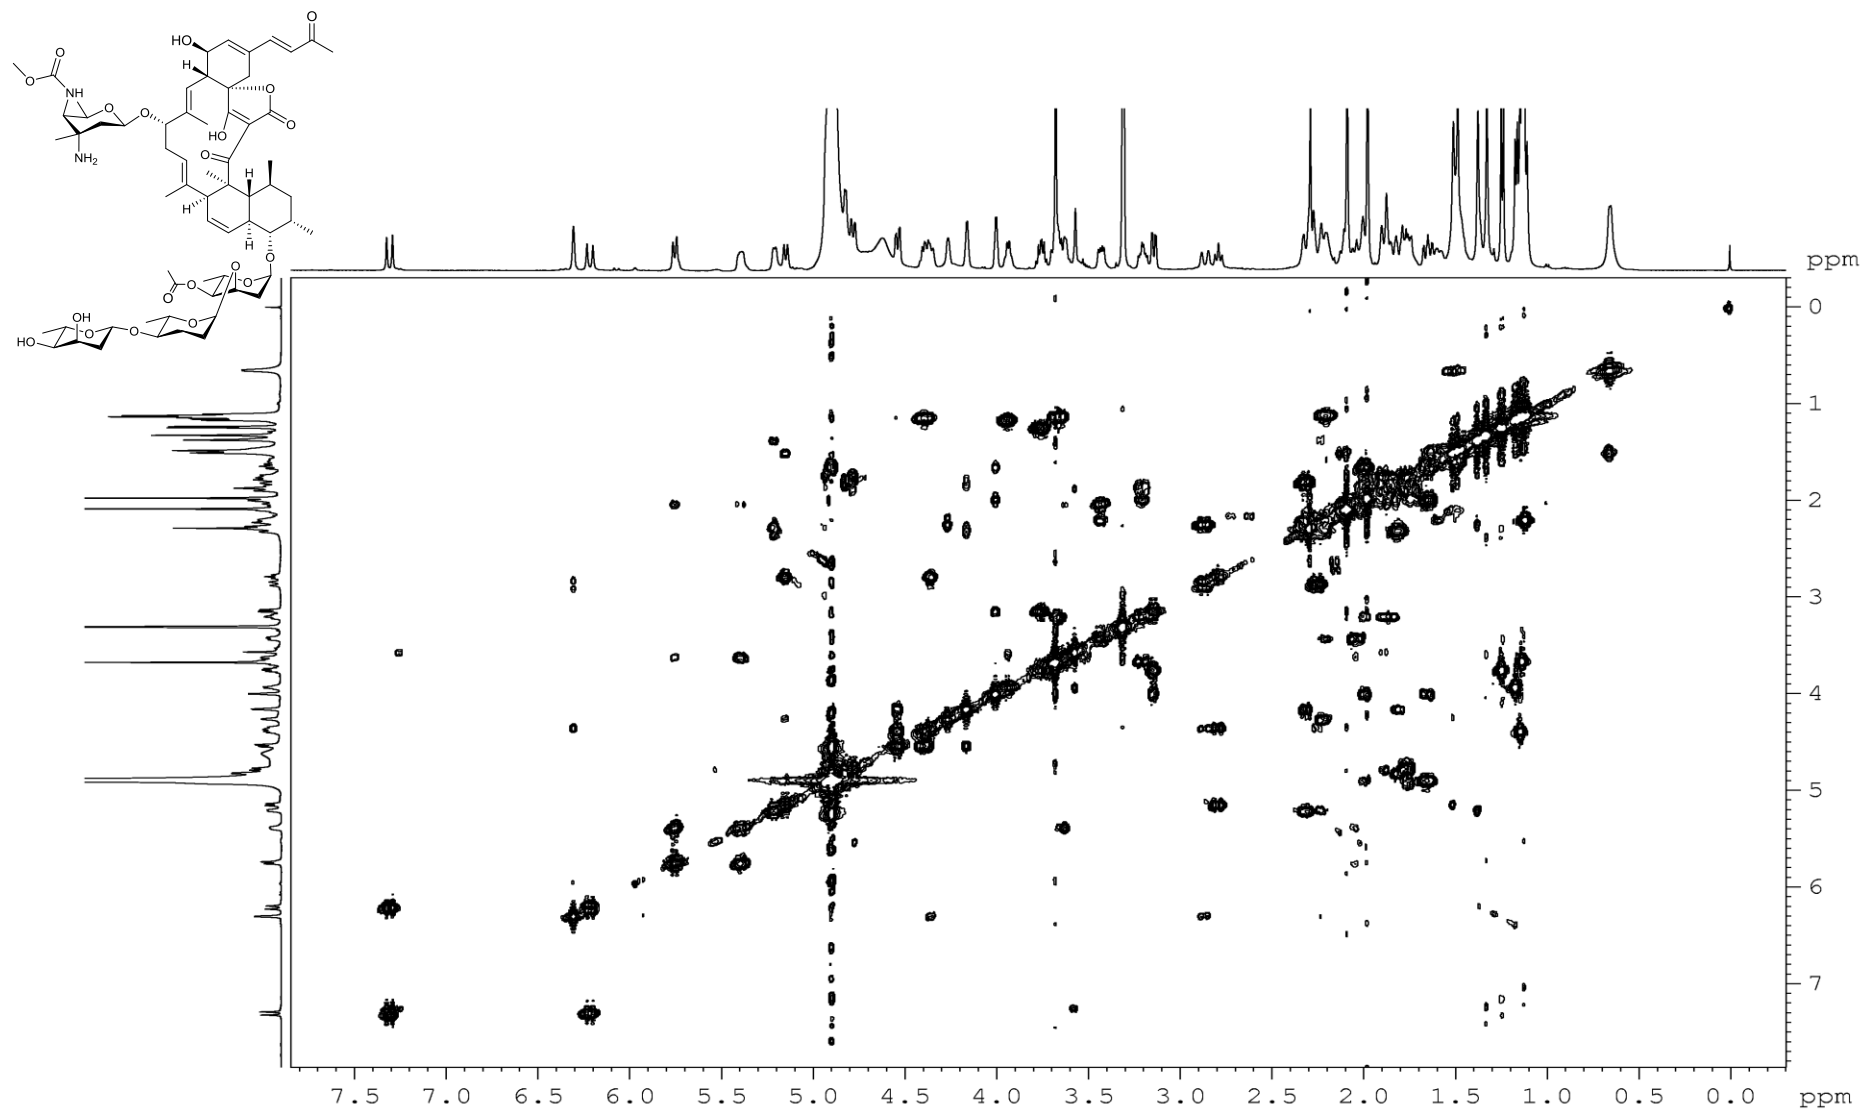

**Figure S47.** HSQC spectrum of compound **7** in CD<sub>3</sub>OD.

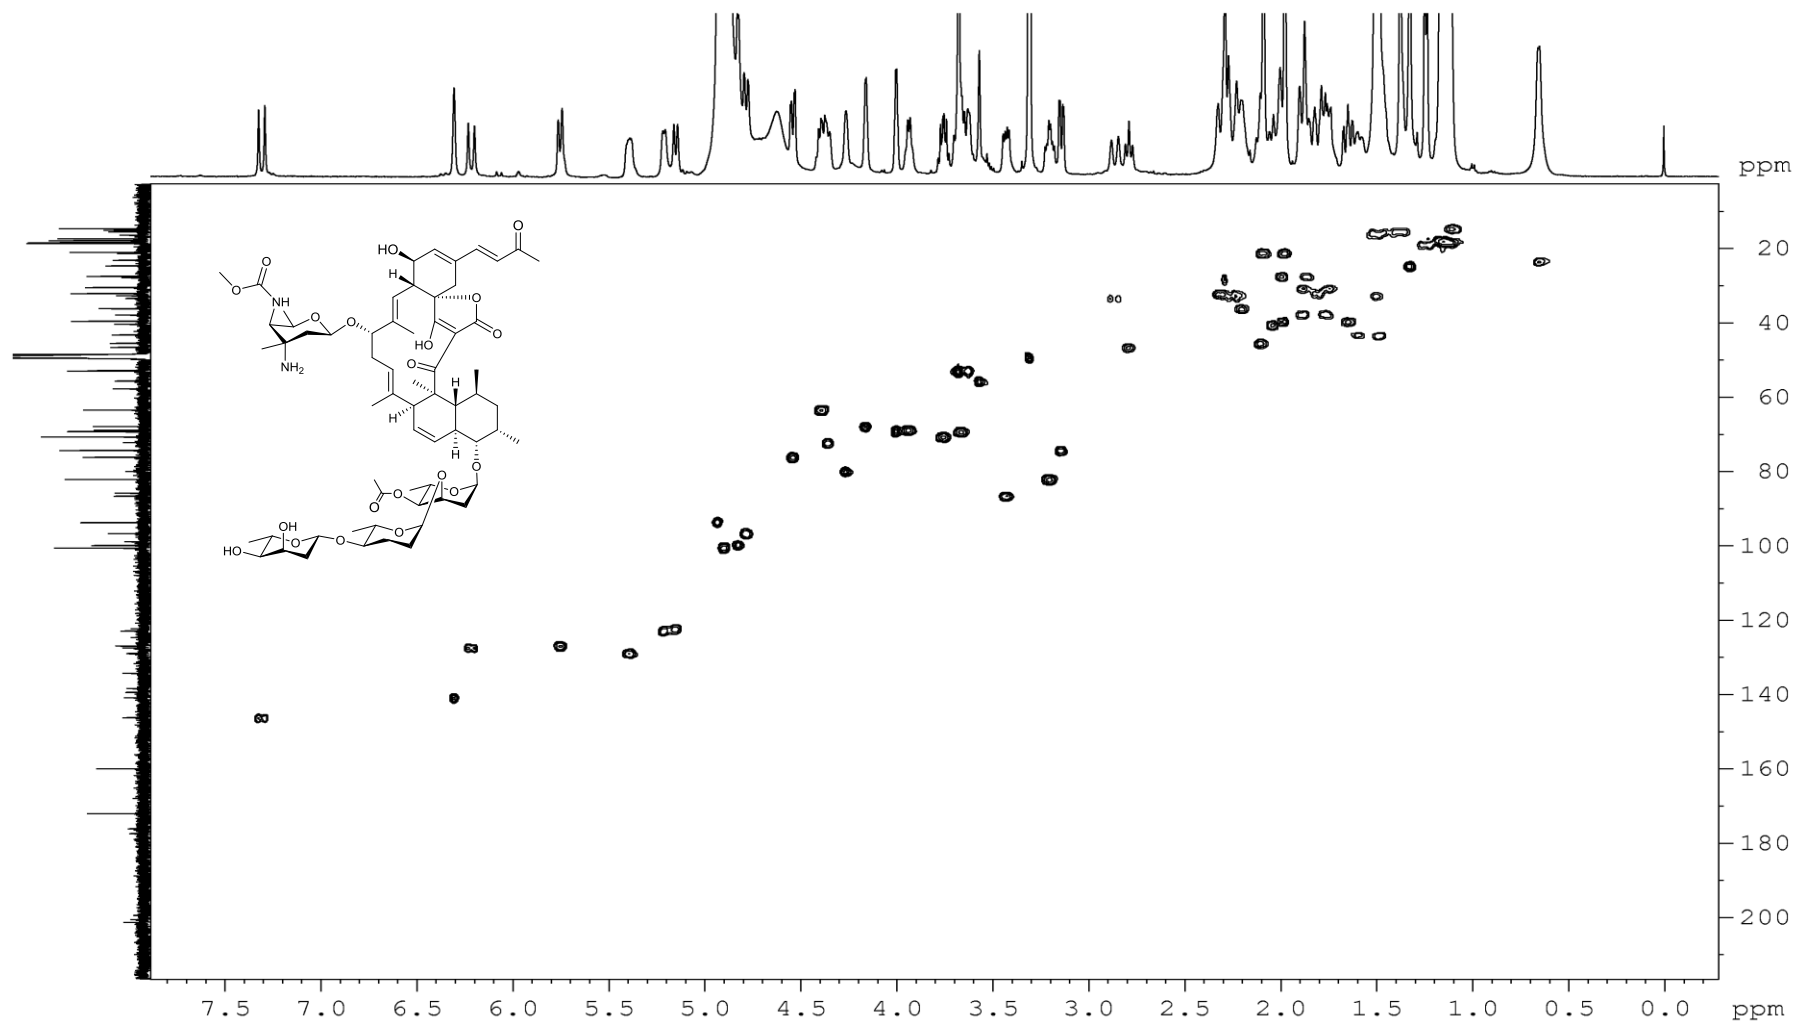



**Figure S48.** HMBC spectrum of compound **7** in CD<sub>3</sub>OD.

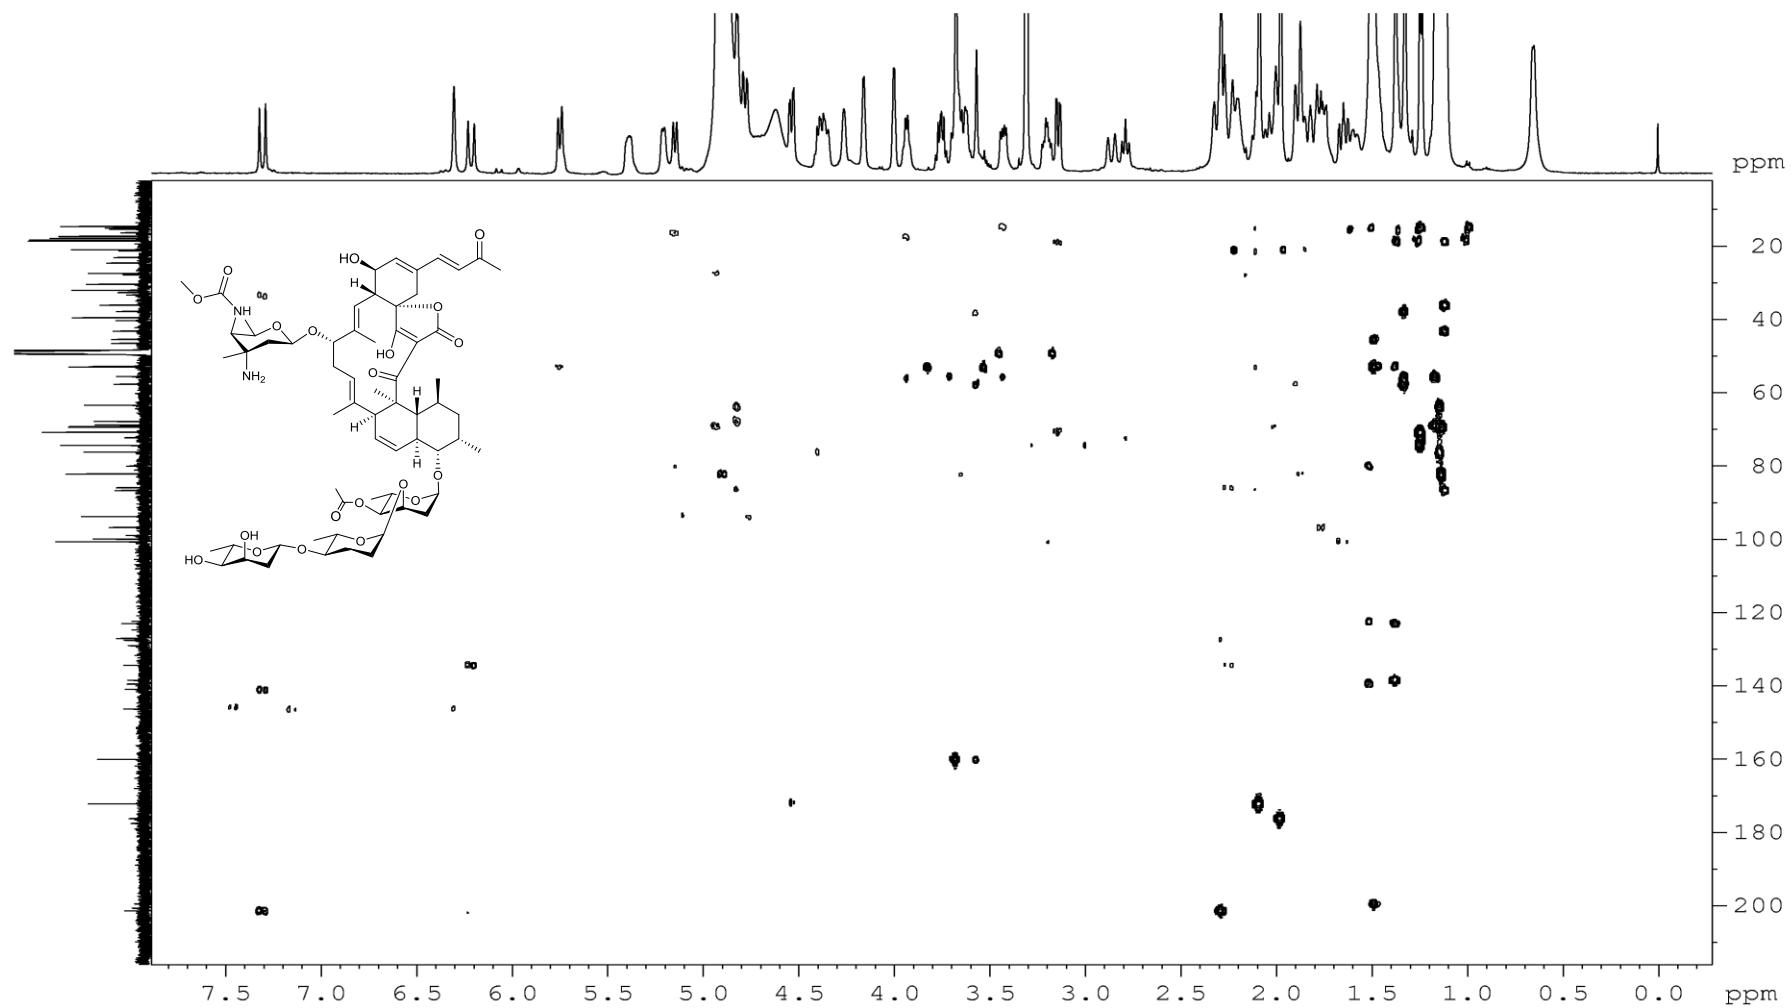

**Figure S49.** NOESY spectrum of compound **7** in CD<sub>3</sub>OD.

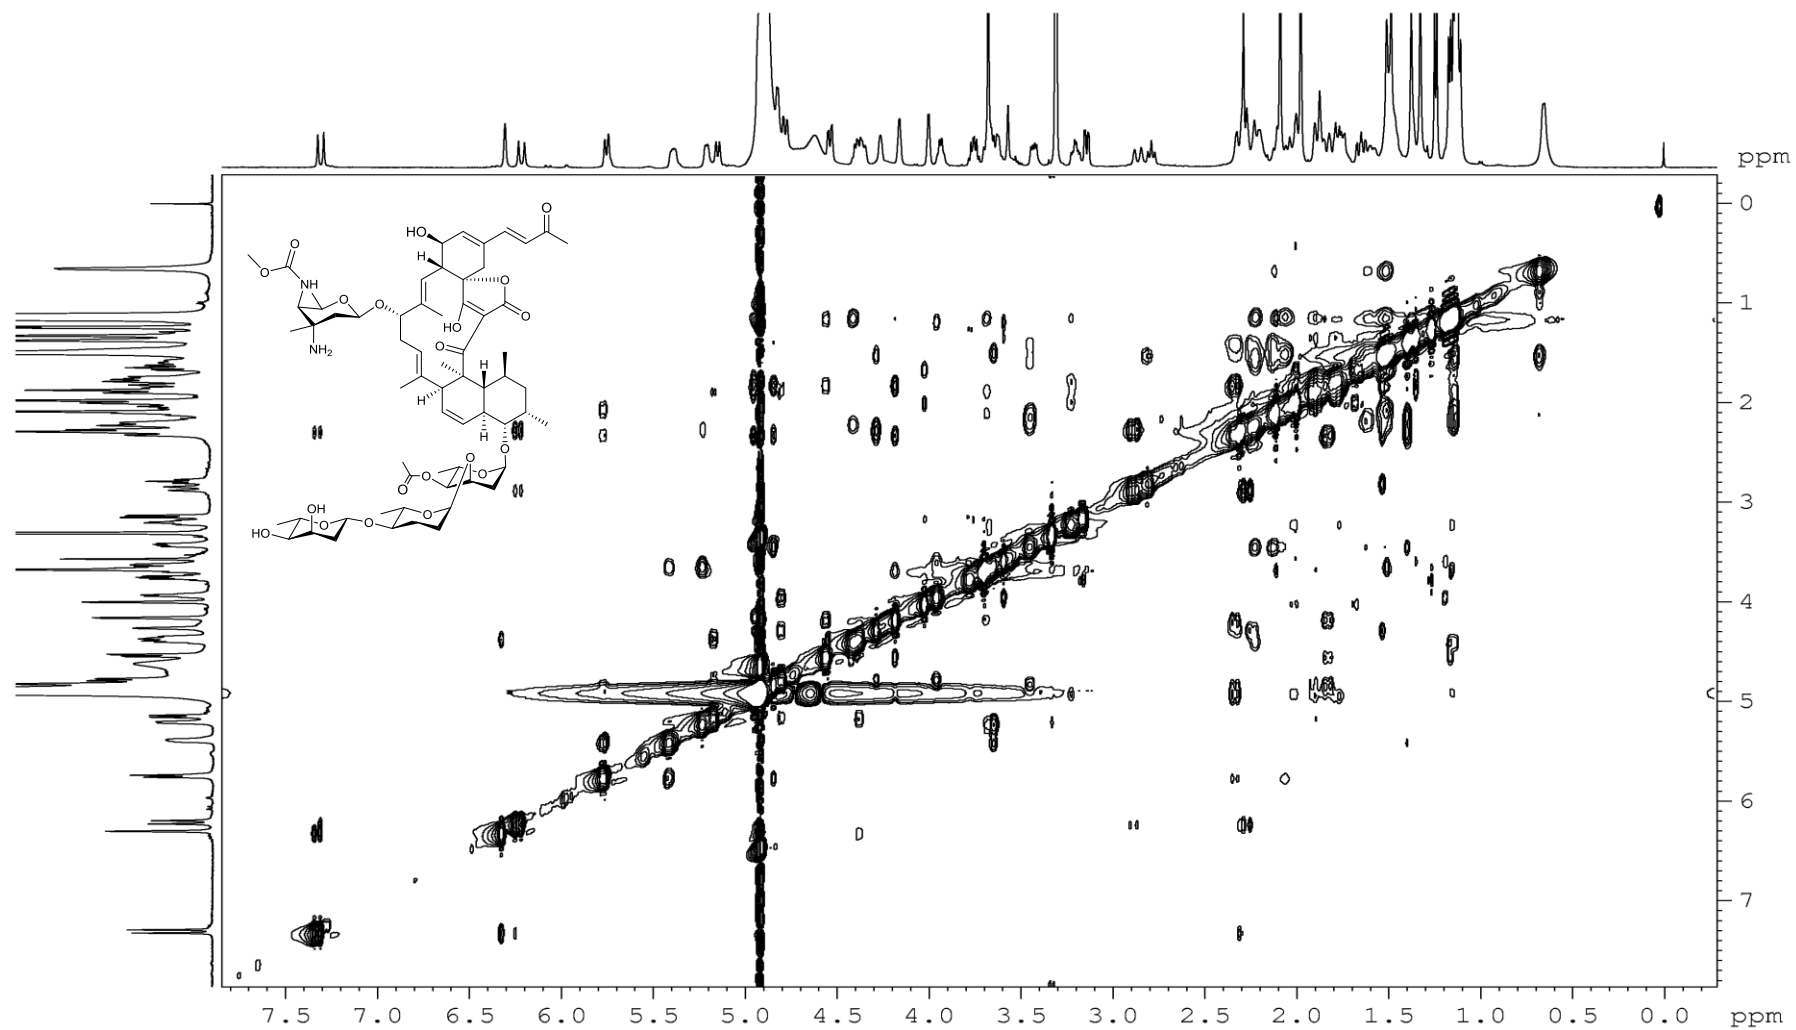

**Figure S50.**  $^1\text{H}$  NMR (700 MHz) spectrum of compound **8** in  $\text{CD}_3\text{OD}$ .

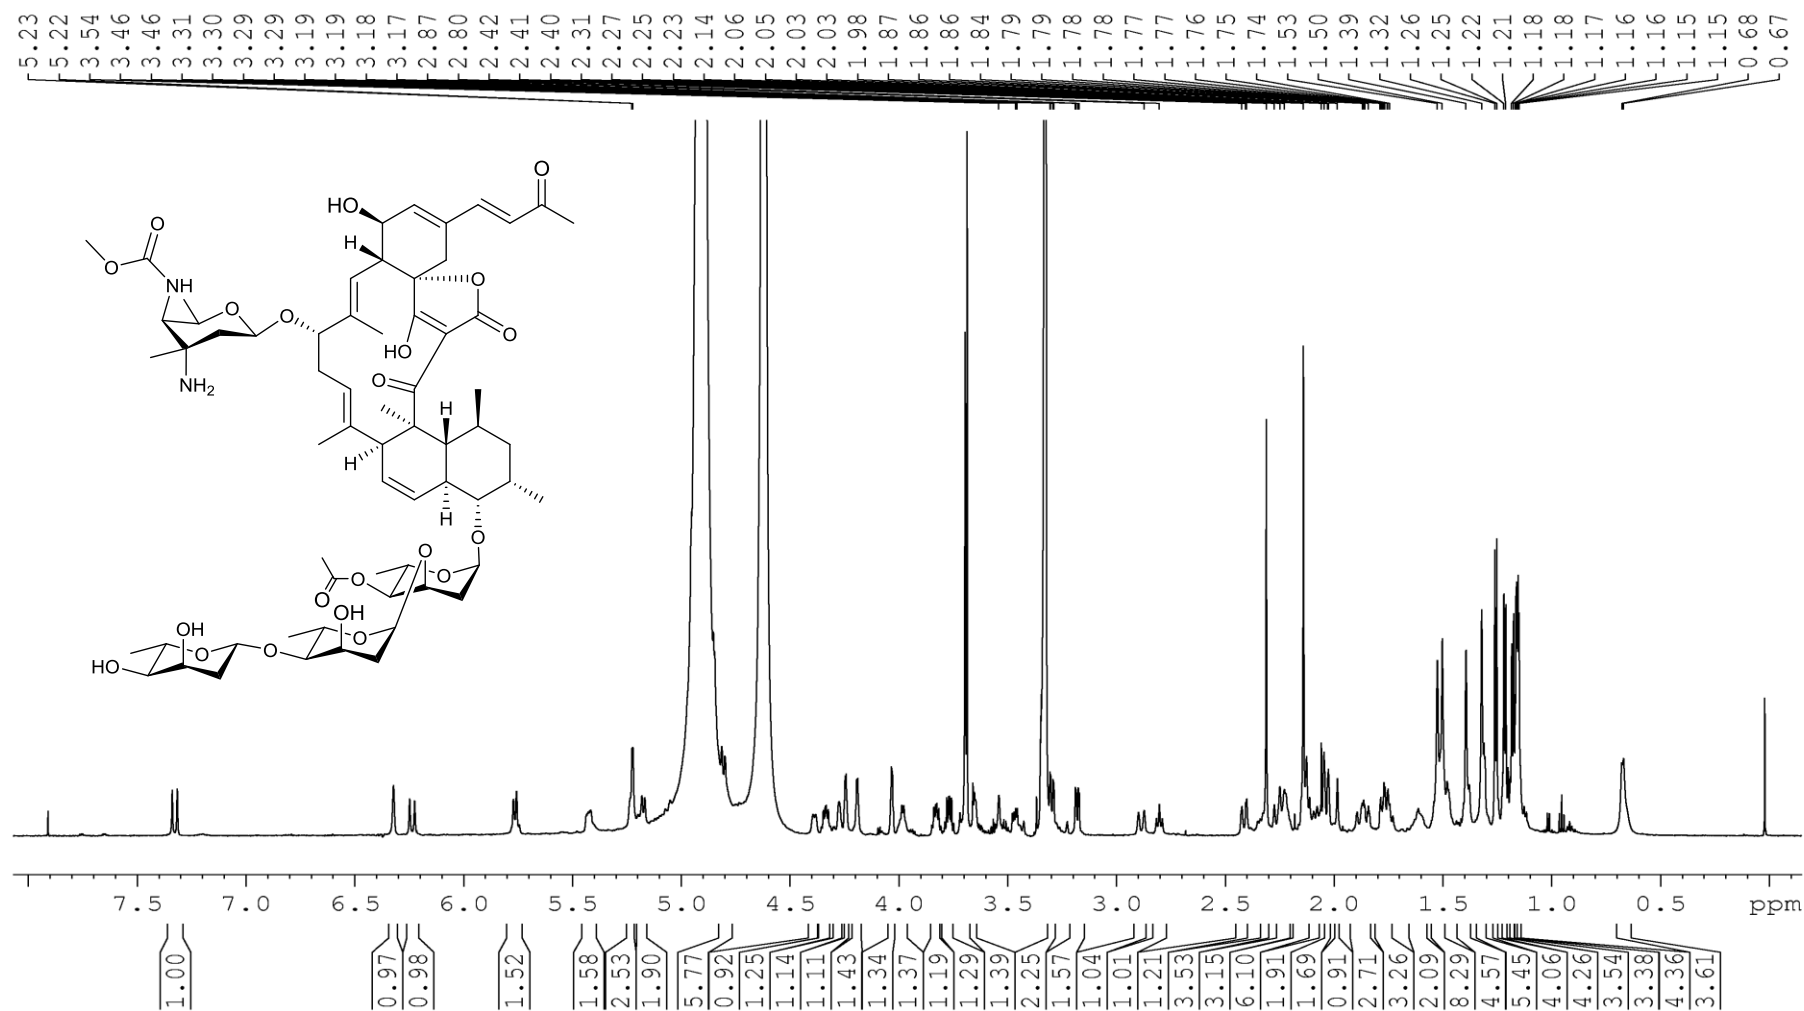

**Figure S51.**  $^{13}\text{C}$  NMR (176 MHz) spectrum of compound **8** in  $\text{CD}_3\text{OD}$ .

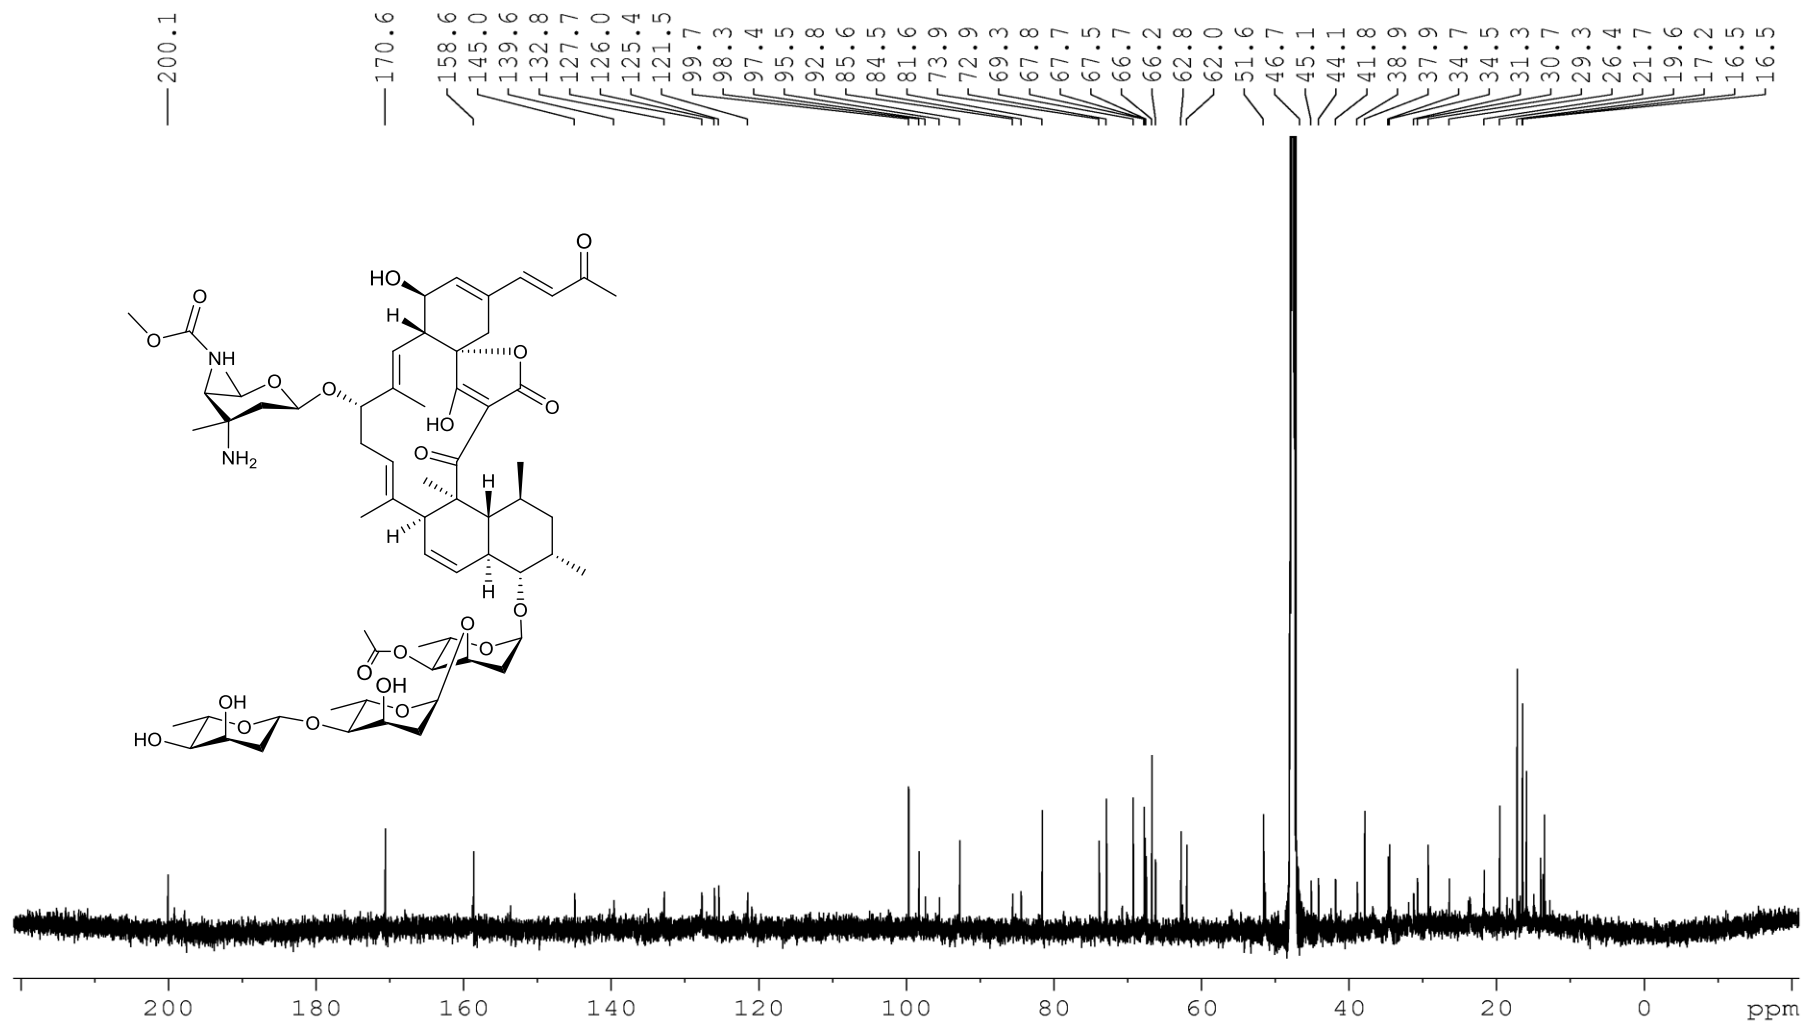

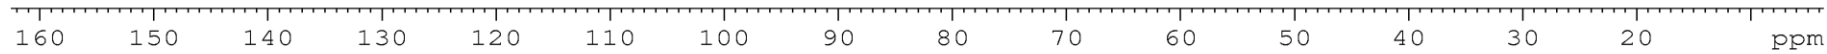

**Figure S53.**  $^1\text{H}$ - $^1\text{H}$  COSY spectrum of compound **8** in  $\text{CD}_3\text{OD}$ .

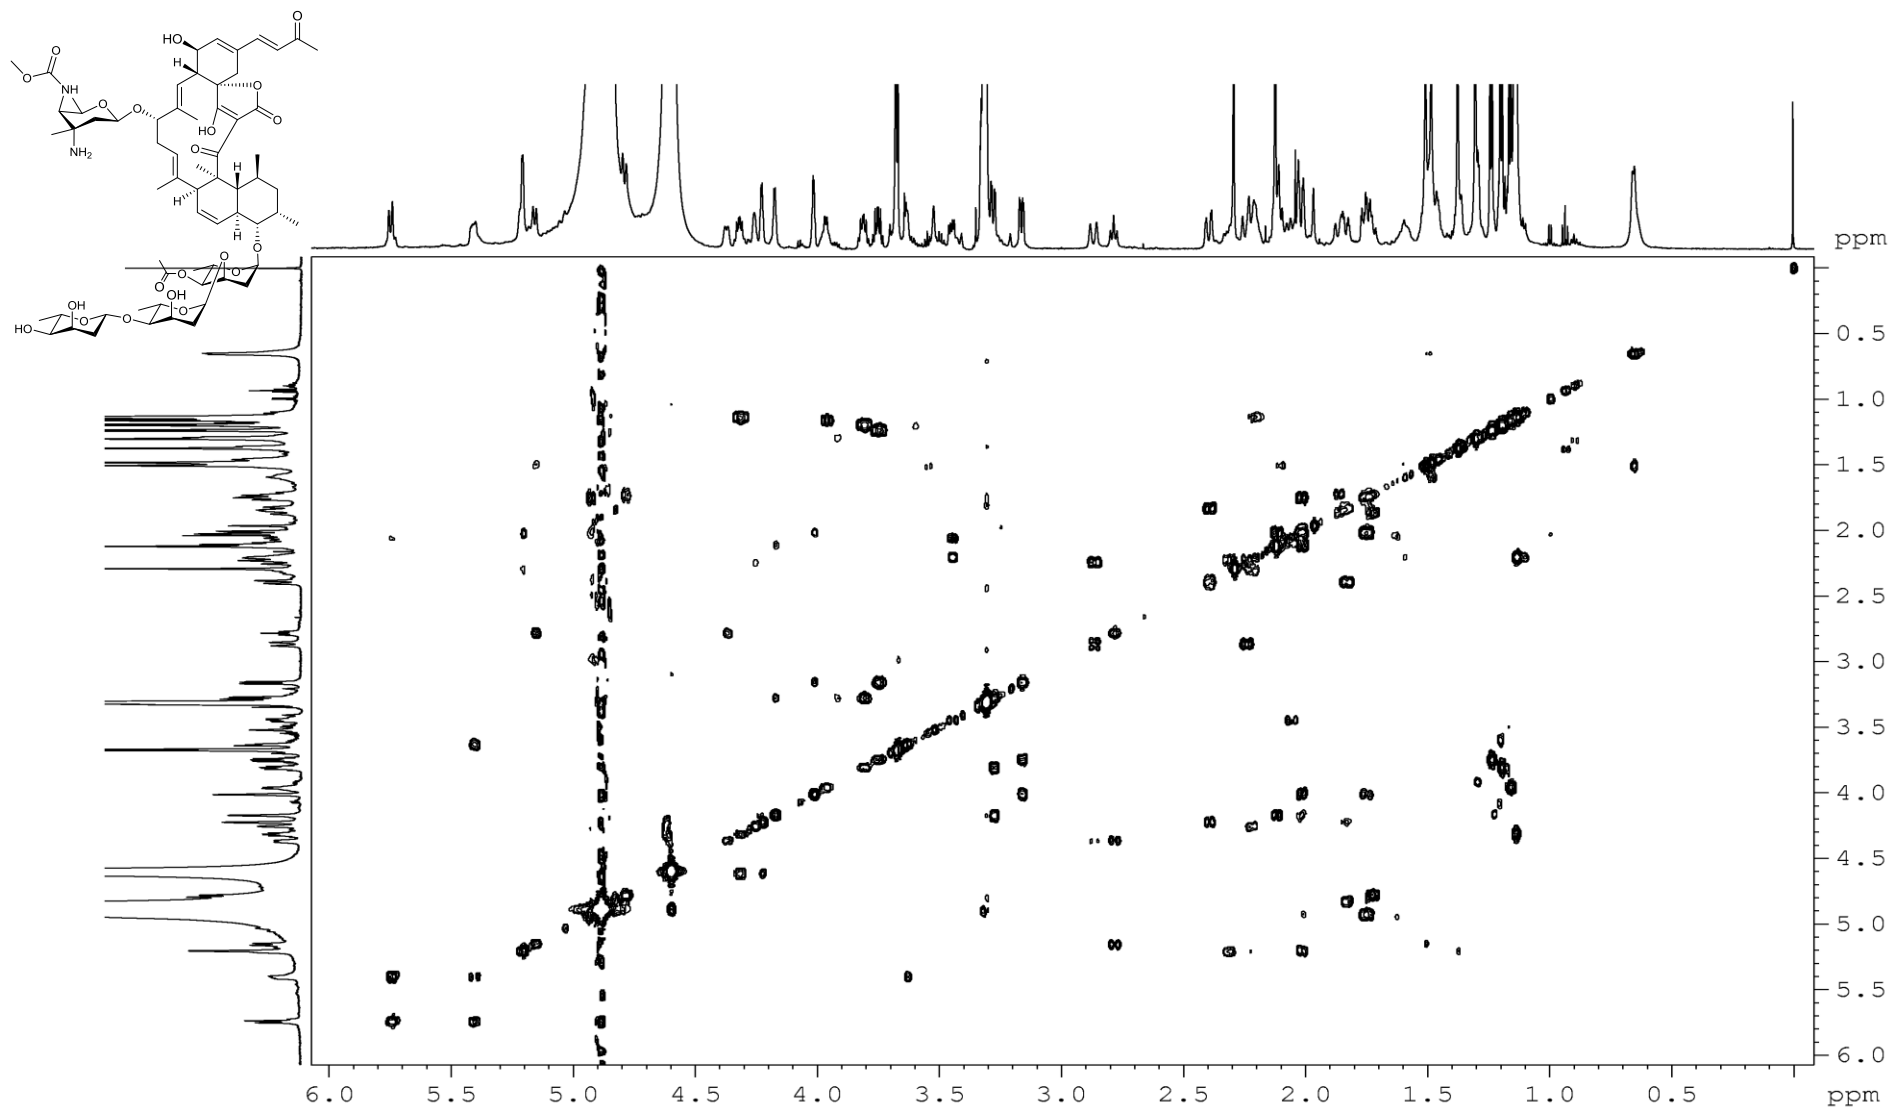

**Figure S54.** HSQC spectrum of compound **8** in CD<sub>3</sub>OD.

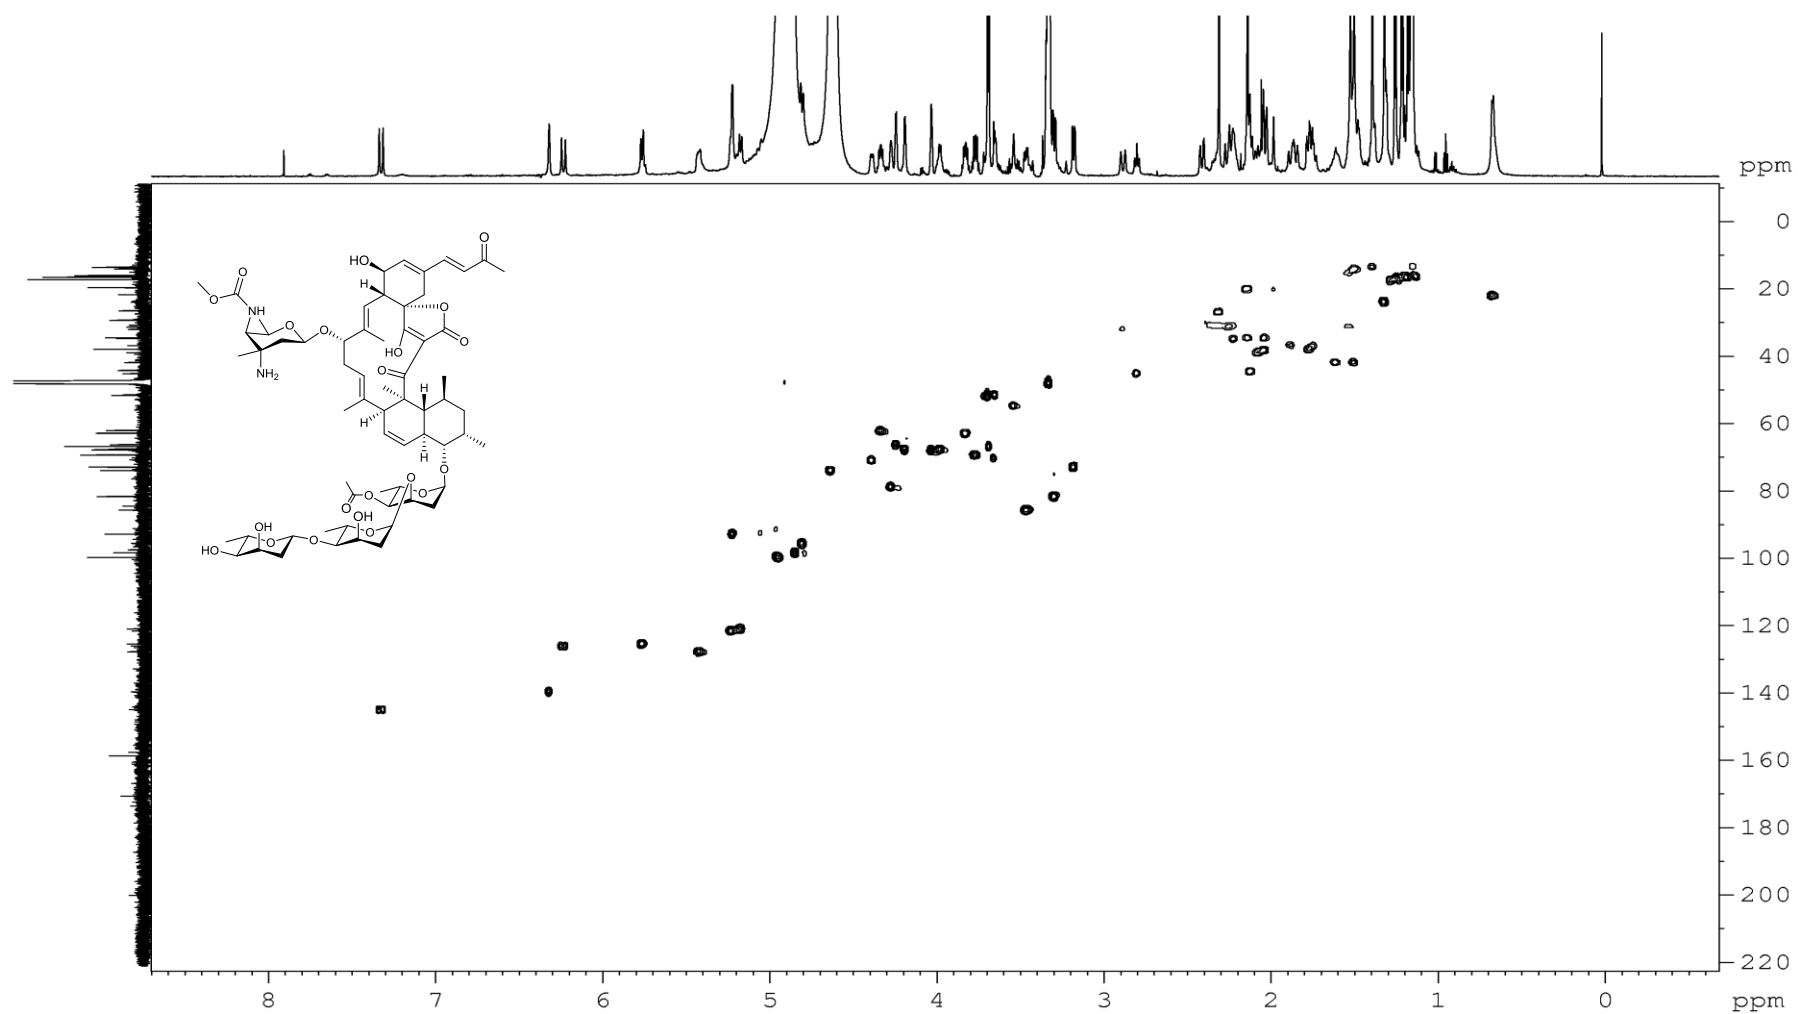

**Figure S55.** HMBC spectrum of compound **8** in CD<sub>3</sub>OD.

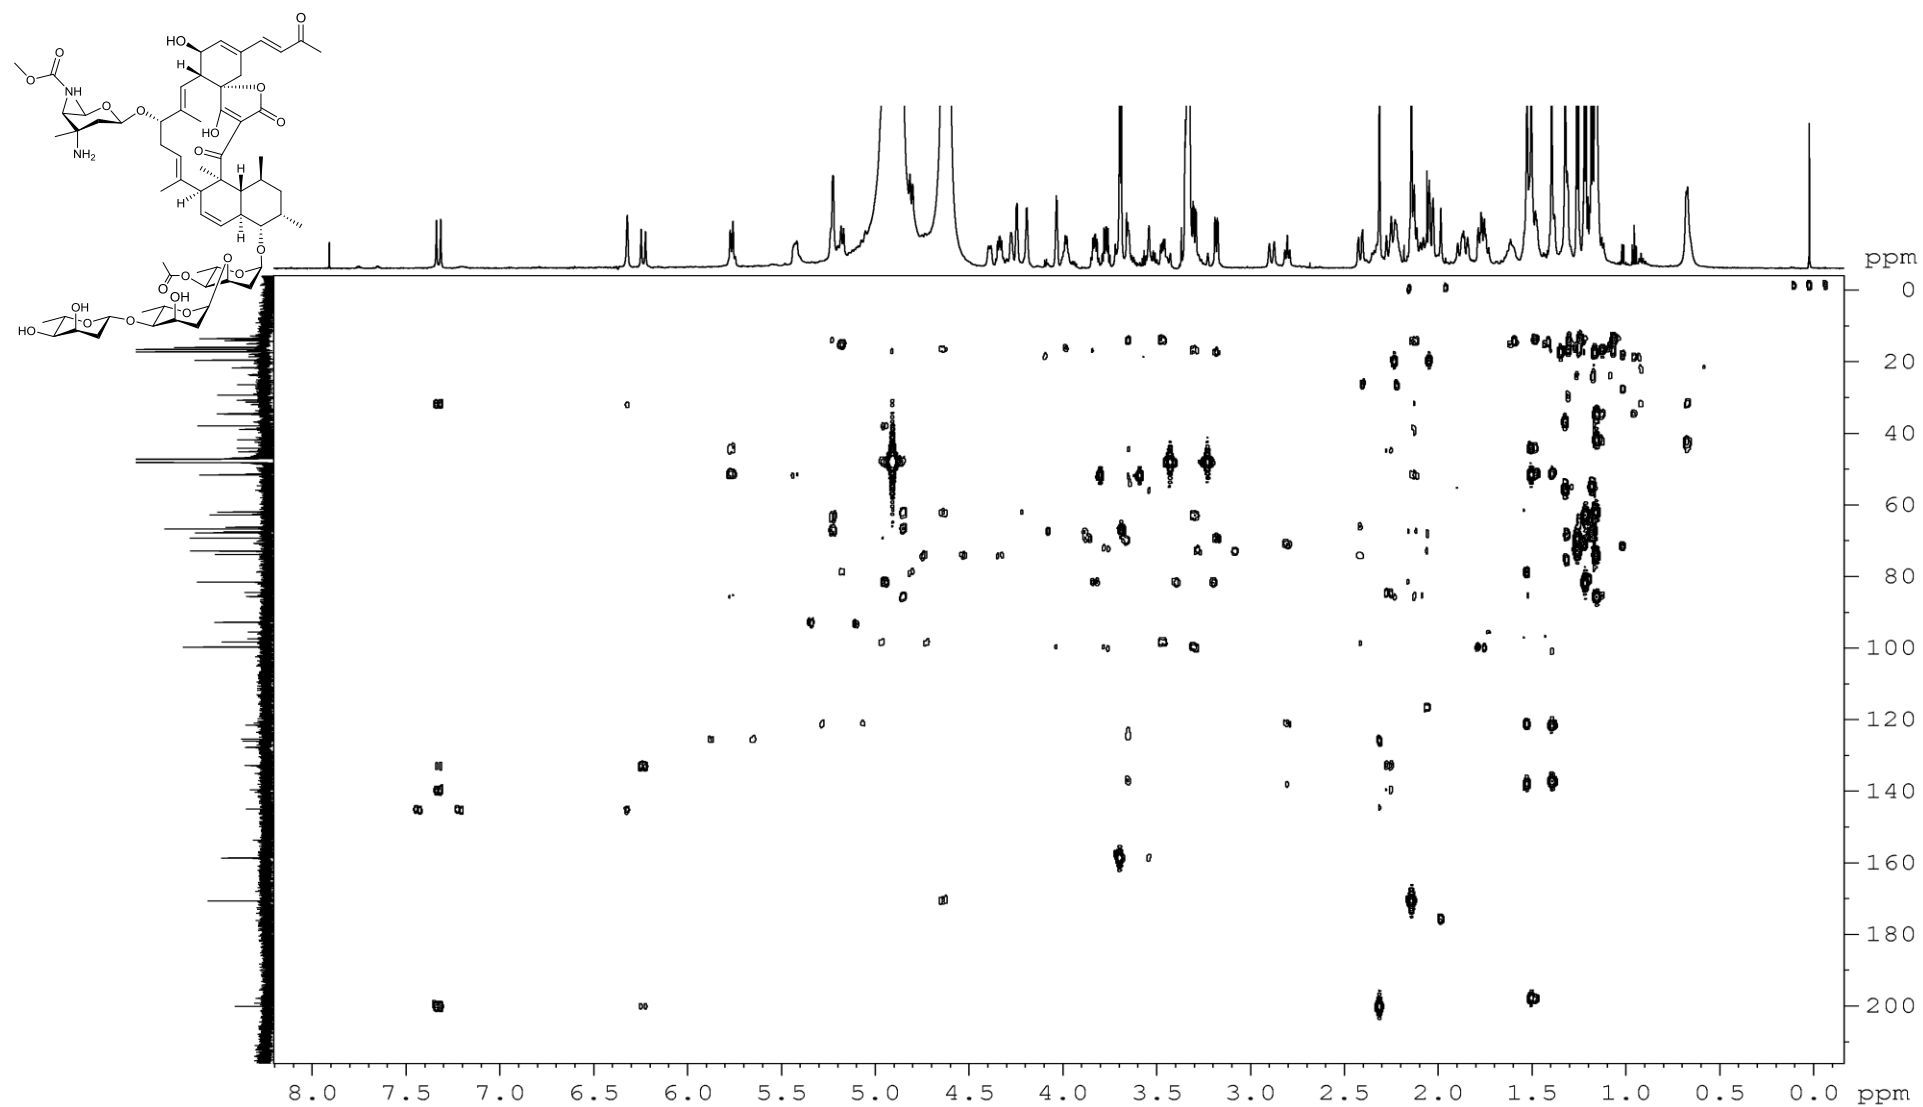



**Figure S56.** NOESY spectrum of compound **8** in CD<sub>3</sub>OD.

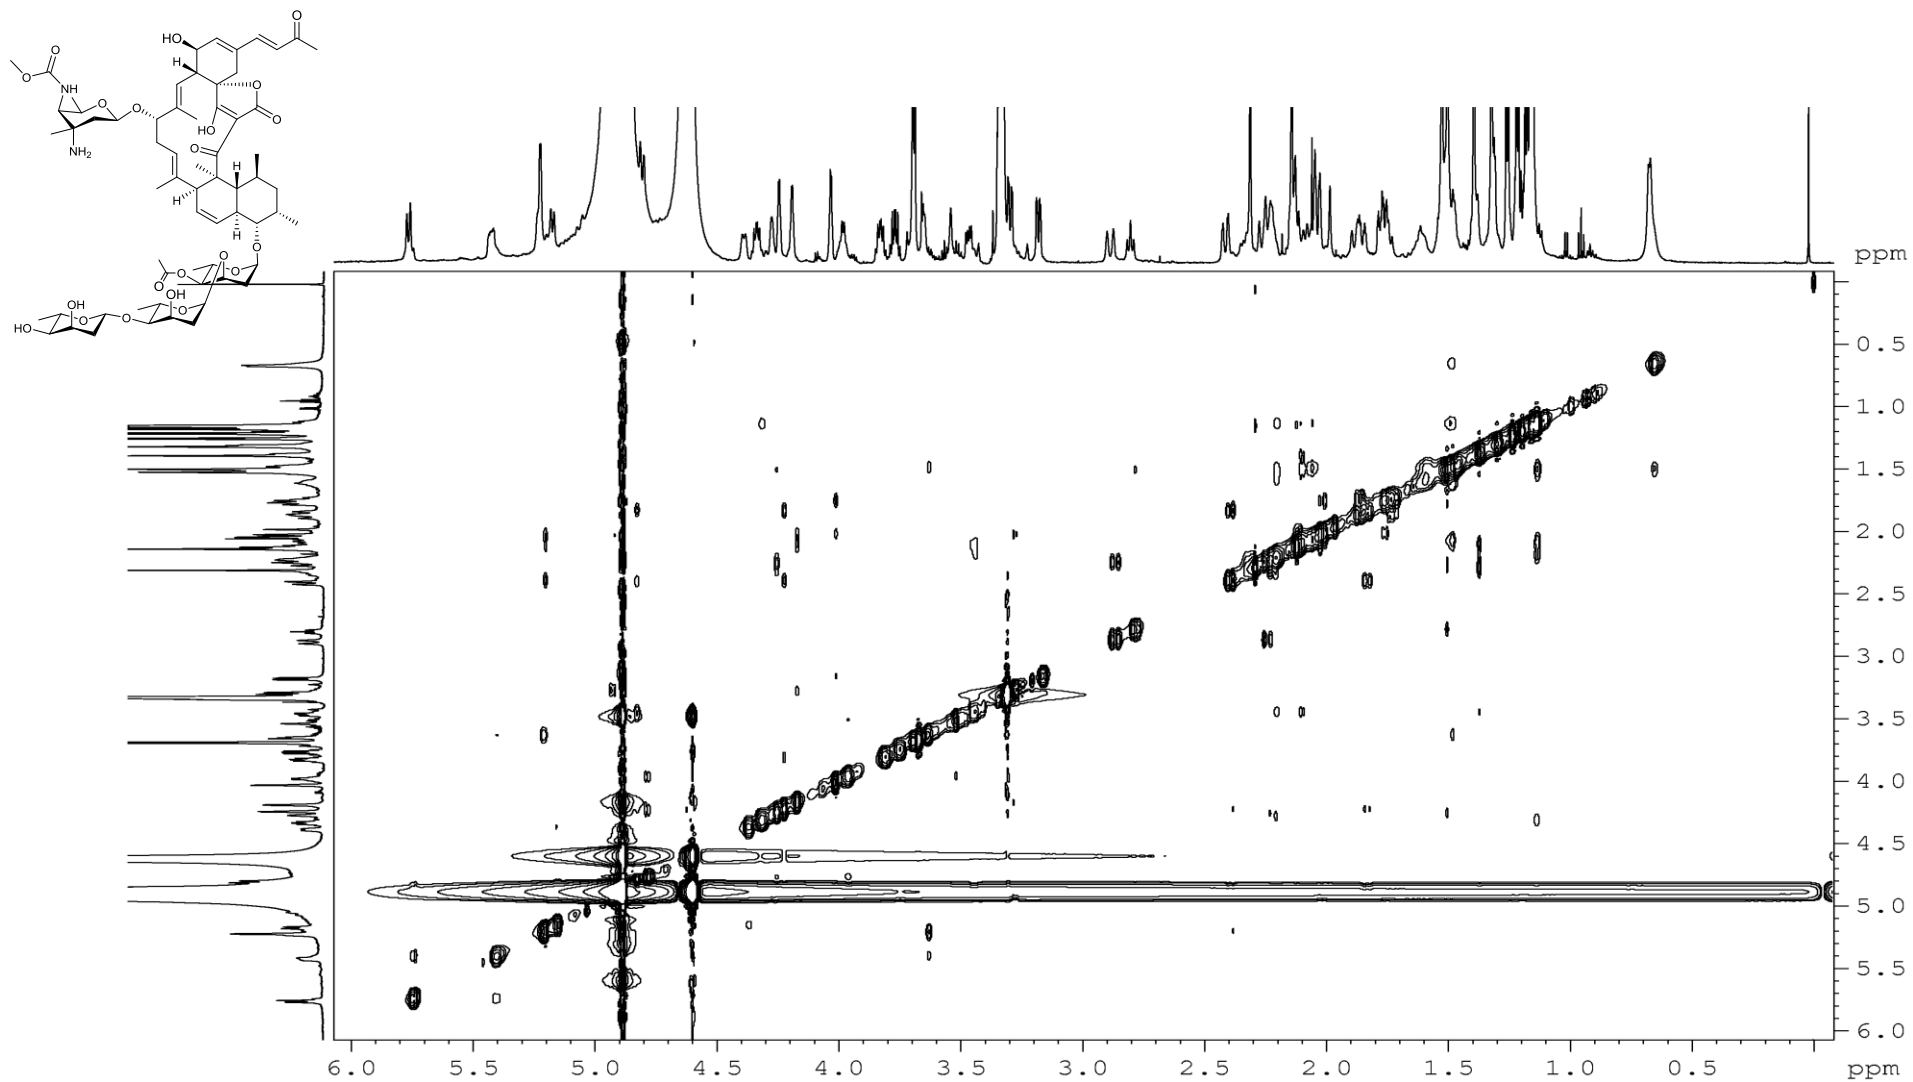

**Figure S57.**  $^1\text{H}$  NMR (700 MHz) spectrum of compound **9** in  $\text{CD}_3\text{OD}$ .

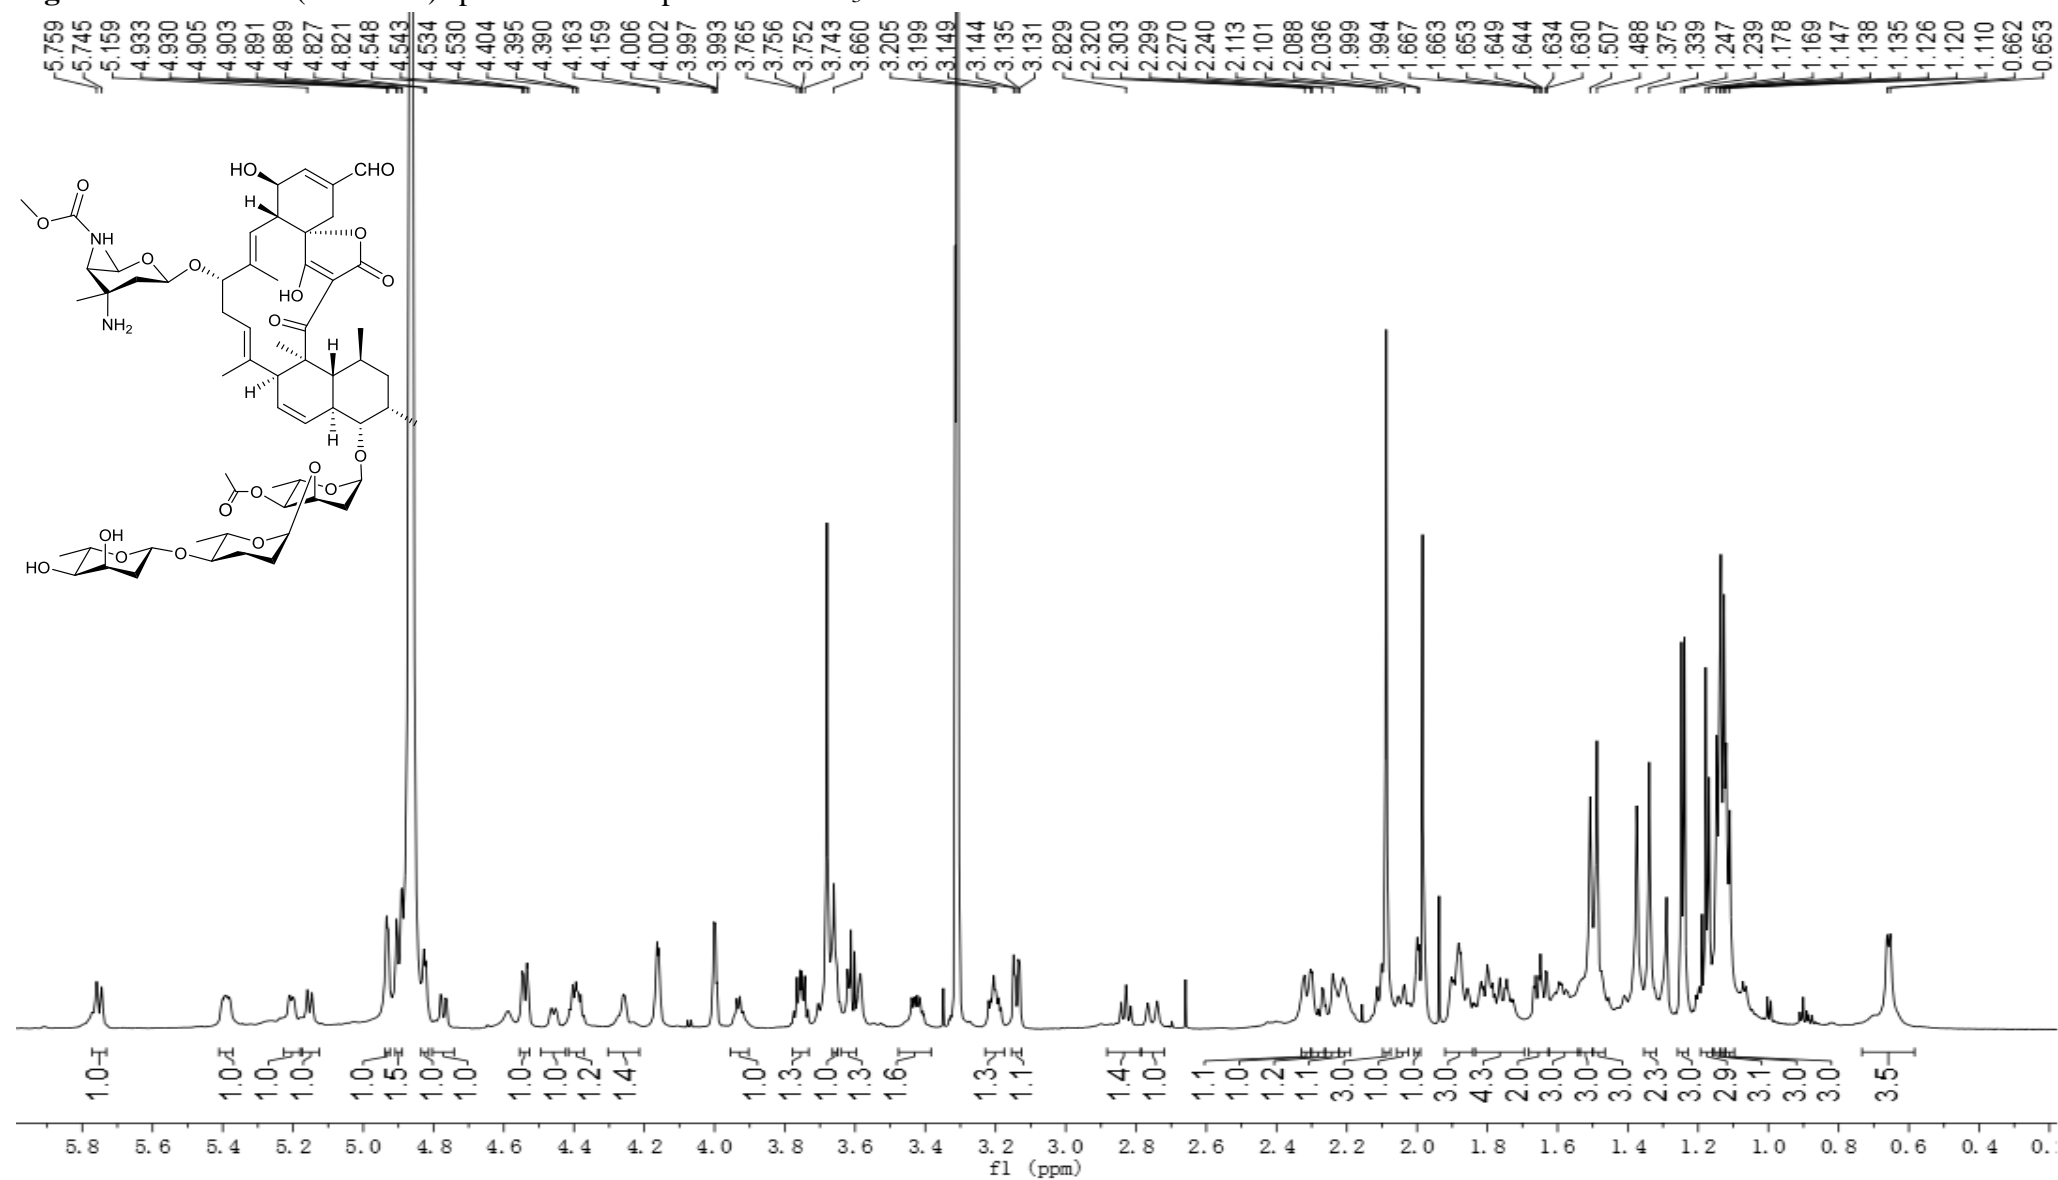

**Figure S58.**  $^{13}\text{C}$  NMR (176 MHz) spectrum of compound **9** in  $\text{CD}_3\text{OD}$ .

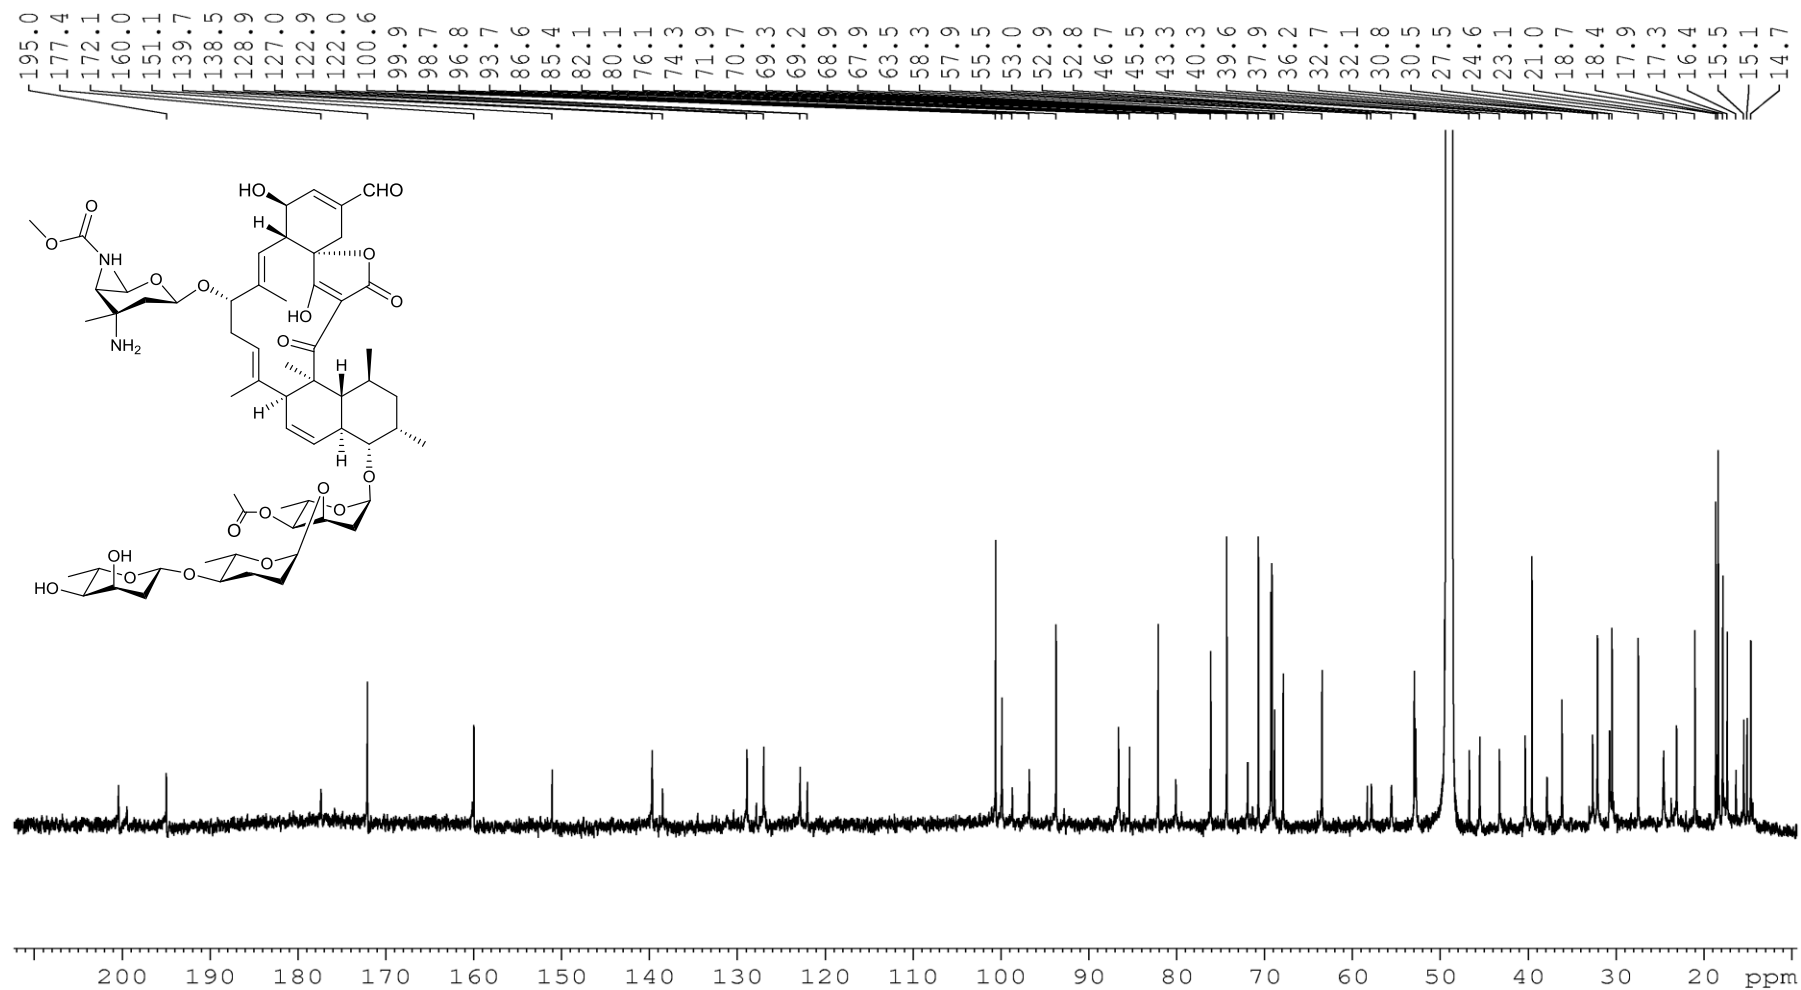

**Figure S59.**  $^{13}\text{C}$  DEPT spectrum of compound **9** in  $\text{CD}_3\text{OD}$ .

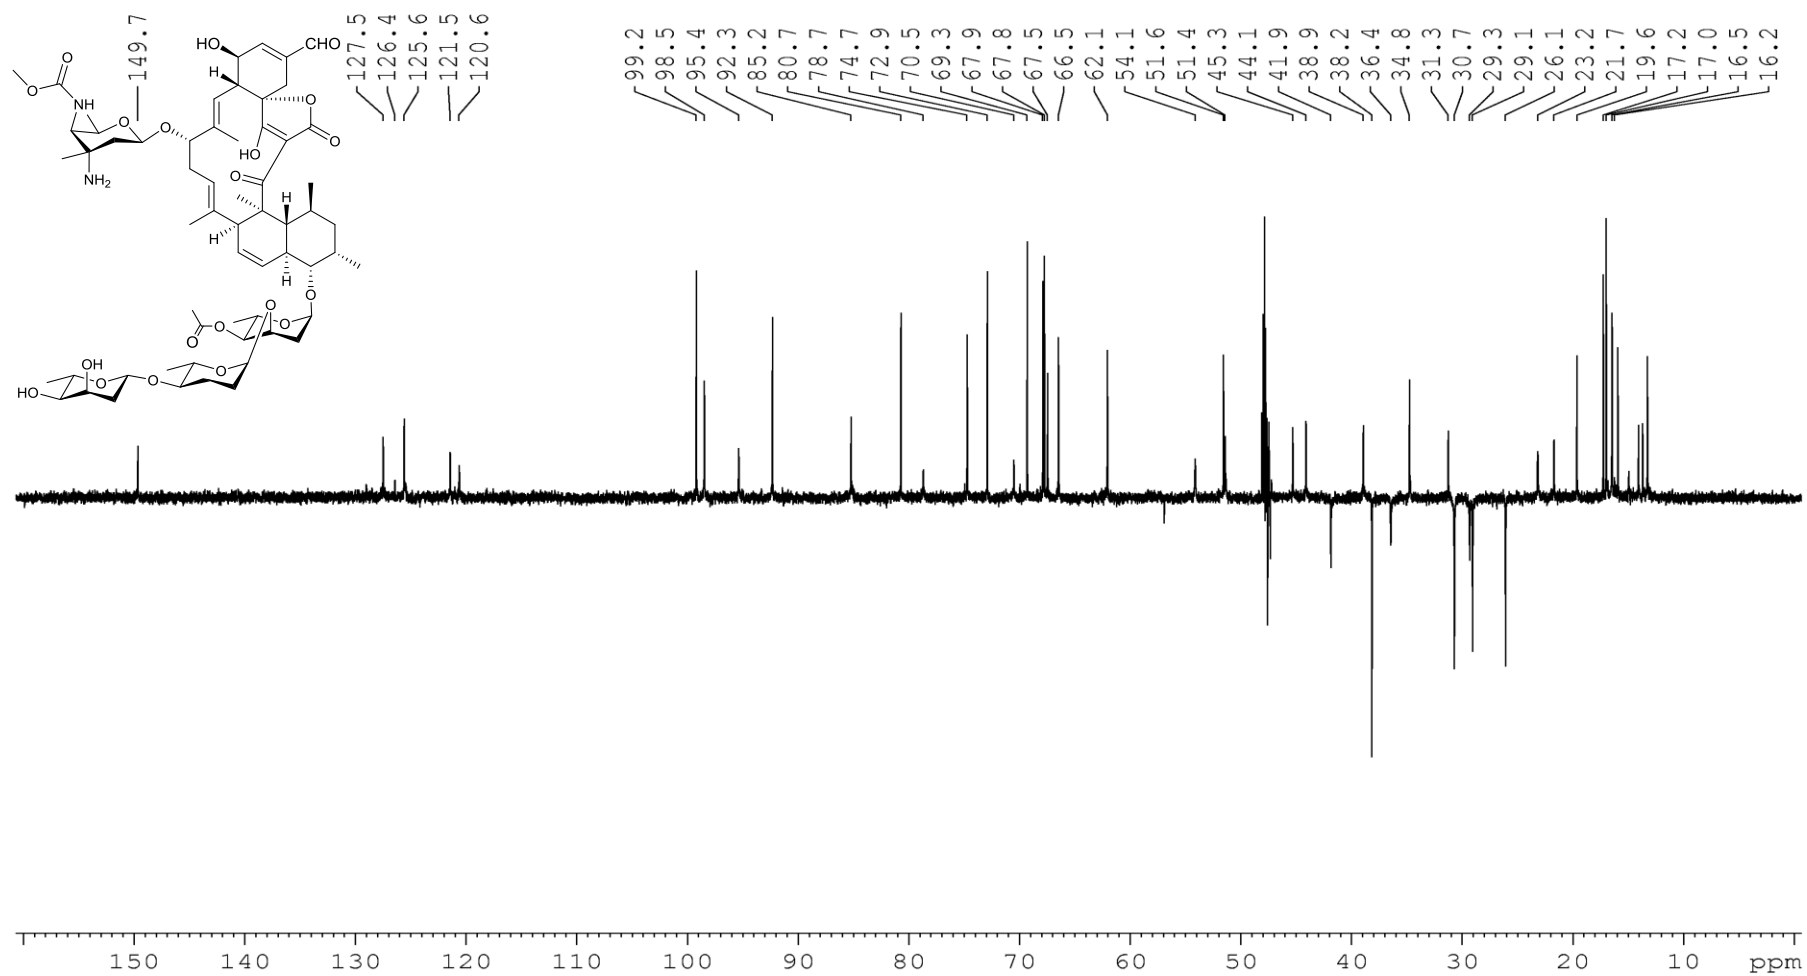

**Figure S60.**  $^1\text{H}$ - $^1\text{H}$  COSY spectrum of compound **9** in  $\text{CD}_3\text{OD}$ .

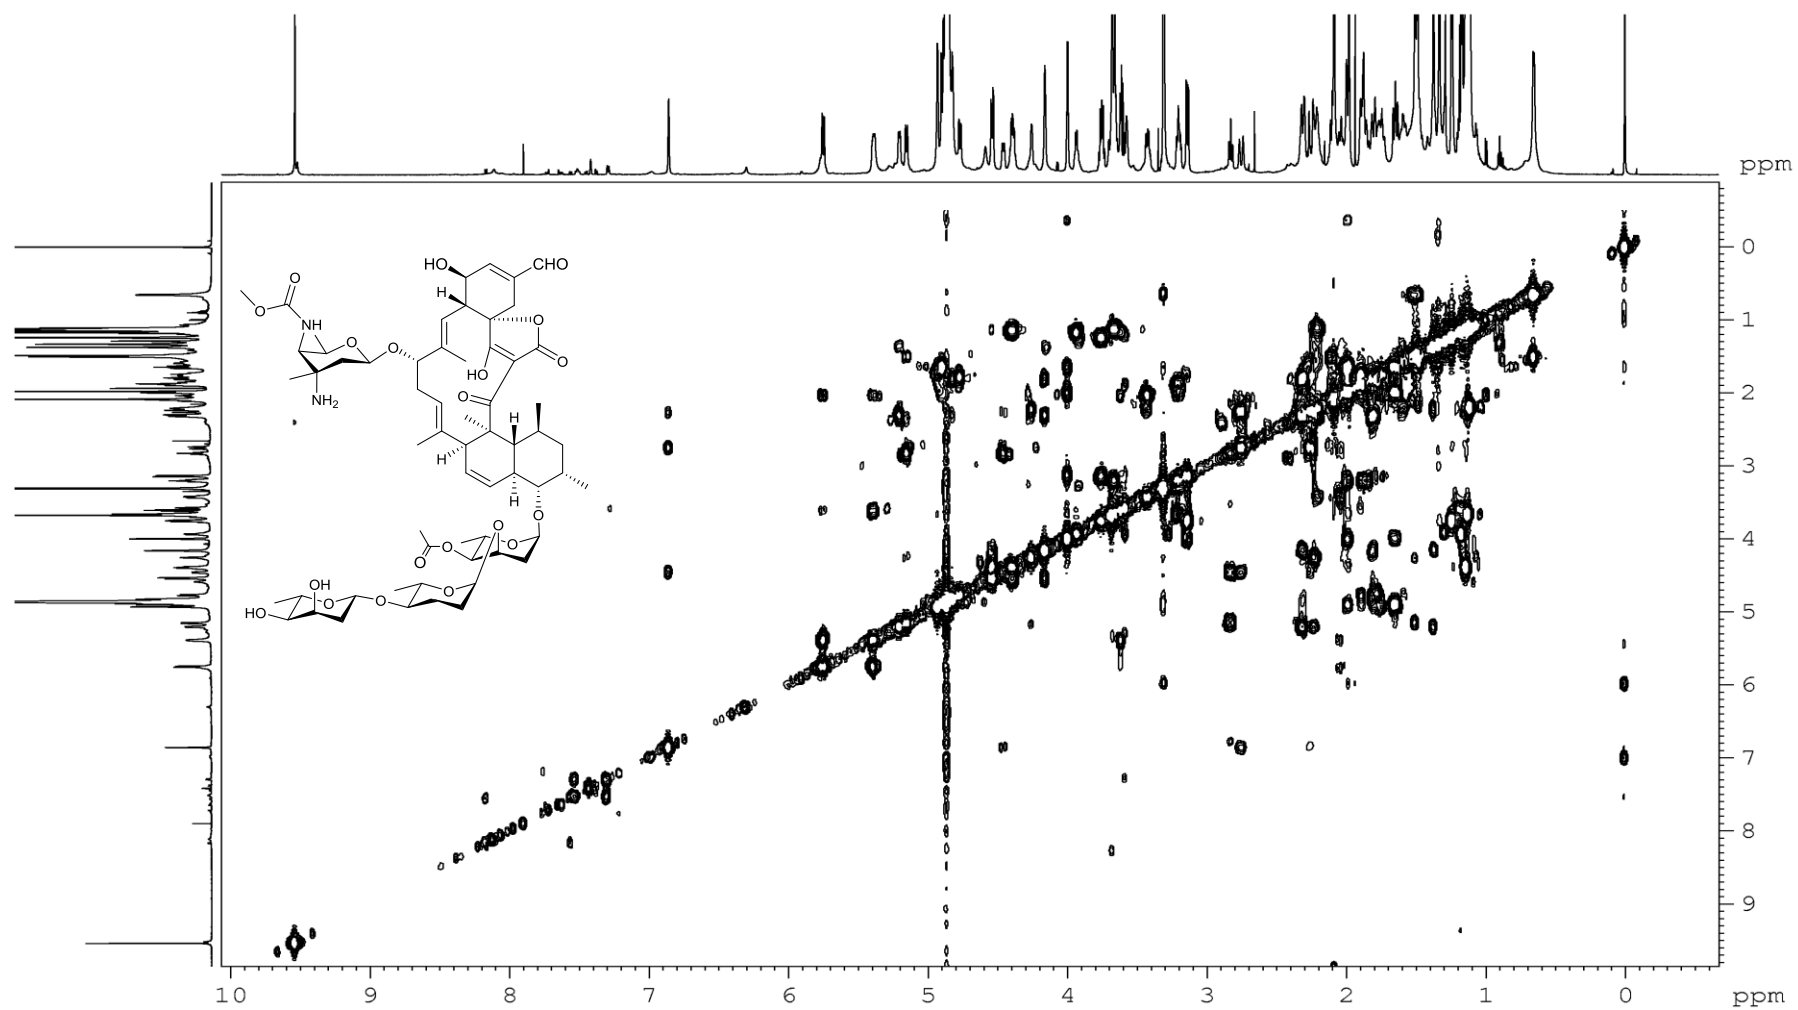

**Figure S61.** HSQC spectrum of compound **9** in CD<sub>3</sub>OD.

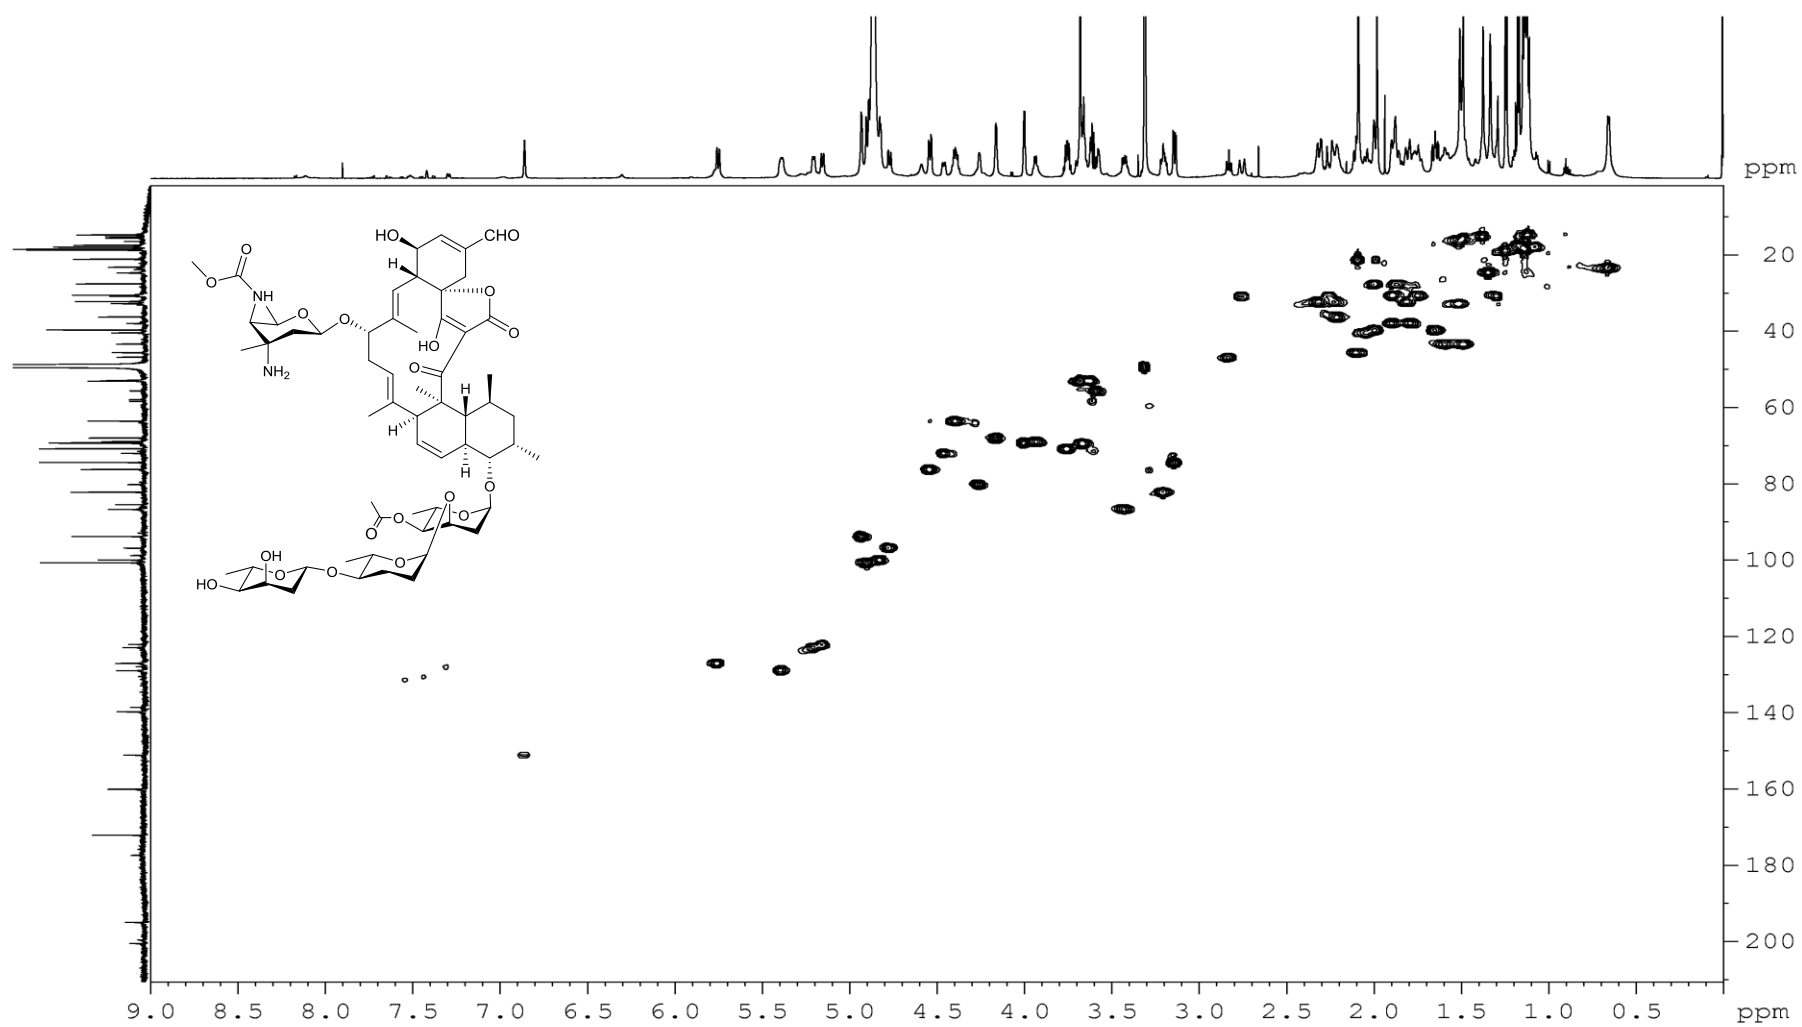

**Figure S62.** HMBC spectrum of compound **9** in CD<sub>3</sub>OD.

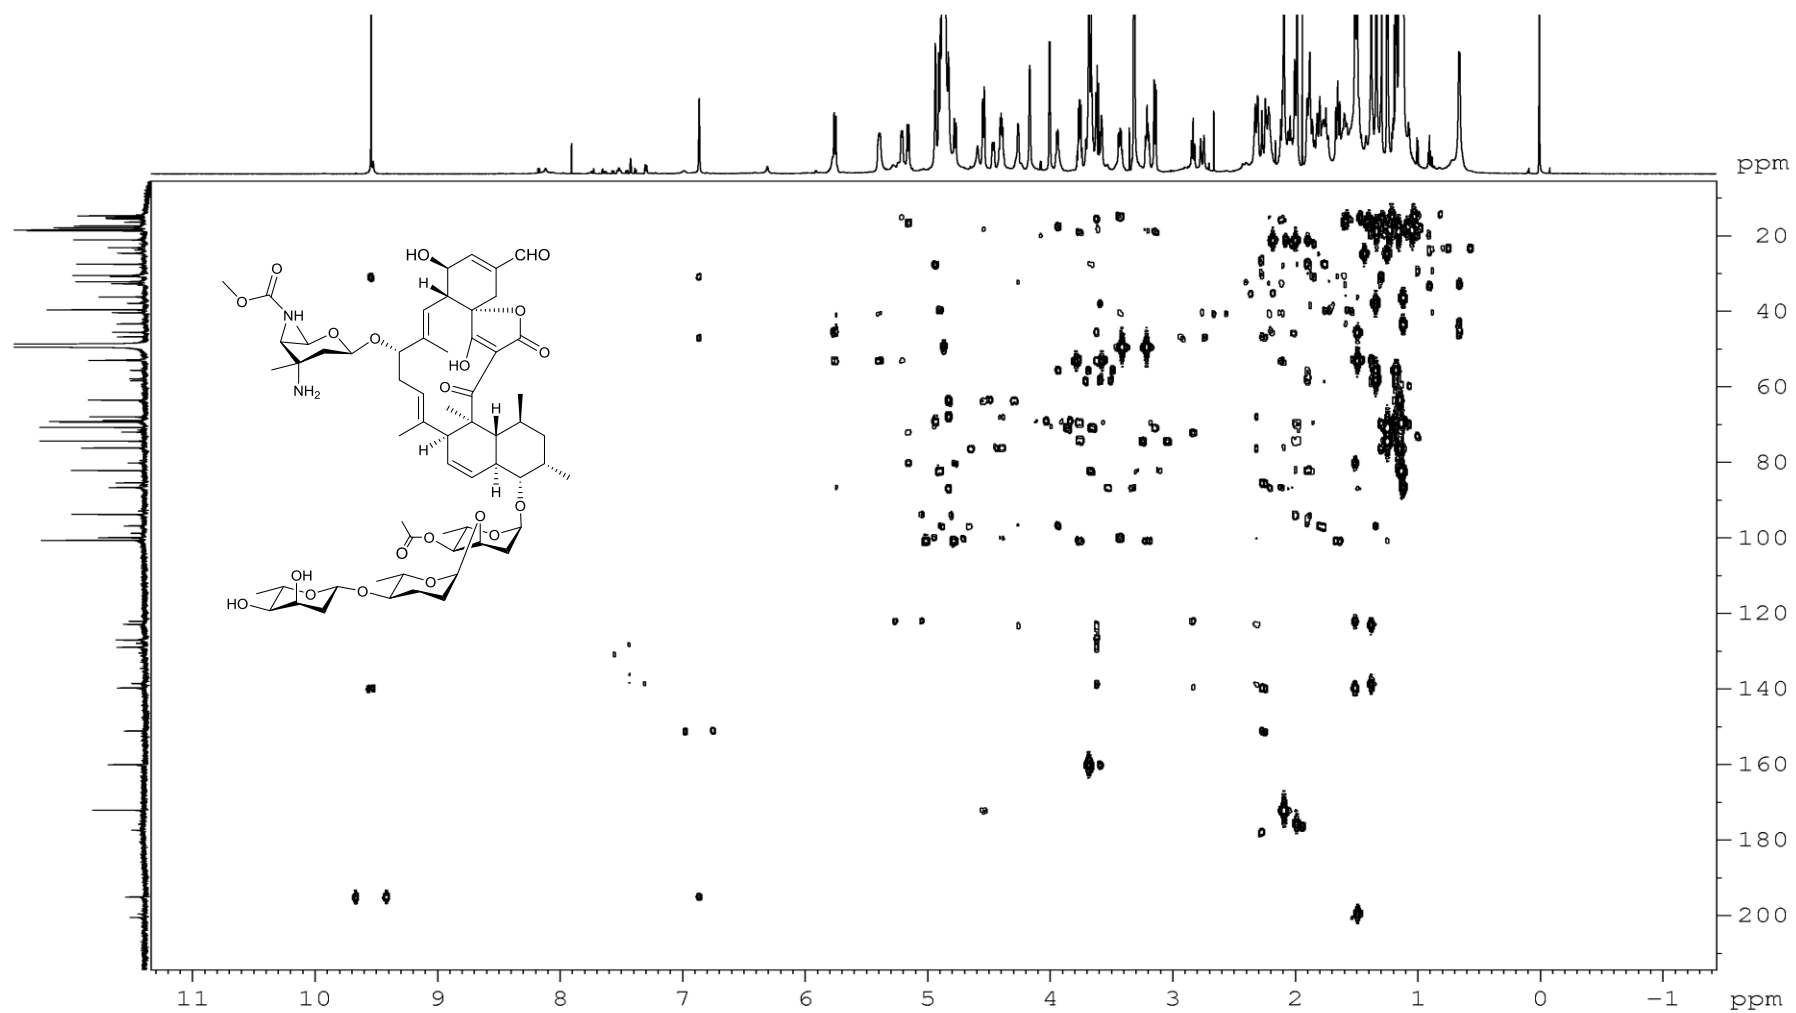

**Figure S63.** NOESY spectrum of compound **9** in CD<sub>3</sub>OD.

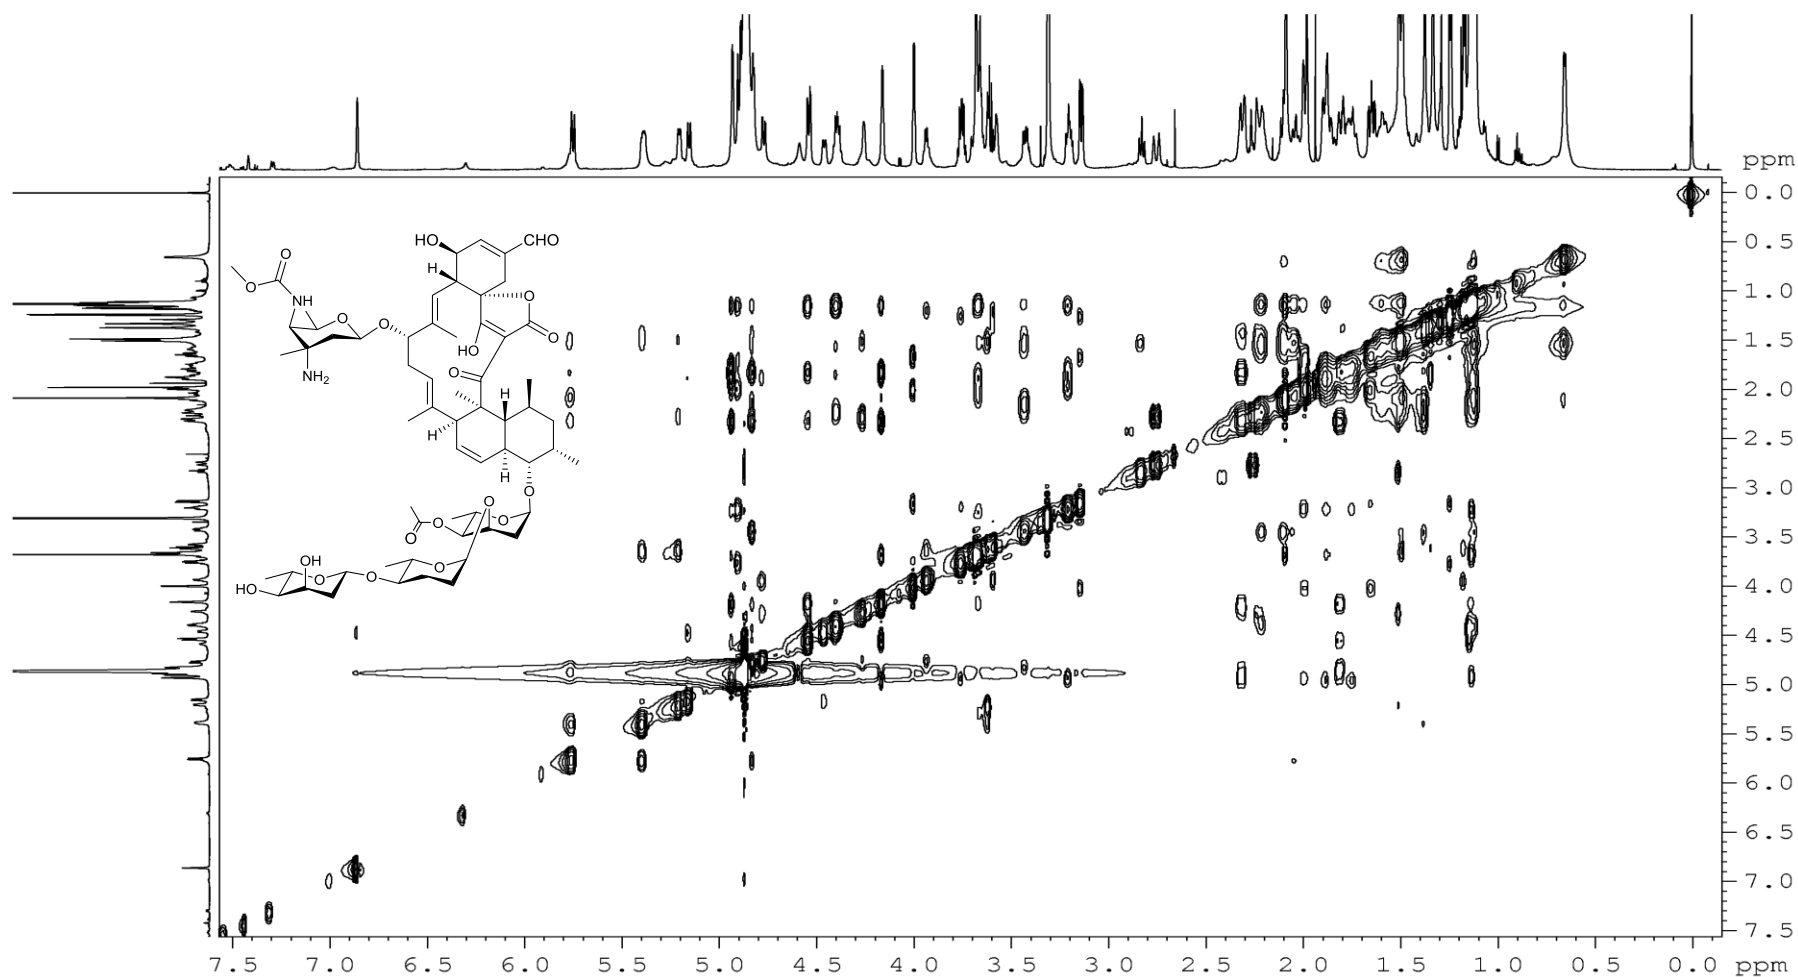



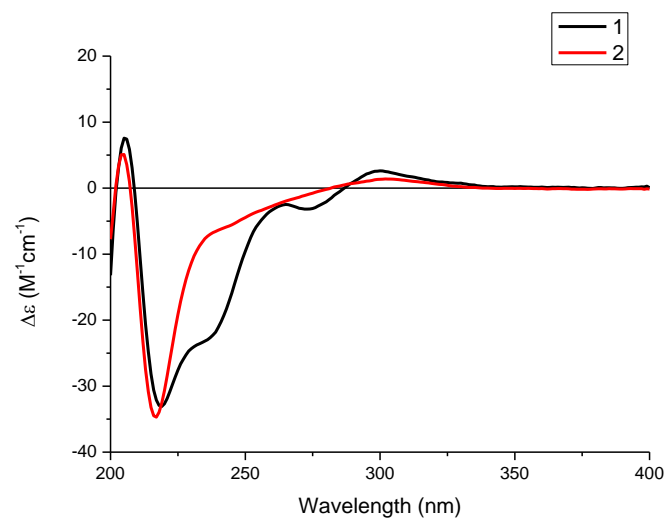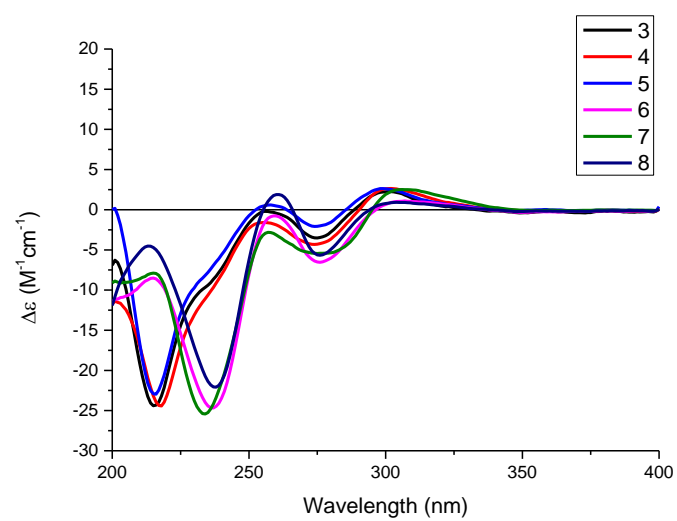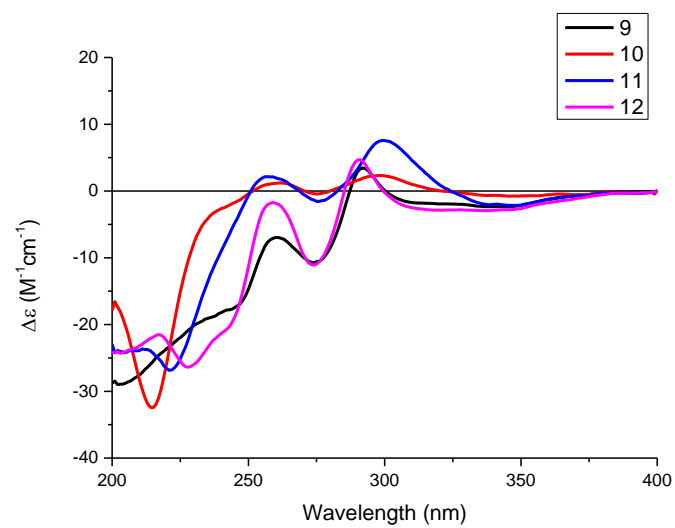

**Figure S64.** The CD spectra of compounds 1–12.
